# Supplementary material for: Genome-wide investigation of WRKY transcription factors in Tartary buckwheat (Fagopyrum tataricum) and their potential roles in regulating growth and development
Source: PeerJ. 2020 Mar 5;8:e8727. doi: 10.7717/peerj.8727 (PMC7060923; doi:10.7717/peerj.8727)
Supplement: Supplemental Information 1 [file peerj-08-8727-s007.xlsx]

## Sheet: rt-qpcr
ID	FtPinG0004237400.01	FtPinG0008708000.01	FtPinG0004132200.01	FtPinG0009798800.01	FtPinG0005008400.01	FtPinG0004460400.01	FtPinG0004319300.01	FtPinG0000497200.01	FtPinG0003001300.01	FtPinG0004829100.01	FtPinG0005111700.01	FtPinG0007313500.01	FtPinG0005089800.01	FtPinG0003761600.01	FtPinG0002524500.01	FtPinG0005486000.01	FtPinG0009522600.01	FtPinG0005089400.01	FtPinG0004464200.01	FtPinG0002334500.01	FtPinG0008419400.01	FtPinG0007226700.01	FtPinG0001770900.01	FtPinG0007768300.01	FtPinG0005105500.01	FtPinG0002374400.01
S_1	0	2.29269	0	1	5.66949	0	1	1.01532	2.57753	4.32377	1.25207	0	0	2.67676	5.72392	0	0	0	0	0	0.909862	3.94932	0	2.09452	1.6061	0
S_2	0	1	0	2.2976	5.12471	0	2.97337	1	2.73365	4.46533	1	0	0	3.53143	6.35013	1.58496	1.58496	0	0	0	0.895687	3.75291	2.72013	0	0	0
S_3	0	1.78653	0	1.79002	5.42266	0	2.30066	1.00768	2.6577	4.39628	1.13153	0	0	3.16648	6.07074	1	1	0	0	0	0.902792	3.85445	1.92397	1.39803	1.01588	0
R_1	5.00008	7.67499	7.93871	8.4997	7.28288	5.36114	5.44856	6.19964	5.36065	8.20161	3.10914	1.67	0	6.45833	6.25511	2.3749	3.94013	7.01072	1.94138	6.7268	4.47309	6.52419	6.83346	0	5.71843	1.53482
R_2	5.04938	7.22951	7.3061	8.24916	7.64702	5.50882	5.5791	5.66665	5.50941	8.26926	2.97514	1.258	0	6.45597	5.83616	1.58104	4.08192	6.83444	2.50626	6.40085	4.54113	6.76463	6.42441	0	5.56214	1.5034
R_3	4.94904	8.01489	8.37699	8.7131	6.79462	5.1966	5.30502	6.58797	5.19476	8.13062	3.23174	1.9901	0	6.46068	6.57938	2.88404	3.78286	7.16779	1	6.99251	4.40168	6.2355	7.15178	0	5.85942	1.56558
L_1	0	2.35621	4.23745	3.62974	4.75943	0	2.14192	3.84442	2.22952	5.99706	1.28425	0	2.68097	7.35446	6.97771	1.73303	3.36415	1.58496	0	1.39169	1.58496	2.41994	3.96484	0	2.37486	0
L_2	0	2.23713	3.23211	4.12708	4.75047	0	1.12212	4.10635	2.06767	4.45191	1.19115	0	2.45367	7.10291	5.88789	1.76705	1.76705	0	0	1.42184	0	1	4.15322	0	2.8588	1.68455
L_3	0	2.2979	3.82063	3.89973	4.75496	0	1.72031	3.98132	2.15086	5.42215	1.23845	0	2.57179	7.23416	6.53335	1.75014	2.77616	1	0	1.40685	1	1.87804	4.0621	0	2.63703	1.07533
FR_1	0	2.91474	1.04145	1.68913	1	0	0	5.90869	1	1	2.33551	1.04145	0	1.58496	2.38768	4.37097	4.14258	4.26663	0	1.63996	3.08656	1.81591	4.07676	0	2.82041	0
FR_2	0	3.08458	1.02087	1.81299	1.82673	1	0	5.89533	1.06231	1.1137	2.41394	1.02087	1	1	1.85463	4.98184	4.47332	4.48802	0	1.35518	3.48715	2.06893	3.23835	0	2.45002	0
FR_3	0	3.23652	1	1.92705	2.34899	1.58496	0	5.88186	1.12205	1.21909	2.48833	1	1.58496	0	1	5.40966	4.7422	4.67991	0	1	3.80035	2.28413	1	0	1.9504	0
FL_1	0	5.27842	5.09427	4.67008	5.40018	0	4.52436	4.34767	2.81262	6.09202	1.46346	3.14631	1.11339	8.18614	7.06224	3.08648	2.58403	1.65516	0	0	2.40576	5.74108	5.64006	1.58496	1	0
FL_2	1.58496	4.44106	4.74328	4.66919	6.34441	0	3.40117	4.668	2.81085	6.16134	1.6671	3.62937	1.59562	8.98964	7.02146	1.66487	0	1.52005	0	3.3363	2.61753	5.29957	6.23492	0	2.0149	1.58496
FL_3	1	4.91966	4.92942	4.66963	5.9482	0	4.06941	4.51671	2.81174	6.1271	1.56887	3.40797	1.37456	8.64312	7.042	2.54412	1.80656	1.58918	0	2.4725	2.51553	5.53715	5.96793	1	1.59491	1
DAP	FtPinG0008708000.01	FtPinG0004132200.01	FtPinG0009798800.01	FtPinG0005008400.01	FtPinG0004460400.01	FtPinG0000497200.01	FtPinG0003001300.01	FtPinG0004829100.01	FtPinG0005111700.01	FtPinG0007313500.01	FtPinG0005089800.01	FtPinG0003761600.01	FtPinG0002524500.01	FtPinG0005486000.01	FtPinG0009522600.01	FtPinG0005089400.01	FtPinG0002334500.01	FtPinG0008419400.01	FtPinG0007226700.01	FtPinG0001770900.01	FtPinG0005105500.01
13_1	3.26119	0	4.24445	3.3627	0	1.07867	2.37116	4.70693	1.11854	6.07342	1.49861	4.0693	6.87409	1	1	1	5.46743	1.49861	3.29597	7.37605	3.89736
13_2	1.95774	1	5.07314	1.84862	0	1	2.00961	4.27382	1.97805	3.92841	2.14068	5.19199	5.1401	1.03599	3.08243	3.08243	5.23691	2.96706	5.08537	4.92451	2.6305
13_3	2.77658	0	3.48197	3.60769	0	1.20695	2.12194	4.45832	1	9.40904	1	4.93085	6.07455	1.6107	2.92082	0	4.42335	1	1.65421	6.39065	3.72057
19_1	1.04354	1.70864	2.9179	3.25167	0	1.03352	1.85056	1.49407	1.54574	4.44757	2.7658	2.97917	4.40094	2.15131	0	2.06265	3.96106	3.86158	2.04074	3.96106	3.14612
19_2	1.99175	2.71913	3.07485	5.56965	1.018	2.21772	1.99047	2.63155	1.67413	1.60891	3.52021	4.27825	5.28277	2.44169	0	0	3.20177	1.94724	5.27898	3.35417	2.13196
19_3	1.46822	0	2.66548	3.17258	0	1.13749	2.02038	2.13531	1.54742	8.15593	0	3.5877	3.95362	4.49703	0	1.65905	3.24552	3.88656	4.72158	3.66286	1
25_1	1	1.10645	1	1	2.65344	2.9853	1	1.39352	2.38832	1.04147	0	1	2.38773	1.45934	2.79129	4.00678	1.64	4.67663	3.23937	4.07681	3.45672
25_2	1.6203	2.42497	1.81824	2.43866	2.00292	2.98794	1.29858	1	2.59782	1.58756	1.51733	0	1.8773	1.97567	2.72491	3.19562	4.1736	3.49113	1	2.58821	2.6323
25_3	1.19724	1.06322	1.17623	2.34894	1	2.93005	1.12202	1.6603	2.55068	1	1.92082	0	1	2.22907	3.41494	4.41612	1	5.32227	3.80374	1	2.51467

## Sheet: Pearson
FtPinG0004237400.01	Pearson correlation	1	0.93192	0.84121	0.9303	0.67168	0.96323	0.82603	0.52481	0.92807	0.74437	0.78906	0.32913	-0.47693	0.32213	0.26505	-0.06539	0.39475	0.79702	0.98513	0.97614	0.74262	0.78366	0.76045	-0.33255	0.89547	0.78918
FtPinG0004237400.01	p-value	--	0.0211	0.07412	0.02186	0.21436	0.00842	0.0848	0.36387	0.02291	0.14906	0.11254	0.58863	0.41663	0.59705	0.66652	0.9168	0.51077	0.10637	0.00217	0.00441	0.15055	0.1168	0.13557	0.58452	0.03993	0.11245
FtPinG0008708000.01	Pearson correlation	0.93192	1	0.89621	0.92151	0.58207	0.85895	0.82439	0.68783	0.81379	0.68564	0.8035	0.62979	-0.34717	0.42341	0.22149	0.13388	0.41407	0.80688	0.86662	0.94647	0.83904	0.8181	0.89507	-0.3245	0.8134	0.79628
FtPinG0008708000.01	p-value	0.0211	--	0.03951	0.02609	0.30317	0.06223	0.08597	0.19928	0.09372	0.2013	0.10143	0.25485	0.56701	0.47747	0.72032	0.83005	0.48826	0.09887	0.05729	0.01475	0.07562	0.09055	0.04015	0.5942	0.09401	0.10694
FtPinG0004132200.01	Pearson correlation	0.84121	0.89621	1	0.9768	0.68709	0.72274	0.84048	0.61262	0.79569	0.83751	0.56881	0.52897	0.02958	0.72212	0.48377	-0.07986	0.29463	0.59776	0.77406	0.89297	0.57363	0.68163	0.9736	-0.40514	0.79565	0.97758
FtPinG0004132200.01	p-value	0.07412	0.03951	--	0.00423	0.19996	0.16777	0.07463	0.27198	0.1074	0.07668	0.31697	0.35937	0.96235	0.16832	0.409	0.89843	0.63037	0.28705	0.12446	0.04135	0.31194	0.20503	0.00513	0.49864	0.10743	0.00402
FtPinG0009798800.01	Pearson correlation	0.9303	0.92151	0.9768	1	0.74632	0.83245	0.88088	0.55151	0.89613	0.86712	0.6326	0.43198	-0.15116	0.62361	0.47071	-0.14612	0.30085	0.65673	0.88416	0.94848	0.60815	0.74338	0.9175	-0.37207	0.85662	0.95668
FtPinG0009798800.01	p-value	0.02186	0.02609	0.00423	--	0.14741	0.08023	0.04846	0.33522	0.03955	0.05697	0.25208	0.4676	0.80827	0.26098	0.4236	0.81462	0.6228	0.22859	0.0465	0.01393	0.27649	0.1499	0.02809	0.53743	0.06375	0.01075
FtPinG0005008400.01	Pearson correlation	0.67168	0.58207	0.68709	0.74632	1	0.47969	0.93195	-0.12695	0.89052	0.96652	0.08272	0.29048	-0.25642	0.71977	0.874	-0.72338	-0.38092	0.09188	0.61045	0.56871	0.08093	0.8105	0.61957	0.26692	0.39049	0.73407
FtPinG0005008400.01	p-value	0.21436	0.30317	0.19996	0.14741	--	0.41354	0.02109	0.83879	0.04276	0.00732	0.8948	0.63542	0.67712	0.17039	0.05266	0.16721	0.52699	0.88318	0.27416	0.31709	0.89707	0.09616	0.265	0.66422	0.51575	0.15789
FtPinG0004460400.01	Pearson correlation	0.96323	0.85895	0.72274	0.83245	0.47969	1	0.64631	0.58583	0.82469	0.56252	0.88333	0.16254	-0.522	0.08951	0.03056	0.087	0.57887	0.89124	0.98708	0.95432	0.79679	0.62395	0.61939	-0.4786	0.94173	0.66571
FtPinG0004460400.01	p-value	0.00842	0.06223	0.16777	0.08023	0.41354	--	0.23865	0.29929	0.08576	0.32358	0.04699	0.79396	0.36693	0.88618	0.9611	0.88937	0.30649	0.04235	0.00176	0.01164	0.10655	0.26064	0.26519	0.41476	0.01674	0.22001
FtPinG0004319300.01	Pearson correlation	0.82603	0.82439	0.84048	0.88088	0.93195	0.64631	1	0.19428	0.93255	0.94461	0.36927	0.54691	-0.32305	0.69674	0.70721	-0.42689	-0.13573	0.3728	0.74052	0.7583	0.40997	0.93441	0.81624	0.11148	0.55352	0.8182
FtPinG0004319300.01	p-value	0.0848	0.08597	0.07463	0.04846	0.02109	0.23865	--	0.75419	0.02081	0.01552	0.54075	0.34012	0.59595	0.19109	0.1816	0.47345	0.82772	0.53657	0.15234	0.13736	0.49302	0.01996	0.09191	0.85835	0.3331	0.09047
FtPinG0000497200.01	Pearson correlation	0.52481	0.68783	0.61262	0.55151	-0.12695	0.58583	0.19428	1	0.20293	0.08657	0.82335	0.45966	0.08964	0.08789	-0.36632	0.72887	0.8582	0.84044	0.50031	0.67824	0.84143	0.179	0.65229	-0.78828	0.71192	0.496
FtPinG0000497200.01	p-value	0.36387	0.19928	0.27198	0.33522	0.83879	0.29929	0.75419	--	0.74341	0.88991	0.08673	0.43606	0.88602	0.88824	0.54424	0.1624	0.06272	0.07465	0.39066	0.2082	0.07397	0.77332	0.23287	0.11316	0.17737	0.39542
FtPinG0003001300.01	Pearson correlation	0.92807	0.81379	0.79569	0.89613	0.89052	0.82469	0.93255	0.20293	1	0.90251	0.50991	0.27118	-0.46975	0.48622	0.56941	-0.42322	0.0411	0.51733	0.90118	0.84989	0.46659	0.85571	0.70002	-0.04783	0.72362	0.79275
FtPinG0003001300.01	p-value	0.02291	0.09372	0.1074	0.03955	0.04276	0.08576	0.02081	0.74341	--	0.036	0.38011	0.659	0.42468	0.40627	0.31636	0.47769	0.94768	0.37201	0.03673	0.06822	0.42824	0.06435	0.1881	0.93912	0.167	0.10967
FtPinG0004829100.01	Pearson correlation	0.74437	0.68564	0.83751	0.86712	0.96652	0.56252	0.94461	0.08657	0.90251	1	0.20044	0.3381	-0.10658	0.80319	0.83715	-0.59823	-0.19695	0.22211	0.68224	0.69309	0.18799	0.7719	0.76934	0.03683	0.5457	0.88274
FtPinG0004829100.01	p-value	0.14906	0.2013	0.07668	0.05697	0.00732	0.32358	0.01552	0.88991	0.036	--	0.74651	0.57786	0.86456	0.10166	0.07693	0.28656	0.75087	0.71954	0.20446	0.19444	0.76206	0.1262	0.12828	0.95312	0.34141	0.04735
FtPinG0005111700.01	Pearson correlation	0.78906	0.8035	0.56881	0.6326	0.08272	0.88333	0.36927	0.82335	0.50991	0.20044	1	0.29985	-0.45895	-0.14715	-0.3641	0.53904	0.8169	0.99781	0.80332	0.83754	0.96702	0.44062	0.53885	-0.61011	0.84671	0.44151
FtPinG0005111700.01	p-value	0.11254	0.10143	0.31697	0.25208	0.8948	0.04699	0.54075	0.08673	0.38011	0.74651	--	0.62402	0.43686	0.81332	0.54687	0.34854	0.09142	0.000123021	0.10156	0.07666	0.00716	0.45771	0.34874	0.27451	0.07037	0.45669
FtPinG0007313500.01	Pearson correlation	0.32913	0.62979	0.52897	0.43198	0.29048	0.16254	0.54691	0.45966	0.27118	0.3381	0.29985	1	-0.05006	0.49495	0.21282	0.25712	-0.02308	0.28054	0.1702	0.3546	0.51724	0.65266	0.7012	0.14834	0.10604	0.38337
FtPinG0007313500.01	p-value	0.58863	0.25485	0.35937	0.4676	0.63542	0.79396	0.34012	0.43606	0.659	0.57786	0.62402	--	0.93629	0.39658	0.73108	0.67626	0.97061	0.64755	0.78435	0.55815	0.37211	0.2325	0.18703	0.81182	0.86524	0.52412
FtPinG0005089800.01	Pearson correlation	-0.47693	-0.34717	0.02958	-0.15116	-0.25642	-0.522	-0.32305	0.08964	-0.46975	-0.10658	-0.45895	-0.05006	1	0.42852	0.14431	0.04804	-0.02914	-0.41183	-0.49945	-0.31743	-0.4542	-0.56526	0.0711	-0.31703	-0.21321	0.12637
FtPinG0005089800.01	p-value	0.41663	0.56701	0.96235	0.80827	0.67712	0.36693	0.59595	0.88602	0.42468	0.86456	0.43686	0.93629	--	0.47158	0.81689	0.93886	0.9629	0.49086	0.39161	0.60273	0.44224	0.3207	0.90955	0.60321	0.73061	0.83953
FtPinG0003761600.01	Pearson correlation	0.32213	0.42341	0.72212	0.62361	0.71977	0.08951	0.69674	0.08789	0.48622	0.80319	-0.14715	0.49495	0.42852	1	0.85738	-0.4743	-0.33512	-0.11512	0.21138	0.35005	-0.0808	0.47419	0.74624	0.05639	0.20101	0.77973
FtPinG0003761600.01	p-value	0.59705	0.47747	0.16832	0.26098	0.17039	0.88618	0.19109	0.88824	0.40627	0.10166	0.81332	0.39658	0.47158	--	0.06326	0.41957	0.58144	0.85375	0.73289	0.56358	0.89723	0.4197	0.14747	0.92824	0.74579	0.11991
FtPinG0002524500.01	Pearson correlation	0.26505	0.22149	0.48377	0.47071	0.874	0.03056	0.70721	-0.36632	0.56941	0.83715	-0.3641	0.21282	0.14431	0.85738	1	-0.84984	-0.65806	-0.34507	0.18809	0.18806	-0.3408	0.51816	0.44966	0.40549	0.02602	0.58714
FtPinG0002524500.01	p-value	0.66652	0.72032	0.409	0.4236	0.05266	0.9611	0.1816	0.54424	0.31636	0.07693	0.54687	0.73108	0.81689	0.06326	--	0.06826	0.22732	0.56952	0.76193	0.76197	0.57463	0.37111	0.4474	0.49823	0.96688	0.29794
FtPinG0005486000.01	Pearson correlation	-0.06539	0.13388	-0.07986	-0.14612	-0.72338	0.087	-0.42689	0.72887	-0.42322	-0.59823	0.53904	0.25712	0.04804	-0.4743	-0.84984	1	0.7623	0.52841	-0.06243	0.07333	0.59681	-0.27421	0.02333	-0.54497	0.15451	-0.2295
FtPinG0005486000.01	p-value	0.9168	0.83005	0.89843	0.81462	0.16721	0.88937	0.47345	0.1624	0.47769	0.28656	0.34854	0.67626	0.93886	0.41957	0.06826	--	0.13405	0.35998	0.92056	0.90672	0.28801	0.6553	0.97029	0.34219	0.80405	0.71037
FtPinG0009522600.01	Pearson correlation	0.39475	0.41407	0.29463	0.30085	-0.38092	0.57887	-0.13573	0.8582	0.0411	-0.19695	0.8169	-0.02308	-0.02914	-0.33512	-0.65806	0.7623	1	0.83439	0.45883	0.53336	0.73053	-0.1392	0.25643	-0.90251	0.69739	0.21393
FtPinG0009522600.01	p-value	0.51077	0.48826	0.63037	0.6228	0.52699	0.30649	0.82772	0.06272	0.94768	0.75087	0.09142	0.97061	0.9629	0.58144	0.22732	0.13405	--	0.07886	0.437	0.35463	0.16096	0.82334	0.67712	0.036	0.1905	0.72971
FtPinG0005089400.01	Pearson correlation	0.79702	0.80688	0.59776	0.65673	0.09188	0.89124	0.3728	0.84044	0.51733	0.22211	0.99781	0.28054	-0.41183	-0.11512	-0.34507	0.52841	0.83439	1	0.81405	0.85435	0.95558	0.42112	0.56071	-0.65329	0.8745	0.47961
FtPinG0005089400.01	p-value	0.10637	0.09887	0.28705	0.22859	0.88318	0.04235	0.53657	0.07465	0.37201	0.71954	0.000123021	0.64755	0.49086	0.85375	0.56952	0.35998	0.07886	--	0.09352	0.06525	0.01116	0.48011	0.32549	0.2319	0.05235	0.41363
FtPinG0004464200.01	Pearson correlation	0.98513	0.86662	0.77406	0.88416	0.61045	0.98708	0.74052	0.50031	0.90118	0.68224	0.80332	0.1702	-0.49945	0.21138	0.18809	-0.06243	0.45883	0.81405	1	0.96088	0.717	0.68801	0.6624	-0.40087	0.92651	0.73763
FtPinG0004464200.01	p-value	0.00217	0.05729	0.12446	0.0465	0.27416	0.00176	0.15234	0.39066	0.03673	0.20446	0.10156	0.78435	0.39161	0.73289	0.76193	0.92056	0.437	0.09352	--	0.00923	0.17285	0.19911	0.22316	0.50362	0.02365	0.15482
FtPinG0002334500.01	Pearson correlation	0.97614	0.94647	0.89297	0.94848	0.56871	0.95432	0.7583	0.67824	0.84989	0.69309	0.83754	0.3546	-0.31743	0.35005	0.18806	0.07333	0.53336	0.85435	0.96088	1	0.7896	0.68413	0.82267	-0.50521	0.95155	0.83809
FtPinG0002334500.01	p-value	0.00441	0.01475	0.04135	0.01393	0.31709	0.01164	0.13736	0.2082	0.06822	0.19444	0.07666	0.55815	0.60273	0.56358	0.76197	0.90672	0.35463	0.06525	0.00923	--	0.11213	0.2027	0.08722	0.38526	0.01271	0.07628
FtPinG0008419400.01	Pearson correlation	0.74262	0.83904	0.57363	0.60815	0.08093	0.79679	0.40997	0.84143	0.46659	0.18799	0.96702	0.51724	-0.4542	-0.0808	-0.3408	0.59681	0.73053	0.95558	0.717	0.7896	1	0.52881	0.5998	-0.48345	0.736	0.41232
FtPinG0008419400.01	p-value	0.15055	0.07562	0.31194	0.27649	0.89707	0.10655	0.49302	0.07397	0.42824	0.76206	0.00716	0.37211	0.44224	0.89723	0.57463	0.28801	0.16096	0.01116	0.17285	0.11213	--	0.35955	0.28496	0.40935	0.15623	0.49029
FtPinG0007226700.01	Pearson correlation	0.78366	0.8181	0.68163	0.74338	0.8105	0.62395	0.93441	0.179	0.85571	0.7719	0.44062	0.65266	-0.56526	0.47419	0.51816	-0.27421	-0.1392	0.42112	0.68801	0.68413	0.52881	1	0.69923	0.26754	0.43658	0.59946
FtPinG0007226700.01	p-value	0.1168	0.09055	0.20503	0.1499	0.09616	0.26064	0.01996	0.77332	0.06435	0.1262	0.45771	0.2325	0.3207	0.4197	0.37111	0.6553	0.82334	0.48011	0.19911	0.2027	0.35955	--	0.18882	0.66346	0.46232	0.2853
FtPinG0001770900.01	Pearson correlation	0.76045	0.89507	0.9736	0.9175	0.61957	0.61939	0.81624	0.65229	0.70002	0.76934	0.53885	0.7012	0.0711	0.74624	0.44966	0.02333	0.25643	0.56071	0.6624	0.82267	0.5998	0.69923	1	-0.33252	0.68556	0.92003
FtPinG0001770900.01	p-value	0.13557	0.04015	0.00513	0.02809	0.265	0.26519	0.09191	0.23287	0.1881	0.12828	0.34874	0.18703	0.90955	0.14747	0.4474	0.97029	0.67712	0.32549	0.22316	0.08722	0.28496	0.18882	--	0.58456	0.20138	0.02682
FtPinG0007768300.01	Pearson correlation	-0.33255	-0.3245	-0.40514	-0.37207	0.26692	-0.4786	0.11148	-0.78828	-0.04783	0.03683	-0.61011	0.14834	-0.31703	0.05639	0.40549	-0.54497	-0.90251	-0.65329	-0.40087	-0.50521	-0.48345	0.26754	-0.33252	1	-0.71092	-0.40281
FtPinG0007768300.01	p-value	0.58452	0.5942	0.49864	0.53743	0.66422	0.41476	0.85835	0.11316	0.93912	0.95312	0.27451	0.81182	0.60321	0.92824	0.49823	0.34219	0.036	0.2319	0.50362	0.38526	0.40935	0.66346	0.58456	--	0.17826	0.50136
FtPinG0005105500.01	Pearson correlation	0.89547	0.8134	0.79565	0.85662	0.39049	0.94173	0.55352	0.71192	0.72362	0.5457	0.84671	0.10604	-0.21321	0.20101	0.02602	0.15451	0.69739	0.8745	0.92651	0.95155	0.736	0.43658	0.68556	-0.71092	1	0.76958
FtPinG0005105500.01	p-value	0.03993	0.09401	0.10743	0.06375	0.51575	0.01674	0.3331	0.17737	0.167	0.34141	0.07037	0.86524	0.73061	0.74579	0.96688	0.80405	0.1905	0.05235	0.02365	0.01271	0.15623	0.46232	0.20138	0.17826	--	0.12808
FtPinG0002374400.01	Pearson correlation	0.78918	0.79628	0.97758	0.95668	0.73407	0.66571	0.8182	0.496	0.79275	0.88274	0.44151	0.38337	0.12637	0.77973	0.58714	-0.2295	0.21393	0.47961	0.73763	0.83809	0.41232	0.59946	0.92003	-0.40281	0.76958	1
FtPinG0002374400.01	p-value	0.11245	0.10694	0.00402	0.01075	0.15789	0.22001	0.09047	0.39542	0.10967	0.04735	0.45669	0.52412	0.83953	0.11991	0.29794	0.71037	0.72971	0.41363	0.15482	0.07628	0.49029	0.2853	0.02682	0.50136	0.12808	--
DAP	Pearson correlation	1	-0.93236	0.88585	-0.99941	-0.4884	0.938	0.94368	-0.94761	-0.95629	0.9432	-0.98114	-0.42006	-0.96186	-0.98477	0.36655	0.2051	0.84509	-0.99696	0.99951	-0.49834	-0.97447	-0.41224
DAP	p-value	--	0.23549	0.30715	0.0218	0.67516	0.22534	0.21468	0.20698	0.18893	0.2156	0.12383	0.72402	0.17639	0.11123	0.76108	0.86849	0.35909	0.04962	0.01992	0.66789	0.14416	0.72949
FtPinG0008708000.01	Pearson correlation	-0.93236	1	-0.99367	0.91943	0.13988	-0.74924	-0.76023	0.76803	0.99733	-0.75929	0.8449	0.06356	0.7979	0.85531	-0.67812	0.16262	-0.59464	0.95768	-0.94321	0.15118	0.98973	0.71374
FtPinG0008708000.01	p-value	0.23549	--	0.07165	0.25729	0.91066	0.46084	0.45017	0.44248	0.04656	0.45109	0.35932	0.95951	0.41188	0.34673	0.52559	0.89601	0.59459	0.18588	0.21557	0.90338	0.09134	0.494
FtPinG0004132200.01	Pearson correlation	0.88585	-0.99367	1	-0.86945	-0.02778	0.67011	0.68245	-0.69124	-0.98281	0.6814	-0.77947	0.04894	-0.72515	-0.79171	0.75638	-0.27241	0.50058	-0.91929	0.89994	-0.0392	-0.96741	-0.78789
FtPinG0004132200.01	p-value	0.30715	0.07165	--	0.32895	0.98231	0.53249	0.52182	0.51413	0.11822	0.52275	0.43097	0.96883	0.48354	0.41838	0.45393	0.82436	0.66624	0.25753	0.28723	0.97504	0.16299	0.42235
FtPinG0009798800.01	Pearson correlation	-0.99941	0.91943	-0.86945	1	0.51799	-0.94932	-0.95445	0.95799	0.94571	-0.95402	0.98719	0.45088	0.97066	0.99015	-0.33448	-0.23849	-0.8629	0.99371	-0.99785	0.52773	0.96621	0.3808
FtPinG0009798800.01	p-value	0.0218	0.25729	0.32895	--	0.65336	0.20354	0.19288	0.18518	0.21073	0.1938	0.10203	0.70222	0.15459	0.08943	0.78288	0.84669	0.33729	0.07142	0.04172	0.64609	0.16596	0.75129
FtPinG0005008400.01	Pearson correlation	-0.4884	0.13988	-0.02778	0.51799	1	-0.76059	-0.74961	0.74155	0.21186	-0.75057	0.64785	0.99706	0.70847	0.63266	0.63287	-0.95424	-0.87926	0.41898	-0.46086	0.99993	0.28001	-0.59369
FtPinG0005008400.01	p-value	0.67516	0.91066	0.98231	0.65336	--	0.44982	0.46048	0.46818	0.86409	0.45956	0.55134	0.04886	0.49877	0.56393	0.56376	0.19333	0.31607	0.72478	0.69508	0.00727	0.81932	0.59534
FtPinG0004460400.01	Pearson correlation	0.938	-0.74924	0.67011	-0.94932	-0.76059	1	0.99986	-0.99958	-0.79564	0.99988	-0.98731	-0.70858	-0.99704	-0.98398	0.02132	0.53164	0.97801	-0.90817	0.9267	-0.76796	-0.83624	-0.07088
FtPinG0004460400.01	p-value	0.22534	0.46084	0.53249	0.20354	0.44982	--	0.01067	0.01836	0.41427	0.00974	0.10152	0.49867	0.04895	0.11411	0.98642	0.64315	0.13375	0.27496	0.24527	0.44255	0.3695	0.95484
FtPinG0000497200.01	Pearson correlation	0.94368	-0.76023	0.68245	-0.95445	-0.74961	0.99986	1	-0.99993	-0.80567	1	-0.98983	-0.69666	-0.99819	-0.98683	0.03807	0.51738	0.97438	-0.91506	0.93287	-0.75712	-0.84531	-0.08758
FtPinG0000497200.01	p-value	0.21468	0.45017	0.52182	0.19288	0.46048	0.01067	--	0.0077	0.40361	0.000922315	0.09085	0.50934	0.03829	0.10344	0.97576	0.65382	0.14442	0.26429	0.2346	0.45321	0.35884	0.94417
FtPinG0003001300.01	Pearson correlation	-0.94761	0.76803	-0.69124	0.95799	0.74155	-0.99958	-0.99993	1	0.81278	-0.99991	0.99148	0.68793	0.99885	0.98871	-0.05015	-0.50699	-0.97159	0.91986	-0.93715	0.74917	0.8517	0.09962
FtPinG0003001300.01	p-value	0.20698	0.44248	0.51413	0.18518	0.46818	0.01836	0.0077	--	0.39591	0.00862	0.08315	0.51704	0.03059	0.09575	0.96806	0.66151	0.15211	0.2566	0.2269	0.46091	0.35114	0.93648
FtPinG0004829100.01	Pearson correlation	-0.95629	0.99733	-0.98281	0.94571	0.21186	-0.79564	-0.80567	0.81278	1	-0.80481	0.88173	0.13631	0.83982	0.89089	-0.6226	0.09008	-0.65181	0.97615	-0.96497	0.22302	0.99753	0.66065
FtPinG0004829100.01	p-value	0.18893	0.04656	0.11822	0.21073	0.86409	0.41427	0.40361	0.39591	--	0.40453	0.31276	0.91295	0.36532	0.30016	0.57215	0.94258	0.54802	0.13931	0.16901	0.85682	0.04477	0.54056
FtPinG0005111700.01	Pearson correlation	0.9432	-0.75929	0.6814	-0.95402	-0.75057	0.99988	1	-0.99991	-0.80481	1	-0.98963	-0.69769	-0.9981	-0.98659	0.03662	0.51862	0.97471	-0.91447	0.93234	-0.75807	-0.84453	-0.08614
FtPinG0005111700.01	p-value	0.2156	0.45109	0.52275	0.1938	0.45956	0.00974	0.000922315	0.00862	0.40453	--	0.09177	0.50842	0.03921	0.10437	0.97668	0.65289	0.14349	0.26522	0.23552	0.45229	0.35976	0.94509
FtPinG0007313500.01	Pearson correlation	-0.98114	0.8449	-0.77947	0.98719	0.64785	-0.98731	-0.98983	0.99148	0.88173	-0.98963	1	0.58754	0.99659	0.9998	-0.17981	-0.39041	-0.93249	0.96312	-0.97462	0.65651	0.9127	0.22837
FtPinG0007313500.01	p-value	0.12383	0.35932	0.43097	0.10203	0.55134	0.10152	0.09085	0.08315	0.31276	0.09177	--	0.60019	0.05256	0.01259	0.88491	0.74467	0.23527	0.17344	0.14375	0.54406	0.26799	0.85332
FtPinG0005089800.01	Pearson correlation	-0.42006	0.06356	0.04894	0.45088	0.99706	-0.70858	-0.69666	0.68793	0.13631	-0.69769	0.58754	1	0.65228	0.57142	0.69036	-0.97436	-0.84016	0.34813	-0.39146	0.99612	0.20559	-0.65363
FtPinG0005089800.01	p-value	0.72402	0.95951	0.96883	0.70222	0.04886	0.49867	0.50934	0.51704	0.91295	0.50842	0.60019	--	0.54763	0.61278	0.5149	0.14448	0.36493	0.77363	0.74394	0.05613	0.86818	0.54649
FtPinG0003761600.01	Pearson correlation	-0.96186	0.7979	-0.72515	0.97066	0.70847	-0.99704	-0.99819	0.99885	0.83982	-0.9981	0.99659	0.65228	1	0.99477	-0.09806	-0.46501	-0.9591	0.93764	-0.95283	0.71648	0.87589	0.1473
FtPinG0003761600.01	p-value	0.17639	0.41188	0.48354	0.15459	0.49877	0.04895	0.03829	0.03059	0.36532	0.03921	0.05256	0.54763	--	0.06516	0.93747	0.6921	0.1827	0.22601	0.19631	0.4915	0.32055	0.90588
FtPinG0002524500.01	Pearson correlation	-0.98477	0.85531	-0.79171	0.99015	0.63266	-0.98398	-0.98683	0.98871	0.89089	-0.98659	0.9998	0.57142	0.99477	1	-0.19923	-0.37212	-0.92516	0.96825	-0.97885	0.64146	0.9206	0.24758
FtPinG0002524500.01	p-value	0.11123	0.34673	0.41838	0.08943	0.56393	0.11411	0.10344	0.09575	0.30016	0.10437	0.01259	0.61278	0.06516	--	0.87231	0.75726	0.24786	0.16085	0.13116	0.55666	0.25539	0.84073
FtPinG0005486000.01	Pearson correlation	0.36655	-0.67812	0.75638	-0.33448	0.63287	0.02132	0.03807	-0.05015	-0.6226	0.03662	-0.17981	0.69036	-0.09806	-0.19923	1	-0.83544	-0.18765	-0.43787	0.39548	0.62398	-0.56608	-0.99877
FtPinG0005486000.01	p-value	0.76108	0.52559	0.45393	0.78288	0.56376	0.98642	0.97576	0.96806	0.57215	0.97668	0.88491	0.5149	0.93747	0.87231	--	0.37043	0.87983	0.71146	0.74116	0.57103	0.61692	0.03159
FtPinG0009522600.01	Pearson correlation	0.2051	0.16262	-0.27241	-0.23849	-0.95424	0.53164	0.51738	-0.50699	0.09008	0.51862	-0.39041	-0.97436	-0.46501	-0.37212	-0.83544	1	0.69659	-0.12828	0.17438	-0.95076	0.01987	0.80716
FtPinG0009522600.01	p-value	0.86849	0.89601	0.82436	0.84669	0.19333	0.64315	0.65382	0.66151	0.94258	0.65289	0.74467	0.14448	0.6921	0.75726	0.37043	--	0.5094	0.91811	0.88842	0.2006	0.98735	0.40201
FtPinG0005089400.01	Pearson correlation	0.84509	-0.59464	0.50058	-0.8629	-0.87926	0.97801	0.97438	-0.97159	-0.65181	0.97471	-0.93249	-0.84016	-0.9591	-0.92516	-0.18765	0.69659	1	-0.8009	0.82795	-0.88465	-0.70349	0.1387
FtPinG0005089400.01	p-value	0.35909	0.59459	0.66624	0.33729	0.31607	0.13375	0.14442	0.15211	0.54802	0.14349	0.23527	0.36493	0.1827	0.24786	0.87983	0.5094	--	0.40871	0.37901	0.3088	0.50325	0.91141
FtPinG0002334500.01	Pearson correlation	-0.99696	0.95768	-0.91929	0.99371	0.41898	-0.90817	-0.91506	0.91986	0.97615	-0.91447	0.96312	0.34813	0.93764	0.96825	-0.43787	-0.12828	-0.8009	1	-0.99891	0.42932	0.98899	0.48192
FtPinG0002334500.01	p-value	0.04962	0.18588	0.25753	0.07142	0.72478	0.27496	0.26429	0.2566	0.13931	0.26522	0.17344	0.77363	0.22601	0.16085	0.71146	0.91811	0.40871	--	0.02969	0.71751	0.09454	0.67988
FtPinG0008419400.01	Pearson correlation	0.99951	-0.94321	0.89994	-0.99785	-0.46086	0.9267	0.93287	-0.93715	-0.96497	0.93234	-0.97462	-0.39146	-0.95283	-0.97885	0.39548	0.17438	0.82795	-0.99891	1	-0.47097	-0.98102	-0.44054
FtPinG0008419400.01	p-value	0.01992	0.21557	0.28723	0.04172	0.69508	0.24527	0.2346	0.2269	0.16901	0.23552	0.14375	0.74394	0.19631	0.13116	0.74116	0.88842	0.37901	0.02969	--	0.68781	0.12424	0.70957
FtPinG0007226700.01	Pearson correlation	-0.49834	0.15118	-0.0392	0.52773	0.99993	-0.76796	-0.75712	0.74917	0.22302	-0.75807	0.65651	0.99612	0.71648	0.64146	0.62398	-0.95076	-0.88465	0.42932	-0.47097	1	0.29096	-0.58446
FtPinG0007226700.01	p-value	0.66789	0.90338	0.97504	0.64609	0.00727	0.44255	0.45321	0.46091	0.85682	0.45229	0.54406	0.05613	0.4915	0.55666	0.57103	0.2006	0.3088	0.71751	0.68781	--	0.81205	0.60262
FtPinG0001770900.01	Pearson correlation	-0.97447	0.98973	-0.96741	0.96621	0.28001	-0.83624	-0.84531	0.8517	0.99753	-0.84453	0.9127	0.20559	0.87589	0.9206	-0.56608	0.01987	-0.70349	0.98899	-0.98102	0.29096	1	0.60626
FtPinG0001770900.01	p-value	0.14416	0.09134	0.16299	0.16596	0.81932	0.3695	0.35884	0.35114	0.04477	0.35976	0.26799	0.86818	0.32055	0.25539	0.61692	0.98735	0.50325	0.09454	0.12424	0.81205	--	0.58534
FtPinG0005105500.01	Pearson correlation	-0.41224	0.71374	-0.78789	0.3808	-0.59369	-0.07088	-0.08758	0.09962	0.66065	-0.08614	0.22837	-0.65363	0.1473	0.24758	-0.99877	0.80716	0.1387	0.48192	-0.44054	-0.58446	0.60626	1
FtPinG0005105500.01	p-value	0.72949	0.494	0.42235	0.75129	0.59534	0.95484	0.94417	0.93648	0.54056	0.94509	0.85332	0.54649	0.90588	0.84073	0.03159	0.40201	0.91141	0.67988	0.70957	0.60262	0.58534	--
