# Supplementary material for: Genome-wide investigation of WRKY transcription factors in Tartary buckwheat (Fagopyrum tataricum) and their potential roles in regulating growth and development
Source: PeerJ. 2020 Mar 5;8:e8727. doi: 10.7717/peerj.8727 (PMC7060923; doi:10.7717/peerj.8727)
Supplement: Table S1 [file peerj-08-8727-s001.xls]

## Sheet: WRKY gene information
Supplementary Table 1 List of the 76 FtWRKY genes identified in this study
Group	Gene	Gene ID	Gene ID in He et al.	Protein length	Mw(KDa)	pI	Location	Domain	Homologous	E-value	Similarity	Localization	Go Annotation
IIe	FtWRKY1	FtPinG0000171800.01.T01	FtPinG0000171800.01.T01	164	18.1945	6.22	Ft5	WRKY	WRKY transcription factor 18	1.93e-43	0.503106	Nuclear	GO:0008152;GO:0097659;GO:0044271;GO:0043170;GO:0006351;GO:0031323;GO:0090304;GO:0009889;GO:0010467;GO:0034654;GO:0044238;GO:0018130;GO:1901576;GO:0065007;GO:0009059;GO:0044237;GO:0050789;GO:0016070;GO:0032774;GO:0034641;GO:2000112;GO:1903506;GO:0046483;GO:0010468;GO:0019222;GO:0050794;GO:0006807;GO:1901360;GO:0019219;GO:0051171;GO:0071704;GO:0006139;GO:0034645;GO:0080090;GO:0060255;GO:0019438;GO:…
I	FtWRKY2	FtPinG0000299100.01.T01	FtPinG0000299100.01.T01	328	35.6646	9.88	Ft2	WRKY, Plant_zn_clust	WRKY transcription factor 15	2.26e-83	0.480114	Nuclear	GO:1901576;GO:0044238;GO:0090304;GO:0006351;GO:0043170;GO:0019219;GO:1901360;GO:1903506;GO:0032774;GO:0050789;GO:0044237;GO:0009059;GO:0044249;GO:0019438;GO:0060255;GO:0006139;GO:0071704;GO:0051171;GO:0006725;GO:0009058;GO:0051252;GO:1901362;GO:0018130;GO:0034654;GO:0010467;GO:0009889;GO:0031323;GO:0044271;GO:0097659;GO:0008152;GO:0006807;GO:0050794;GO:0019222;GO:0010468;GO:0046483;GO:2000112;GO:…
I	FtWRKY3	FtPinG0001428200.01.T01	FtPinG0001428200.01.T01	524	57.4751	6.58	Ft1	WRKY	WRKY transcription factor 24	7.86e-125	0.534146	Nuclear	GO:0016070;GO:2000112;GO:0034641;GO:0065007;GO:0050794;GO:0006807;GO:0046483;GO:0019222;GO:0010468;GO:0044271;GO:0031323;GO:0008152;GO:0097659;GO:0034654;GO:0010467;GO:0018130;GO:0009889;GO:0031326;GO:0006355;GO:0009987;GO:2001141;GO:0008150;GO:0010556;GO:0034645;GO:0044260;GO:0080090;GO:0032774;GO:0009059;GO:0044237;GO:0050789;GO:0019219;GO:1901360;GO:1903506;GO:0043170;GO:0006351;GO:0044238;GO:…
IIe	FtWRKY4	FtPinG0002493300.01.T01	FtPinG0002493300.01.T01	274	31.4257	5.77	Ft8	WRKY	WRKY transcription factor 28	7.26e-57	0.509709	Nuclear	GO:0050794;GO:0006807;GO:0019222;GO:0010468;GO:0046483;GO:2000112;GO:0034641;GO:0016070;GO:0065007;GO:0018130;GO:0034654;GO:0010467;GO:0009889;GO:0031323;GO:0044271;GO:0097659;GO:0008152;GO:0008150;GO:2001141;GO:0010556;GO:0031326;GO:0009987;GO:0006355;GO:0044260;GO:0080090;GO:0034645;GO:0019219;GO:1901360;GO:1903506;GO:0032774;GO:0050789;GO:0044237;GO:0009059;GO:1901576;GO:0044238;GO:0090304;GO:…
IId	FtWRKY5	FtPinG0003193100.01.T01	FtPinG0003193100.01.T01	305	34.3273	6.16	Ft3	WRKY	WRKY transcription factor 6	4.79e-40	0.375439	Nuclear	GO:0019438;GO:0044249;GO:0060255;GO:0006139;GO:0071704;GO:0051171;GO:0009058;GO:0006725;GO:1901362;GO:0051252;GO:0044238;GO:1901576;GO:0090304;GO:0006351;GO:0043170;GO:0019219;GO:1901360;GO:1903506;GO:0032774;GO:0044237;GO:0009059;GO:0050789;GO:0044260;GO:0080090;GO:0034645;GO:2001141;GO:0008150;GO:0010556;GO:0031326;GO:0009987;GO:0006355;GO:0034654;GO:0010467;GO:0018130;GO:0009889;GO:0044271;GO:…
I	FtWRKY6	FtPinG0001577500.01.T01	FtPinG0001577500.01.T01	131	14.2101	9.77	Ft7	WRKY, Plant_zn_clust	WRKY transcription factor 11	9.49e-37	0.587719	Nuclear	GO:0009058;GO:0006725;GO:1901362;GO:0051252;GO:0019438;GO:0044249;GO:0060255;GO:0006139;GO:0051171;GO:0071704;GO:0019219;GO:1901360;GO:1903506;GO:0032774;GO:0009059;GO:0044237;GO:0050789;GO:0044238;GO:1901576;GO:0090304;GO:0043170;GO:0006351;GO:2001141;GO:0008150;GO:0010556;GO:0031326;GO:0006355;GO:0009987;GO:0044260;GO:0080090;GO:0034645;GO:0050794;GO:0006807;GO:0046483;GO:0019222;GO:0010468;GO:…
III	FtWRKY7	FtPinG0004829100.01.T01	FtPinG0004829100.01.T01	199	22.167	9.27	Ft6	WRKY	WRKY transcription factor 49	5.39e-35	0.434555	Nuclear	GO:0051252;GO:1901362;GO:0006725;GO:0009058;GO:0051171;GO:0071704;GO:0006139;GO:0060255;GO:0044249;GO:0019438;GO:0050789;GO:0009059;GO:0044237;GO:0032774;GO:1903506;GO:1901360;GO:0019219;GO:0043170;GO:0006351;GO:0090304;GO:1901576;GO:0044238;GO:0006355;GO:0009987;GO:0031326;GO:0010556;GO:0008150;GO:2001141;GO:0034645;GO:0080090;GO:0044260;GO:0065007;GO:0034641;GO:2000112;GO:0016070;GO:0046483;GO:…
IId	FtWRKY8	FtPinG0001878200.01.T01	FtPinG0001878200.01.T01	293	30.6327	4.85	Ft7	WRKY	WRKY transcription factor 69	5.37e-63	0.464164	Nuclear	GO:0090304;GO:0044238;GO:1901576;GO:0043170;GO:0006351;GO:1903506;GO:1901360;GO:0019219;GO:0009059;GO:0044237;GO:0050789;GO:0032774;GO:0060255;GO:0019438;GO:0044249;GO:0051171;GO:0071704;GO:0006139;GO:0009058;GO:0006725;GO:1901362;GO:0051252;GO:0009889;GO:0010467;GO:0034654;GO:0018130;GO:0008152;GO:0097659;GO:0044271;GO:0031323;GO:0046483;GO:0010468;GO:0019222;GO:0050794;GO:0006807;GO:0065007;GO:…
IIc	FtWRKY9	FtPinG0005486000.01.T01	FtPinG0005486000.01.T01	583	62.963	6.45	Ft1	WRKY	WRKY transcription factor 20	3.6e-171	0.512545	Nuclear	GO:0044238;GO:1901576;GO:0090304;GO:0006351;GO:0043170;GO:1901360;GO:0019219;GO:1903506;GO:0032774;GO:0044237;GO:0009059;GO:0050789;GO:0019438;GO:0044249;GO:0060255;GO:0006139;GO:0071704;GO:0051171;GO:0009058;GO:0006725;GO:1901362;GO:0051252;GO:0010467;GO:0034654;GO:0018130;GO:0009889;GO:0044271;GO:0031323;GO:0097659;GO:0008152;GO:0006807;GO:0050794;GO:0010468;GO:0019222;GO:0046483;GO:0016070;GO:…
IIc	FtWRKY10	FtPinG0006017000.01.T01	FtPinG0006017000.01.T01	380	41.2229	8.89	Ft6	WRKY	WRKY transcription factor 40	1.89e-81	0.490323	Nuclear	GO:0060255;GO:0044249;GO:0019438;GO:0051171;GO:0071704;GO:0006139;GO:0006725;GO:0009058;GO:0051252;GO:1901362;GO:0090304;GO:1901576;GO:0044238;GO:0043170;GO:0006351;GO:1903506;GO:1901360;GO:0019219;GO:0050789;GO:0009059;GO:0044237;GO:0032774;GO:0080090;GO:0044260;GO:0034645;GO:0010556;GO:0008150;GO:2001141;GO:0006355;GO:0009987;GO:0031326;GO:0009889;GO:0018130;GO:0010467;GO:0034654;GO:0008152;GO:…
IId	FtWRKY11	FtPinG0001921200.01.T01	FtPinG0001921200.01.T01	509	55.1082	6.29	Ft7	WRKY	WRKY transcription factor 6	2.36e-89	0.432323	Nuclear	GO:0009084;GO:1901564;GO:0016053;GO:1901566;GO:0044281;GO:0034645;GO:0080090;GO:0044260;GO:0044710;GO:0006355;GO:0009987;GO:0031326;GO:0010556;GO:0032501;GO:2001141;GO:0008150;GO:0046660;GO:0044283;GO:0008152;GO:0097659;GO:1901605;GO:0044271;GO:0006542;GO:1901607;GO:0031323;GO:0006082;GO:0009889;GO:0010467;GO:0034654;GO:0018130;GO:0044699;GO:0065007;GO:0016070;GO:0034641;GO:2000112;GO:0008652;GO:…
III	FtWRKY12	FtPinG0003025100.01.T01	FtPinG0003025100.01.T01	303	32.6528	5.84	Ft8	WRKY	WRKY transcription factor 65	8.08e-57	0.437276	Nuclear	GO:0008150;GO:2001141;GO:0010556;GO:0031326;GO:0006355;GO:0009987;GO:0044260;GO:0080090;GO:0034645;GO:0006807;GO:0050794;GO:0046483;GO:0010468;GO:0019222;GO:0034641;GO:2000112;GO:0016070;GO:0065007;GO:0018130;GO:0010467;GO:0034654;GO:0009889;GO:0031323;GO:0044271;GO:0008152;GO:0097659;GO:0006725;GO:0009058;GO:0051252;GO:1901362;GO:0044249;GO:0019438;GO:0060255;GO:0006139;GO:0051171;GO:0071704;GO:…
IId	FtWRKY13	FtPinG0004319300.01.T01	FtPinG0004319300.01.T01	177	20.397	9.41	Ft5	WRKY	WRKY transcription factor 13	8.57e-61	0.811966	Nuclear	GO:0043170;GO:0006351;GO:1901576;GO:0044238;GO:0090304;GO:0032774;GO:0050789;GO:0044237;GO:0009059;GO:1901360;GO:0019219;GO:1903506;GO:0006139;GO:0071704;GO:0051171;GO:0044249;GO:0019438;GO:0060255;GO:0051252;GO:1901362;GO:0006725;GO:0009058;GO:0031323;GO:0044271;GO:0097659;GO:0008152;GO:0018130;GO:0010467;GO:0034654;GO:0009889;GO:0034641;GO:2000112;GO:0016070;GO:0065007;GO:0050794;GO:0006807;GO:…
IIc	FtWRKY14	FtPinG0008726200.01.T01	FtPinG0008726200.01.T01	279	31.2172	5.97	Ft3	WRKY	WRKY transcription factor 53	1.6e-36	0.375	Nuclear	GO:0043170;GO:0006351;GO:0044238;GO:1901576;GO:0090304;GO:0032774;GO:0009059;GO:0044237;GO:0050789;GO:0019219;GO:1901360;GO:1903506;GO:0006139;GO:0051171;GO:0071704;GO:0019438;GO:0044249;GO:0060255;GO:1901362;GO:0051252;GO:0009058;GO:0006725;GO:0044271;GO:0031323;GO:0008152;GO:0097659;GO:0034654;GO:0010467;GO:0018130;GO:0009889;GO:0016070;GO:2000112;GO:0034641;GO:0065007;GO:0050794;GO:0006807;GO:…
IIc	FtWRKY15	FtPinG0005008400.01.T01	FtPinG0005008400.01.T01	179	20.1591	6.21	Ft2	WRKY	WRKY transcription factor 50	1.19e-42	0.536232	Nuclear	GO:0044085;GO:0031326;GO:0006355;GO:0009987;GO:2001141;GO:0008150;GO:0010556;GO:0034645;GO:0044260;GO:0080090;GO:0016070;GO:0034641;GO:2000112;GO:0065007;GO:0050794;GO:0006807;GO:0046483;GO:0010468;GO:0019222;GO:0044271;GO:0031323;GO:0008152;GO:0097659;GO:0010467;GO:0034654;GO:0042254;GO:0018130;GO:0009889;GO:1901362;GO:0051252;GO:0009058;GO:0006725;GO:0006139;GO:0051171;GO:0071704;GO:0019438;GO:…
IIa	FtWRKY16	FtPinG0005548400.01.T01	FtPinG0005548400.01.T01	539	57.6125	8.9	Ft3	WRKY	WRKY transcription factor 72	8.31e-76	0.399225	Nuclear	GO:0006351;GO:0043170;GO:0044238;GO:1901576;GO:0090304;GO:0032774;GO:0044237;GO:0009059;GO:0050789;GO:0019219;GO:1901360;GO:1903506;GO:0006139;GO:0071704;GO:0051171;GO:0019438;GO:0044249;GO:0060255;GO:1901362;GO:0051252;GO:0009058;GO:0006725;GO:0044271;GO:0031323;GO:0097659;GO:0008152;GO:0034654;GO:0010467;GO:0018130;GO:0009889;GO:0016070;GO:2000112;GO:0034641;GO:0065007;GO:0006807;GO:0050794;GO:…
IIe	FtWRKY17	FtPinG0006962300.01.T01	FtPinG0006962300.01.T01	176	20.1442	9.88	Ft1	WRKY, Plant_zn_clust	WRKY transcription factor 74	5.15e-70	0.706667	Nuclear	GO:1901362;GO:0051252;GO:0009058;GO:0006725;GO:0006139;GO:0051171;GO:0071704;GO:0019438;GO:0044249;GO:0060255;GO:0032774;GO:0009059;GO:0044237;GO:0050789;GO:0019219;GO:1901360;GO:1903506;GO:0043170;GO:0006351;GO:0044238;GO:1901576;GO:0090304;GO:0031326;GO:0006355;GO:0009987;GO:2001141;GO:0008150;GO:0010556;GO:0034645;GO:0044260;GO:0080090;GO:0016070;GO:2000112;GO:0034641;GO:0065007;GO:0050794;GO:…
IId	FtWRKY18	FtPinG0007313500.01.T01	FtPinG0007313500.01.T01	172	19.8598	8.97	Ft5	WRKY	WRKY transcription factor 75	7.63e-56	0.847826	Nuclear	GO:0032774;GO:0050789;GO:0044237;GO:0009059;GO:1901360;GO:0019219;GO:1903506;GO:0043170;GO:0006351;GO:1901576;GO:0044238;GO:0090304;GO:0051252;GO:1901362;GO:0006725;GO:0009058;GO:0006139;GO:0071704;GO:0051171;GO:0044249;GO:0019438;GO:0060255;GO:0034641;GO:2000112;GO:0016070;GO:0065007;GO:0050794;GO:0006807;GO:0010468;GO:0019222;GO:0046483;GO:0031323;GO:0044271;GO:0097659;GO:0008152;GO:0018130;GO:…
I	FtWRKY19	FtPinG0004914600.01.T01	FtPinG0004914600.01.T01	576	62.4012	6.66	Ft5	WRKY	WRKY transcription factor 42	3.5e-137	0.504798	Nuclear	GO:1903506;GO:0019219;GO:1901360;GO:0044237;GO:0009059;GO:0050789;GO:0032774;GO:0090304;GO:0044238;GO:1901576;GO:0006351;GO:0043170;GO:0009058;GO:0006725;GO:1901362;GO:0051252;GO:0060255;GO:0019438;GO:0044249;GO:0071704;GO:0051171;GO:0006139;GO:0019222;GO:0010468;GO:0046483;GO:0006807;GO:0050794;GO:0065007;GO:0016070;GO:2000112;GO:0034641;GO:0009889;GO:0034654;GO:0010467;GO:0018130;GO:0097659;GO:…
IId	FtWRKY20	FtPinG0003001300.01.T01	FtPinG0003001300.01.T01	336	37.2721	6.82	Ft1	WRKY	WRKY transcription factor 70	4.44e-32	0.402985	Nuclear	GO:0065007;GO:2000112;GO:0034641;GO:0016070;GO:0046483;GO:0019222;GO:0010468;GO:0050794;GO:0006807;GO:0008152;GO:0097659;GO:0031323;GO:0044271;GO:0009889;GO:0018130;GO:0034654;GO:0010467;GO:0006355;GO:0009987;GO:0031326;GO:0010556;GO:0008150;GO:2001141;GO:0034645;GO:0080090;GO:0044260;GO:0050789;GO:0009059;GO:0044237;GO:0032774;GO:1903506;GO:0019219;GO:1901360;GO:0043170;GO:0006351;GO:0090304;GO:…
IIe	FtWRKY21	FtPinG0003701200.01.T01	FtPinG0003701200.01.T01	322	35.8372	6.96	Ft2	WRKY	WRKY transcription factor 40	8.84e-78	0.439528	Nuclear	GO:0060255;GO:0080090;GO:0044249;GO:0019438;GO:0044260;GO:0051171;GO:0071704;GO:0006139;GO:0034645;GO:0010556;GO:0008150;GO:0006725;GO:0009058;GO:2001141;GO:0051252;GO:0006355;GO:0009987;GO:1901362;GO:0031326;GO:0009889;GO:0090304;GO:0018130;GO:1901576;GO:0010467;GO:0034654;GO:0044238;GO:0008152;GO:0097659;GO:0031323;GO:0006351;GO:0044271;GO:0043170;GO:0046483;GO:0010468;GO:0019222;GO:1903506;GO:…
IId	FtWRKY22	FtPinG0003722700.01.T01	FtPinG0003722700.01.T01	287	31.8636	6.66	Ft3	WRKY	WRKY transcription factor 23	2.39e-54	0.492248	Nuclear	GO:0006807;GO:0050794;GO:0010468;GO:0019222;GO:0046483;GO:0034641;GO:2000112;GO:0016070;GO:0065007;GO:0044699;GO:0018130;GO:0010467;GO:0034654;GO:0009889;GO:0031323;GO:0044271;GO:0097659;GO:0007018;GO:0008152;GO:0008150;GO:2001141;GO:0010556;GO:0031326;GO:0009987;GO:0006355;GO:0044260;GO:0080090;GO:0006928;GO:0034645;GO:1901360;GO:0019219;GO:1903506;GO:0032774;GO:0050789;GO:0044237;GO:0009059;GO:…
IIb	FtWRKY23	FtPinG0003761600.01.T01	FtPinG0003761600.01.T01	495	53.8735	7.09	Ft4	WRKY	WRKY transcription factor 4	3.06e-127	0.469697	Nuclear	GO:0080090;GO:0016570;GO:0044260;GO:0034645;GO:0006996;GO:0010556;GO:2001141;GO:0008150;GO:0016569;GO:0044710;GO:0009987;GO:0006355;GO:0031326;GO:0009889;GO:0010467;GO:0034654;GO:0044699;GO:0018130;GO:0097659;GO:0008152;GO:0044271;GO:0016043;GO:0031323;GO:0010468;GO:0019222;GO:0046483;GO:0050794;GO:0006807;GO:0018193;GO:0018205;GO:0065007;GO:0036211;GO:0016070;GO:0034641;GO:0018394;GO:2000112;GO:…
I	FtWRKY24	FtPinG0003815100.01.T01	FtPinG0006884300.01.T01	549	60.095	5.92	Ft5	WRKY	WRKY transcription factor 20	2.86e-137	0.458955	Nuclear	GO:1901362;GO:0051252;GO:0009058;GO:0006725;GO:0006139;GO:0051171;GO:0071704;GO:0019438;GO:0044249;GO:0060255;GO:0032774;GO:0009059;GO:0044237;GO:0050789;GO:0019219;GO:1901360;GO:1903506;GO:0043170;GO:0006351;GO:0044238;GO:1901576;GO:0090304;GO:0031326;GO:0006355;GO:0009987;GO:2001141;GO:0008150;GO:0010556;GO:0034645;GO:0044260;GO:0080090;GO:0016070;GO:2000112;GO:0034641;GO:0065007;GO:0050794;GO:…
IIe	FtWRKY25	FtPinG0004814300.01.T01	FtPinG0003815100.01.T01	295	33.4063	9.54	Ft2	WRKY, Plant_zn_clust	WRKY transcription factor 74	5.42e-77	0.437126	Nuclear	GO:0032774;GO:0009059;GO:0044237;GO:0050789;GO:1901360;GO:0019219;GO:1903506;GO:0043170;GO:0006351;GO:0044238;GO:1901576;GO:0090304;GO:1901362;GO:0051252;GO:0009058;GO:0006725;GO:0006139;GO:0051171;GO:0071704;GO:0019438;GO:0044249;GO:0060255;GO:0016070;GO:0034641;GO:2000112;GO:0065007;GO:0050794;GO:0006807;GO:0046483;GO:0010468;GO:0019222;GO:0044271;GO:0031323;GO:0008152;GO:0097659;GO:0010467;GO:…
IIc	FtWRKY26	FtPinG0006083600.01.T01	FtPinG0004814300.01.T01	331	36.0556	9.62	Ft2	WRKY, Plant_zn_clust	WRKY transcription factor 11	3.78e-105	0.548485	Nuclear	GO:1901362;GO:0051252;GO:0009058;GO:0006725;GO:0006139;GO:0051171;GO:0071704;GO:0019438;GO:0044249;GO:0060255;GO:0032774;GO:0009059;GO:0044237;GO:0050789;GO:1901360;GO:0019219;GO:1903506;GO:0006351;GO:0043170;GO:0044238;GO:1901576;GO:0090304;GO:0031326;GO:0006355;GO:0009987;GO:2001141;GO:0008150;GO:0010556;GO:0034645;GO:0044260;GO:0080090;GO:0016070;GO:0034641;GO:2000112;GO:0065007;GO:0006807;GO:…
IIc	FtWRKY27	FtPinG0007458900.01.T01	FtPinG0006083600.01.T01	156	17.3037	10.04	Ft3	WRKY, Plant_zn_clust	WRKY transcription factor 21	7.79e-76	0.703226	Nuclear	GO:0051171;GO:0071704;GO:0006139;GO:0060255;GO:0044249;GO:0019438;GO:0051252;GO:1901362;GO:0006725;GO:0009058;GO:0043170;GO:0006351;GO:0090304;GO:1901576;GO:0044238;GO:0050789;GO:0009059;GO:0044237;GO:0032774;GO:1903506;GO:0019219;GO:1901360;GO:0034645;GO:0080090;GO:0044260;GO:0006355;GO:0009987;GO:0031326;GO:0010556;GO:0008150;GO:2001141;GO:0008152;GO:0097659;GO:0031323;GO:0044271;GO:0009889;GO:…
IIe	FtWRKY28	FtPinG0005089800.01.T01	FtPinG0007458900.01.T01	549	59.5072	5.84	Ft8	WRKY	WRKY transcription factor 6	8.03e-134	0.493377	Nuclear	GO:0006139;GO:0051171;GO:0071704;GO:0019438;GO:0044249;GO:0060255;GO:1901362;GO:0051252;GO:0009058;GO:0006725;GO:0043170;GO:0006351;GO:0044238;GO:1901576;GO:0090304;GO:0032774;GO:0009059;GO:0044237;GO:0050789;GO:0019219;GO:1901360;GO:1903506;GO:0034645;GO:0044260;GO:0080090;GO:0031326;GO:0006355;GO:0009987;GO:2001141;GO:0008150;GO:0010556;GO:0044271;GO:0031323;GO:0008152;GO:0097659;GO:0034654;GO:…
IIc	FtWRKY29	FtPinG0005089400.01.T01	FtPinG0005089800.01.T01	229	26.1222	8.22	Ft3	WRKY	WRKY transcription factor 27	1.19e-26	0.479675	Nuclear	GO:0051252;GO:1901362;GO:0006725;GO:0009058;GO:0051171;GO:0071704;GO:0006139;GO:0060255;GO:0044249;GO:0019438;GO:0050789;GO:0009059;GO:0044237;GO:0032774;GO:1903506;GO:0019219;GO:1901360;GO:0043170;GO:0006351;GO:0090304;GO:1901576;GO:0044238;GO:0006355;GO:0009987;GO:0031326;GO:0010556;GO:0008150;GO:2001141;GO:0034645;GO:0080090;GO:0044260;GO:0065007;GO:2000112;GO:0034641;GO:0016070;GO:0046483;GO:…
Ⅲ	FtWRKY30	FtPinG0006388000.01.T01	FtPinG0005089400.01.T01	292	31.7843	6.44	Ft3	WRKY	WRKY transcription factor 23	3.55e-59	0.502392	Nuclear	GO:0018130;GO:0034654;GO:0010467;GO:0009889;GO:0031323;GO:0044271;GO:0097659;GO:0008152;GO:0050794;GO:0006807;GO:0019222;GO:0010468;GO:0046483;GO:2000112;GO:0034641;GO:0016070;GO:0065007;GO:0044260;GO:0080090;GO:0034645;GO:0008150;GO:2001141;GO:0010556;GO:0031326;GO:0009987;GO:0006355;GO:1901576;GO:0044238;GO:0090304;GO:0043170;GO:0006351;GO:0019219;GO:1901360;GO:1903506;GO:0032774;GO:0050789;GO:…
IIc	FtWRKY31	FtPinG0000403800.01.T01	FtPinG0006388000.01.T01	491	53.7877	7	Ft4	WRKY	WRKY transcription factor 4	2.72e-146	0.533597	Nuclear	GO:0006351;GO:0043170;GO:0044238;GO:1901576;GO:0090304;GO:0032774;GO:0009059;GO:0044237;GO:0050789;GO:1901360;GO:0019219;GO:1903506;GO:0006139;GO:0051171;GO:0071704;GO:0019438;GO:0044249;GO:0060255;GO:1901362;GO:0051252;GO:0009058;GO:0006725;GO:0044271;GO:0031323;GO:0008152;GO:0097659;GO:0010467;GO:0034654;GO:0018130;GO:0009889;GO:0016070;GO:0034641;GO:2000112;GO:0065007;GO:0006807;GO:0050794;GO:…
IId	FtWRKY32	FtPinG0001732900.01.T01	FtPinG0000403800.01.T01	538	57.5896	6.41	Ft2	WRKY	WRKY transcription factor 42	5.37e-136	0.505952	Nuclear	GO:0031326;GO:0006355;GO:0009987;GO:0008150;GO:2001141;GO:0010556;GO:0034645;GO:0044260;GO:0080090;GO:0034641;GO:2000112;GO:0016070;GO:0065007;GO:0006807;GO:0050794;GO:0046483;GO:0010468;GO:0019222;GO:0031323;GO:0044271;GO:0008152;GO:0097659;GO:0018130;GO:0010467;GO:0034654;GO:0009889;GO:0051252;GO:1901362;GO:0006725;GO:0009058;GO:0006139;GO:0051171;GO:0071704;GO:0044249;GO:0019438;GO:0060255;GO:…
IIb	FtWRKY33	FtPinG0004464200.01.T01	FtPinG0001732900.01.T01	294	32.3462	5.36	Ft1	WRKY	WRKY transcription factor 49	2.99e-46	0.382353	Nuclear	GO:0000097;GO:0010556;GO:0006996;GO:0044283;GO:0019068;GO:0008150;GO:2001141;GO:0006355;GO:0051301;GO:0009987;GO:0044710;GO:0000280;GO:0006886;GO:0009070;GO:0031326;GO:0031110;GO:0071702;GO:0031109;GO:0044085;GO:0007010;GO:0044272;GO:0080090;GO:0033043;GO:0044260;GO:0006810;GO:1901566;GO:0007059;GO:0034613;GO:0044281;GO:0044848;GO:0007049;GO:1901564;GO:0016053;GO:0006259;GO:0034645;GO:0048285;GO:…
IIb	FtWRKY34	FtPinG0004460400.01.T01	FtPinG0004464200.01.T01	322	36.2417	5.24	Ft5	WRKY	WRKY transcription factor 46	4.5e-35	0.341463	Nuclear	GO:1901362;GO:0051252;GO:0009058;GO:0006725;GO:0071704;GO:0051171;GO:0006139;GO:0060255;GO:0019438;GO:0044249;GO:0044237;GO:0009059;GO:0050789;GO:0032774;GO:1903506;GO:0019219;GO:1901360;GO:0006351;GO:0043170;GO:0090304;GO:0044238;GO:1901576;GO:0009987;GO:0006355;GO:0031326;GO:0010556;GO:2001141;GO:0008150;GO:0034645;GO:0080090;GO:0044260;GO:0065007;GO:0016070;GO:2000112;GO:0034641;GO:0019222;GO:…
IIe	FtWRKY35	FtPinG0002374400.01.T01	FtPinG0004460400.01.T01	173	19.9527	9.3	Ft1	WRKY	WRKY transcription factor 75	5.68e-50	0.777778	Nuclear	GO:0019219;GO:1901360;GO:1903506;GO:0032774;GO:0044237;GO:0009059;GO:0050789;GO:0044238;GO:1901576;GO:0090304;GO:0043170;GO:0006351;GO:0009058;GO:0006725;GO:1901362;GO:0051252;GO:0019438;GO:0044249;GO:0060255;GO:0006139;GO:0071704;GO:0051171;GO:0050794;GO:0006807;GO:0019222;GO:0010468;GO:0046483;GO:0016070;GO:2000112;GO:0034641;GO:0065007;GO:0034654;GO:0010467;GO:0018130;GO:0009889;GO:0044271;GO:…
IIb	FtWRKY36	FtPinG0006311800.01.T01	FtPinG0002374400.01.T01	140	16.0398	7.67	Ft8	WRKY	WRKY transcription factor 50	1.05e-35	0.702703	Nuclear	GO:0009889;GO:0034654;GO:0010467;GO:0044699;GO:0018130;GO:0097659;GO:0008152;GO:0044271;GO:0031323;GO:0019222;GO:0010468;GO:0046483;GO:0006807;GO:0050794;GO:0065007;GO:0016070;GO:2000112;GO:0034641;GO:0080090;GO:0044260;GO:0007049;GO:0034645;GO:0010556;GO:2001141;GO:0008150;GO:0009987;GO:0006355;GO:0031326;GO:0090304;GO:0044238;GO:1901576;GO:0006351;GO:0044763;GO:0043170;GO:1903506;GO:0019219;GO:…
IIc	FtWRKY37	FtPinG0008419400.01.T01	FtPinG0006311800.01.T01	249	28.4091	6.72	Ft2	WRKY	WRKY transcription factor 27	5.94e-37	0.655914	Nuclear	GO:0044271;GO:0031323;GO:0008152;GO:0097659;GO:0034654;GO:0010467;GO:0018130;GO:0009889;GO:0016070;GO:2000112;GO:0034641;GO:0065007;GO:0050794;GO:0006807;GO:0046483;GO:0019222;GO:0010468;GO:0034645;GO:0044260;GO:0080090;GO:0031326;GO:0006355;GO:0009987;GO:2001141;GO:0008150;GO:0010556;GO:0043170;GO:0006351;GO:0044238;GO:1901576;GO:0090304;GO:0032774;GO:0009059;GO:0044237;GO:0050789;GO:0019219;GO:…
III	FtWRKY38	FtPinG0007629700.01.T01	FtPinG0008419400.01.T01	247	26.6782	8.25	Ft5	WRKY	WRKY transcription factor 42	2.25e-83	0.606426	Nuclear	GO:0090304;GO:0009889;GO:0010467;GO:0034654;GO:0044238;GO:0018130;GO:1901576;GO:0008152;GO:0097659;GO:0006351;GO:0044271;GO:0043170;GO:0031323;GO:1903506;GO:0046483;GO:0010468;GO:0019222;GO:0006807;GO:0050794;GO:1901360;GO:0019219;GO:0009059;GO:0065007;GO:0044237;GO:0050789;GO:0032774;GO:0016070;GO:0034641;GO:2000112;GO:0080090;GO:0060255;GO:0019438;GO:0044260;GO:0044249;GO:0051171;GO:0071704;GO:…
I	FtWRKY39	FtPinG0005111700.01.T01	FtPinG0007629700.01.T01	320	35.1824	8.84	Ft2	WRKY	WRKY transcription factor 44	3.11e-14	0.545455	Nuclear	GO:0090304;GO:0044238;GO:1901576;GO:0043170;GO:0006351;GO:1903506;GO:0019219;GO:1901360;GO:0009059;GO:0044237;GO:0050789;GO:0032774;GO:0060255;GO:0019438;GO:0044249;GO:0051171;GO:0071704;GO:0006139;GO:0009058;GO:0006725;GO:1901362;GO:0051252;GO:0009889;GO:0034654;GO:0010467;GO:0018130;GO:0008152;GO:0097659;GO:0044271;GO:0031323;GO:0046483;GO:0019222;GO:0010468;GO:0050794;GO:0006807;GO:0065007;GO:…
IIb	FtWRKY40	FtPinG0005105500.01.T01	FtPinG0005111700.01.T01	477	52.1915	9.23	Ft2	WRKY	WRKY transcription factor 32	3.17e-62	0.381089	Nuclear	GO:0090304;GO:1901576;GO:0044238;GO:0006351;GO:0043170;GO:1903506;GO:1901360;GO:0019219;GO:0050789;GO:0044237;GO:0009059;GO:0032774;GO:0060255;GO:0044249;GO:0019438;GO:0071704;GO:0051171;GO:0006139;GO:0006725;GO:0009058;GO:0051252;GO:1901362;GO:0009889;GO:0018130;GO:0010467;GO:0034654;GO:0097659;GO:0008152;GO:0031323;GO:0044271;GO:0010468;GO:0019222;GO:0046483;GO:0006807;GO:0050794;GO:0065007;GO:…
I	FtWRKY41	FtPinG0006617300.01.T01	FtPinG0005105500.01.T01	181	20.755	9.13	Ft7	WRKY	WRKY transcription factor 58	2.29e-08	0.458333	Nuclear	GO:0031326;GO:0006355;GO:0009966;GO:0009987;GO:2001141;GO:0008150;GO:0010556;GO:0034645;GO:0051716;GO:0044260;GO:0051056;GO:0080090;GO:0016070;GO:0023051;GO:0034641;GO:2000112;GO:0065007;GO:0007264;GO:0035556;GO:0050794;GO:0006807;GO:0048583;GO:0046483;GO:0010468;GO:0019222;GO:0044271;GO:1902531;GO:0031323;GO:0008152;GO:0097659;GO:0010467;GO:0034654;GO:0018130;GO:0044699;GO:0009889;GO:0007154;GO:…
IIc	FtWRKY42	FtPinG0000497200.01.T01	FtPinG0006617300.01.T01	460	49.7092	6.58	Ft5	WRKY	WRKY transcription factor 3	8.64e-147	0.528195	Nuclear	GO:0044271;GO:0031323;GO:0097659;GO:0008152;GO:0010467;GO:0034654;GO:0018130;GO:0009889;GO:0016070;GO:0034641;GO:2000112;GO:0065007;GO:0006807;GO:0050794;GO:0010468;GO:0019222;GO:0046483;GO:0034645;GO:0044260;GO:0080090;GO:0031326;GO:0009987;GO:0006355;GO:2001141;GO:0008150;GO:0010556;GO:0006351;GO:0043170;GO:0044238;GO:1901576;GO:0090304;GO:0032774;GO:0044237;GO:0009059;GO:0050789;GO:1901360;GO:…
III	FtWRKY43	FtPinG0002524500.01.T01	FtPinG0000497200.01.T01	193	21.7393	9.05	Ft3	WRKY	WRKY transcription factor 24	4.88e-54	0.713043	Nuclear	GO:1901576;GO:0044238;GO:0090304;GO:0043170;GO:0006351;GO:0019219;GO:1901360;GO:1903506;GO:0032774;GO:0050789;GO:0009059;GO:0044237;GO:0044249;GO:0019438;GO:0060255;GO:0006139;GO:0051171;GO:0071704;GO:0006725;GO:0009058;GO:0051252;GO:1901362;GO:0018130;GO:0034654;GO:0010467;GO:0009889;GO:0031323;GO:0044271;GO:0008152;GO:0097659;GO:0050794;GO:0006807;GO:0046483;GO:0019222;GO:0010468;GO:2000112;GO:…
I	FtWRKY44	FtPinG0004671500.01.T01	FtPinG0002524500.01.T01	290	32.2648	6.66	Ft3	WRKY	WRKY transcription factor 14	5.95e-59	0.491803	Nuclear	GO:0006725;GO:0008150;GO:0009058;GO:2001141;GO:0010556;GO:0031326;GO:0009987;GO:0051252;GO:0006355;GO:1901362;GO:0044249;GO:0044260;GO:0019438;GO:0060255;GO:0080090;GO:0034645;GO:0006139;GO:0071704;GO:0051171;GO:0019219;GO:1901360;GO:0006807;GO:0050794;GO:0019222;GO:0010468;GO:0046483;GO:1903506;GO:2000112;GO:0034641;GO:0016070;GO:0032774;GO:0050789;GO:0044237;GO:0009059;GO:0065007;GO:1901576;GO:…
I	FtWRKY45	FtPinG0004682800.01.T01	FtPinG0004671500.01.T01	273	29.5463	5.7	Ft1	WRKY	WRKY transcription factor 65	4.31e-62	0.444015	Nuclear	GO:0090304;GO:0034660;GO:0043436;GO:0044238;GO:1901576;GO:0043038;GO:0006399;GO:0043170;GO:0006351;GO:0044763;GO:1903506;GO:0044267;GO:0019752;GO:0019219;GO:1901360;GO:0044237;GO:0009059;GO:0050789;GO:0006412;GO:0032774;GO:0019538;GO:0060255;GO:0019438;GO:0044249;GO:0043043;GO:0071704;GO:0051171;GO:0043039;GO:0006139;GO:0006520;GO:0009058;GO:0006725;GO:1901362;GO:0051252;GO:0043603;GO:0006082;GO:…
IIb	FtWRKY46	FtPinG0001532600.01.T01	FtPinG0004682800.01.T01	327	35.4921	9.69	Ft8	WRKY, Plant_zn_clust	WRKY transcription factor 7	1.03e-101	0.49734	Nuclear	GO:0051171;GO:0071704;GO:0006139;GO:0060255;GO:0044249;GO:0019438;GO:0051252;GO:1901362;GO:0006725;GO:0009058;GO:0043170;GO:0006351;GO:0090304;GO:1901576;GO:0044238;GO:0050789;GO:0009059;GO:0044237;GO:0032774;GO:1903506;GO:1901360;GO:0019219;GO:0034645;GO:0080090;GO:0044260;GO:0006355;GO:0009987;GO:0031326;GO:0010556;GO:0008150;GO:2001141;GO:0008152;GO:0097659;GO:0031323;GO:0044271;GO:0009889;GO:…
IIc	FtWRKY47	FtPinG0004237400.01.T01	FtPinG0001532600.01.T01	275	30.4778	9.04	Ft2	WRKY	WRKY transcription factor 71	9.56e-58	0.459459	Nuclear	GO:0009058;GO:0006725;GO:1901362;GO:0051252;GO:0019438;GO:0044249;GO:0060255;GO:0006139;GO:0071704;GO:0051171;GO:0019219;GO:1901360;GO:1903506;GO:0032774;GO:0044237;GO:0009059;GO:0050789;GO:0044238;GO:1901576;GO:0090304;GO:0006351;GO:0043170;GO:2001141;GO:0008150;GO:0010556;GO:0031326;GO:0009987;GO:0006355;GO:0044260;GO:0080090;GO:0034645;GO:0006807;GO:0050794;GO:0019222;GO:0010468;GO:0046483;GO:…
IIc	FtWRKY48	FtPinG0007732600.01.T01	FtPinG0004237400.01.T01	264	29.1608	9.62	Ft1	WRKY, Plant_zn_clust	WRKY transcription factor 21	4.73e-09	0.681564	Nuclear	GO:0034645;GO:0044260;GO:0080090;GO:0031326;GO:0006355;GO:0009987;GO:0008150;GO:2001141;GO:0010556;GO:0031323;GO:0044271;GO:0008152;GO:0097659;GO:0018130;GO:0010467;GO:0034654;GO:0009889;GO:0034641;GO:2000112;GO:0016070;GO:0065007;GO:0050794;GO:0006807;GO:0046483;GO:0010468;GO:0019222;GO:0006139;GO:0051171;GO:0071704;GO:0044249;GO:0019438;GO:0060255;GO:0051252;GO:1901362;GO:0006725;GO:0009058;GO:…
IIb	FtWRKY49	FtPinG0006202300.01.T01	FtPinG0007732600.01.T01	154	17.1337	5.96	Ft1	WRKY	WRKY transcription factor 20	6.07e-15	0.458065	Nuclear	GO:0006355;GO:0009987;GO:0031326;GO:0010556;GO:2001141;GO:0008150;GO:0034645;GO:0080090;GO:0044260;GO:0065007;GO:0016070;GO:2000112;GO:0034641;GO:0046483;GO:0019222;GO:0010468;GO:0006807;GO:0050794;GO:0008152;GO:0097659;GO:0044271;GO:0031323;GO:0009889;GO:0034654;GO:0010467;GO:0018130;GO:1901362;GO:0051252;GO:0009058;GO:0006725;GO:0051171;GO:0071704;GO:0006139;GO:0060255;GO:0019438;GO:0044249;GO:…
IIb	FtWRKY50	FtPinG0006201300.01.T01	FtPinG0006202300.01.T01	723	78.74	5.59	Ft8	WRKY	WRKY transcription factor 2	1.35e-98	0.41556	Nuclear	GO:0019438;GO:0044249;GO:0060255;GO:0006139;GO:0051171;GO:0071704;GO:0009058;GO:0006725;GO:1901362;GO:0051252;GO:0044238;GO:1901576;GO:0090304;GO:0043170;GO:0006351;GO:0019219;GO:1901360;GO:1903506;GO:0032774;GO:0009059;GO:0044237;GO:0050789;GO:0044260;GO:0080090;GO:0034645;GO:2001141;GO:0008150;GO:0010556;GO:0031326;GO:0006355;GO:0009987;GO:0034654;GO:0010467;GO:0018130;GO:0009889;GO:0044271;GO:…
IIc	FtWRKY51	FtPinG0002688700.01.T01	FtPinG0006201300.01.T01	204	22.7591	9.65	Ft7	WRKY	WRKY transcription factor 20	8.73e-13	0.710526	Nuclear	GO:0044238;GO:1901576;GO:0090304;GO:0006351;GO:0043170;GO:0019219;GO:1901360;GO:1903506;GO:0032774;GO:0009059;GO:0044237;GO:0050789;GO:0019438;GO:0044249;GO:0060255;GO:0006139;GO:0051171;GO:0071704;GO:0009058;GO:0006725;GO:1901362;GO:0051252;GO:0034654;GO:0010467;GO:0018130;GO:0009889;GO:0044271;GO:0031323;GO:0008152;GO:0097659;GO:0006807;GO:0050794;GO:0046483;GO:0019222;GO:0010468;GO:0016070;GO:…
IId	FtWRKY52	FtPinG0002710400.01.T01	FtPinG0002688700.01.T01	185	20.4753	5.26	Ft7	WRKY	WRKY transcription factor 22	2.3e-54	0.513966	Nuclear	GO:0009987;GO:0006355;GO:0031326;GO:0010556;GO:2001141;GO:0008150;GO:0034645;GO:0080090;GO:0044260;GO:0065007;GO:0016070;GO:2000112;GO:0034641;GO:0019222;GO:0010468;GO:0046483;GO:0050794;GO:0006807;GO:0097659;GO:0008152;GO:0044271;GO:0031323;GO:0009889;GO:0034654;GO:0010467;GO:0018130;GO:1901362;GO:0051252;GO:0009058;GO:0006725;GO:0071704;GO:0051171;GO:0006139;GO:0060255;GO:0019438;GO:0044249;GO:…
IIc	FtWRKY53	FtPinG0007768300.01.T01	FtPinG0002710400.01.T01	459	50.5218	5.91	Ft8	WRKY,SMC_N	WRKY transcription factor 72	1.34e-69	0.470588	Nuclear	GO:0097659;GO:0008152;GO:0031323;GO:0044271;GO:0009889;GO:0018130;GO:0034654;GO:0010467;GO:0065007;GO:2000112;GO:0034641;GO:0016070;GO:0019222;GO:0010468;GO:0046483;GO:0050794;GO:0006807;GO:0034645;GO:0080090;GO:0044260;GO:0009987;GO:0006355;GO:0031326;GO:0010556;GO:0008150;GO:2001141;GO:0043170;GO:0006351;GO:0090304;GO:1901576;GO:0044238;GO:0050789;GO:0044237;GO:0009059;GO:0032774;GO:1903506;GO:…
IIe	FtWRKY54	FtPinG0006322300.01.T01	FtPinG0007768300.01.T01	320	34.8937	9.58	Ft6	WRKY, Plant_zn_clust	WRKY transcription factor 7	4.44e-89	0.470085	Nuclear	GO:0060255;GO:0019438;GO:0044249;GO:0071704;GO:0051171;GO:0006139;GO:0009058;GO:0006725;GO:1901362;GO:0051252;GO:0090304;GO:0044238;GO:1901576;GO:0043170;GO:0006351;GO:1903506;GO:1901360;GO:0019219;GO:0044237;GO:0009059;GO:0050789;GO:0032774;GO:0080090;GO:0044260;GO:0034645;GO:0010556;GO:2001141;GO:0008150;GO:0009987;GO:0006355;GO:0031326;GO:0009889;GO:0010467;GO:0034654;GO:0018130;GO:0097659;GO:…
IIa	FtWRKY55	FtPinG0008708000.01.T01	FtPinG0006322300.01.T01	361	40.2271	6.07	Ft1	WRKY	WRKY transcription factor 41	1.09e-44	0.33913	Nuclear	GO:0046483;GO:0010468;GO:0019222;GO:0006807;GO:0050794;GO:0065007;GO:0016070;GO:0034641;GO:2000112;GO:0009889;GO:0010467;GO:0034654;GO:0018130;GO:0008152;GO:0097659;GO:0044271;GO:0031323;GO:0010556;GO:2001141;GO:0008150;GO:0006355;GO:0009987;GO:0031326;GO:0080090;GO:0044260;GO:0034645;GO:1903506;GO:1901360;GO:0019219;GO:0009059;GO:0044237;GO:0050789;GO:0032774;GO:0090304;GO:0044238;GO:1901576;GO:…
III	FtWRKY56	FtPinG0000354800.01.T01	FtPinG0008708000.01.T01	313	35.1623	5.63	Ft6	WRKY	WRKY transcription factor 30	1.43e-33	0.378505	Nuclear	GO:0034641;GO:2000112;GO:0016070;GO:0065007;GO:0006807;GO:0050794;GO:0010468;GO:0019222;GO:0046483;GO:0031323;GO:0044271;GO:0097659;GO:0008152;GO:0018130;GO:0010467;GO:0034654;GO:0009889;GO:0031326;GO:0009987;GO:0006355;GO:0008150;GO:2001141;GO:0010556;GO:0034645;GO:0044260;GO:0080090;GO:0032774;GO:0050789;GO:0044237;GO:0009059;GO:1901360;GO:0019219;GO:1903506;GO:0006351;GO:0043170;GO:1901576;GO:…
I	FtWRKY57	FtPinG0003093800.01.T01	FtPinG0000354800.01.T01	369	39.5177	9.69	Ft5	WRKY	WRKY transcription factor 72	2.59e-65	0.465798	Nuclear	GO:0060255;GO:0019438;GO:0044249;GO:0016032;GO:0071704;GO:0051171;GO:0006139;GO:0009058;GO:0006725;GO:1901362;GO:0051252;GO:0090304;GO:0044238;GO:1901576;GO:0006351;GO:0043170;GO:0044419;GO:1903506;GO:0044764;GO:0019219;GO:1901360;GO:0044237;GO:0009059;GO:0050789;GO:0032774;GO:0080090;GO:0044260;GO:0034645;GO:0010556;GO:2001141;GO:0008150;GO:0009987;GO:0006355;GO:0031326;GO:0009889;GO:0034654;GO:…
IId	FtWRKY58	FtPinG0002810600.01.T01	FtPinG0003093800.01.T01	170	18.7548	5.97	Ft7	WRKY	WRKY transcription factor 1	6.39e-15	0.576271	Cytoplasmic	GO:1903506;GO:1901360;GO:0019219;GO:0044237;GO:0009059;GO:0050789;GO:0032774;GO:0090304;GO:0044238;GO:1901576;GO:0006351;GO:0043170;GO:0009058;GO:0006725;GO:1901362;GO:0051252;GO:0060255;GO:0019438;GO:0044249;GO:0071704;GO:0051171;GO:0006139;GO:0010468;GO:0019222;GO:0046483;GO:0006807;GO:0050794;GO:0065007;GO:0016070;GO:0034641;GO:2000112;GO:0009889;GO:0010467;GO:0034654;GO:0018130;GO:0097659;GO:…
IIa	FtWRKY59	FtPinG0002864000.01.T01	FtPinG0002810600.01.T01	190	21.0677	9.23	Ft4	WRKY	WRKY transcription factor 56	2.6e-56	0.769231	Nuclear	GO:2001141;GO:0009058;GO:0006725;GO:0008150;GO:0010556;GO:0031326;GO:1901362;GO:0009987;GO:0006355;GO:0051252;GO:0044260;GO:0019438;GO:0044249;GO:0006508;GO:0019538;GO:0080090;GO:0060255;GO:0034645;GO:0006139;GO:0071704;GO:0051171;GO:0050794;GO:0006807;GO:0019219;GO:1901360;GO:1903506;GO:0019222;GO:0010468;GO:0046483;GO:0032774;GO:0016070;GO:2000112;GO:0034641;GO:0044237;GO:0065007;GO:0009059;GO:…
I	FtWRKY60	FtPinG0009522600.01.T01	FtPinG0002864000.01.T01	145	15.9243	9.53	Ft1	WRKY, Plant_zn_clust	WRKY transcription factor 7	1.82e-41	0.613445	Nuclear	GO:0031326;GO:0006355;GO:0009987;GO:0008150;GO:2001141;GO:0010556;GO:0034645;GO:0044260;GO:0080090;GO:2000112;GO:0034641;GO:0016070;GO:0065007;GO:0050794;GO:0006807;GO:0046483;GO:0019222;GO:0010468;GO:0031323;GO:0044271;GO:0008152;GO:0097659;GO:0018130;GO:0034654;GO:0010467;GO:0009889;GO:0051252;GO:1901362;GO:0006725;GO:0009058;GO:0006139;GO:0051171;GO:0071704;GO:0044249;GO:0019438;GO:0060255;GO:…
IIb	FtWRKY61	FtPinG0004132200.01.T01	FtPinG0009522600.01.T01	473	52.3606	6.18	Ft8	WRKY	WRKY transcription factor 33	2.12e-118	0.460446	Nuclear	GO:0032774;GO:0016070;GO:2000112;GO:0034641;GO:0044237;GO:0009059;GO:0065007;GO:0050789;GO:0006807;GO:0050794;GO:0071103;GO:0019219;GO:1901360;GO:1903506;GO:0019222;GO:0010468;GO:0046483;GO:0006351;GO:0043170;GO:0044271;GO:0031323;GO:0016043;GO:0097659;GO:0008152;GO:0044238;GO:0034654;GO:0010467;GO:1901576;GO:0018130;GO:0071840;GO:0090304;GO:0009889;GO:0031326;GO:1901362;GO:0009987;GO:0051252;GO:…
IIe	FtWRKY62	FtPinG0004155300.01.T01	FtPinG0004132200.01.T01	380	41.9874	5.28	Ft1	WRKY	WRKY transcription factor 14	7e-76	0.400881	Nuclear	GO:0006351;GO:0043170;GO:1901576;GO:0044238;GO:0090304;GO:0032774;GO:0050789;GO:0044237;GO:0009059;GO:0019219;GO:1901360;GO:1903506;GO:0006139;GO:0071704;GO:0051171;GO:0044249;GO:0019438;GO:0060255;GO:0051252;GO:1901362;GO:0006725;GO:0009058;GO:0031323;GO:0044271;GO:0097659;GO:0008152;GO:0018130;GO:0034654;GO:0010467;GO:0009889;GO:2000112;GO:0034641;GO:0016070;GO:0065007;GO:0006807;GO:0050794;GO:…
III	FtWRKY63	FtPinG0001212400.01.T01	FtPinG0004155300.01.T01	323	35.7508	6.62	Ft7	WRKY	WRKY transcription factor 40	6.87e-72	0.428125	Nuclear	GO:0019438;GO:0044249;GO:0060255;GO:0006139;GO:0071704;GO:0051171;GO:0009058;GO:0006725;GO:1901362;GO:0051252;GO:0044238;GO:1901576;GO:0090304;GO:0006351;GO:0043170;GO:1901360;GO:0019219;GO:1903506;GO:0032774;GO:0044237;GO:0009059;GO:0050789;GO:0044260;GO:0080090;GO:0034645;GO:2001141;GO:0008150;GO:0010556;GO:0031326;GO:0009987;GO:0006355;GO:0010467;GO:0034654;GO:0018130;GO:0009889;GO:0044271;GO:…
I	FtWRKY64	FtPinG0007552800.01.T01	FtPinG0001212400.01.T01	148	16.1775	9.23	Ft8	WRKY	WRKY transcription factor 18	3.42e-51	0.542484	Nuclear	GO:0010556;GO:2001141;GO:0008150;GO:0009987;GO:0006355;GO:0031326;GO:0080090;GO:0044260;GO:0034645;GO:0019222;GO:0010468;GO:0046483;GO:0006807;GO:0050794;GO:0065007;GO:0016070;GO:2000112;GO:0034641;GO:0009889;GO:0034654;GO:0010467;GO:0018130;GO:0097659;GO:0008152;GO:0044271;GO:0031323;GO:0009058;GO:0006725;GO:1901362;GO:0051252;GO:0060255;GO:0019438;GO:0044249;GO:0071704;GO:0051171;GO:0006139;GO:…
IIe	FtWRKY65	FtPinG0004764100.01.T01	FtPinG0007552800.01.T01	640	69.3679	5.91	Ft2	WRKY	WRKY transcription factor 2	3.02e-100	0.437008	Nuclear	GO:0006807;GO:0050794;GO:0046483;GO:0019222;GO:0010468;GO:2000112;GO:0034641;GO:0016070;GO:0065007;GO:0018130;GO:0034654;GO:0010467;GO:0009889;GO:0031323;GO:0044271;GO:0008152;GO:0097659;GO:0008150;GO:2001141;GO:0010556;GO:0031326;GO:0006355;GO:0009987;GO:0044260;GO:0080090;GO:0034645;GO:0019219;GO:1901360;GO:1903506;GO:0032774;GO:0050789;GO:0009059;GO:0044237;GO:1901576;GO:0044238;GO:0090304;GO:…
IIb	FtWRKY66	FtPinG0002334500.01.T01	FtPinG0004764100.01.T01	360	37.8116	9.35	Ft3	WRKY	WRKY transcription factor 61	7.88e-50	0.449838	Nuclear	GO:0006139;GO:0051171;GO:0071704;GO:0019438;GO:0044249;GO:0060255;GO:1901362;GO:0051252;GO:0009058;GO:0006725;GO:0006351;GO:0043170;GO:0044238;GO:1901576;GO:0090304;GO:0032774;GO:0009059;GO:0044237;GO:0050789;GO:1901360;GO:0019219;GO:1903506;GO:0034645;GO:0044260;GO:0080090;GO:0031326;GO:0006355;GO:0009987;GO:2001141;GO:0008150;GO:0010556;GO:0044271;GO:0031323;GO:0008152;GO:0097659;GO:0010467;GO:…
IIc	FtWRKY67	FtPinG0002325700.01.T01	FtPinG0002334500.01.T01	231	26.4762	6.12	Ft6	WRKY	WRKY transcription factor 13	7e-58	0.791304	Nuclear	GO:0008152;GO:0097659;GO:0044271;GO:0031323;GO:0009889;GO:0034654;GO:0010467;GO:0018130;GO:0065007;GO:0016070;GO:2000112;GO:0034641;GO:0046483;GO:0019222;GO:0010468;GO:0050794;GO:0006807;GO:0034645;GO:0080090;GO:0044260;GO:0006355;GO:0009987;GO:0031326;GO:0010556;GO:2001141;GO:0008150;GO:0043170;GO:0006351;GO:0090304;GO:0044238;GO:1901576;GO:0009059;GO:0044237;GO:0050789;GO:0032774;GO:1903506;GO:…
I	FtWRKY68	FtPinG0002177700.01.T01	FtPinG0002325700.01.T01	271	29.9524	7.23	Ft8	WRKY	WRKY transcription factor 28	1.23e-62	0.476923	Nuclear	GO:0009058;GO:0006725;GO:1901362;GO:0051252;GO:0060255;GO:0019438;GO:0044249;GO:0071704;GO:0051171;GO:0006139;GO:1903506;GO:0019219;GO:1901360;GO:0044237;GO:0009059;GO:0050789;GO:0032774;GO:0090304;GO:0044238;GO:1901576;GO:0043170;GO:0006351;GO:0010556;GO:2001141;GO:0008150;GO:0009987;GO:0006355;GO:0031326;GO:0080090;GO:0044260;GO:0034645;GO:0019222;GO:0010468;GO:0046483;GO:0050794;GO:0006807;GO:…
IId	FtWRKY69	FtPinG0002142900.01.T01	FtPinG0002177700.01.T01	343	38.2602	4.97	Ft4	WRKY	WRKY transcription factor 41	2.92e-56	0.366762	Nuclear	GO:0090304;GO:1901576;GO:0044238;GO:0043170;GO:0006351;GO:1903506;GO:1901360;GO:0019219;GO:0050789;GO:0009059;GO:0044237;GO:0032774;GO:0060255;GO:0044249;GO:0019438;GO:0051171;GO:0071704;GO:0006139;GO:0006725;GO:0009058;GO:0051252;GO:1901362;GO:0009889;GO:0018130;GO:0010467;GO:0034654;GO:0008152;GO:0097659;GO:0031323;GO:0044271;GO:0046483;GO:0010468;GO:0019222;GO:0050794;GO:0006807;GO:0065007;GO:…
IIc	FtWRKY70	FtPinG0009255800.01.T01	FtPinG0002142900.01.T01	305	33.8166	8.63	Ft3	WRKY	WRKY transcription factor 57	1.11e-52	0.4375	Nuclear	GO:0034645;GO:0080090;GO:0044260;GO:0006355;GO:0009987;GO:0031326;GO:0010556;GO:2001141;GO:0008150;GO:0008152;GO:0097659;GO:0044271;GO:0031323;GO:0009889;GO:0034654;GO:0010467;GO:0018130;GO:0065007;GO:0016070;GO:2000112;GO:0034641;GO:0046483;GO:0019222;GO:0010468;GO:0050794;GO:0006807;GO:0051171;GO:0071704;GO:0006139;GO:0060255;GO:0019438;GO:0044249;GO:1901362;GO:0051252;GO:0009058;GO:0006725;GO:…
IIb	FtWRKY71	FtPinG0005364100.01.T01	FtPinG0009255800.01.T01	579	63.1069	5.16	Ft4	WRKY	WRKY transcription factor 72	7.48e-83	0.397516	Nuclear	GO:0006355;GO:0009987;GO:0031326;GO:0010556;GO:2001141;GO:0008150;GO:0034645;GO:0080090;GO:0044260;GO:0065007;GO:0016070;GO:0034641;GO:2000112;GO:0046483;GO:0010468;GO:0019222;GO:0006807;GO:0050794;GO:0008152;GO:0097659;GO:0044271;GO:0031323;GO:0009889;GO:0010467;GO:0034654;GO:0018130;GO:1901362;GO:0051252;GO:0009058;GO:0006725;GO:0051171;GO:0071704;GO:0006139;GO:0060255;GO:0019438;GO:0044249;GO:…
IIe	FtWRKY72	FtPinG0009798800.01.T01	FtPinG0005364100.01.T01	335	36.2762	9.82	Ft1	WRKY, Plant_zn_clust	WRKY transcription factor 7	5.55e-98	0.488827	Nuclear	GO:0065007;GO:0016070;GO:2000112;GO:0034641;GO:0019222;GO:0010468;GO:0046483;GO:0006807;GO:0050794;GO:0097659;GO:0008152;GO:0044271;GO:0051704;GO:0031323;GO:0009889;GO:0034654;GO:0010467;GO:0018130;GO:0009987;GO:0006355;GO:0031326;GO:0010556;GO:2001141;GO:0008150;GO:0034645;GO:0080090;GO:0044260;GO:0044237;GO:0009059;GO:0050789;GO:0032774;GO:1903506;GO:0019219;GO:1901360;GO:0006351;GO:0043170;GO:…
I	FtWRKY73	FtPinG0009186100.01.T01	FtPinG0009798800.01.T01	302	34.7648	6.22	Ft6	WRKY	WRKY transcription factor 27	1.06e-23	0.486486	Nuclear	GO:0009889;GO:0018130;GO:0010467;GO:0034654;GO:0097659;GO:0008152;GO:0031323;GO:0044271;GO:0010468;GO:0019222;GO:0046483;GO:0050794;GO:0006807;GO:0065007;GO:0034641;GO:2000112;GO:0016070;GO:0080090;GO:0044260;GO:0034645;GO:0010556;GO:0008150;GO:2001141;GO:0009987;GO:0006355;GO:0031326;GO:0090304;GO:1901576;GO:0044238;GO:0043170;GO:0006351;GO:1903506;GO:1901360;GO:0019219;GO:0050789;GO:0044237;GO:…
IIa	FtWRKY74	FtPinG0007226700.01.T01	FtPinG0009186100.01.T01	149	16.7809	5.13	Ft3	WRKY	WRKY transcription factor 29	2.76e-08	0.333333	Nuclear	GO:0060255;GO:0044249;GO:0019438;GO:0051171;GO:0071704;GO:0006139;GO:0006725;GO:0009058;GO:0051252;GO:1901362;GO:0090304;GO:1901576;GO:0044238;GO:0006351;GO:0043170;GO:1903506;GO:1901360;GO:0019219;GO:0050789;GO:0009059;GO:0044237;GO:0032774;GO:0080090;GO:0044260;GO:0034645;GO:0010556;GO:0008150;GO:2001141;GO:0006355;GO:0009987;GO:0031326;GO:0009889;GO:0018130;GO:0010467;GO:0034654;GO:0008152;GO:…
IIc	FtWRKY75	FtPinG0007227700.01.T01	FtPinG0007226700.01.T01	248	27.934	7.67	Ft8	WRKY	WRKY transcription factor 12	1.35e-67	0.748148	Nuclear	GO:1903506;GO:0010468;GO:0019222;GO:0046483;GO:0006807;GO:0050794;GO:1901360;GO:0019219;GO:0044237;GO:0009059;GO:0065007;GO:0050789;GO:0016070;GO:0032774;GO:0034641;GO:2000112;GO:0090304;GO:0009889;GO:0044238;GO:0010467;GO:0034654;GO:1901576;GO:0018130;GO:0097659;GO:0008152;GO:0006351;GO:0044271;GO:0043170;GO:0031323;GO:0010556;GO:0009058;GO:2001141;GO:0008150;GO:0006725;GO:1901362;GO:0009987;GO:…
IIc	FtWRKY76	FtPinG0001770900.01.T01	FtPinG0007227700.01.T01	306	34.0226	6.04	Ft7	WRKY	WRKY transcription factor 41	2.36e-42	0.347134	Nuclear	GO:0008150;GO:2001141;GO:0010556;GO:0031326;GO:0006355;GO:0009987;GO:0044260;GO:0080090;GO:0034645;GO:0006807;GO:0050794;GO:0046483;GO:0010468;GO:0019222;GO:0034641;GO:2000112;GO:0016070;GO:0065007;GO:0018130;GO:0010467;GO:0034654;GO:0009889;GO:0031323;GO:0044271;GO:0008152;GO:0097659;GO:0006725;GO:0009058;GO:0051252;GO:1901362;GO:0044249;GO:0019438;GO:0060255;GO:0006139;GO:0051171;GO:0071704;GO:…
	FtWRKY77		FtPinG0001770900.01.T01

## Sheet: WRKY gene sequences
Supplementary Table 1 List of the 76 FtWRKY genes identified in this study
Gene ID	Sequence Type	Sequences
FtPinG0004237400.01.T01	CDS	ATATTGCAGGTGGTGAAAGATGGATATCAATGGAGAAAATATGGCCAAAAGGTTACAAGAGATAACCCTTCTCCAAGGGCTTATTTTAAATGCTCCTTTGCTCCTCTCTGTCCCGTCAAAAAGAAGGTCCAAAAAAGTGTTGAAGATCCAACGGTTCTAGTTGTCACATACGAAGGAGAACACACTCACAAGAAGCCTTCTAGCCAAGCAACCAGTCTTACACCTTCAACTATGATCCCGCCTTTGTCGCCCATTGATCTTAGCCCTTCGAGTATTAATAGCACGGCTTCTGATCATCTGATCCGAAATCTTCTCGTCTCTGACCATACAAACGAAAATTCCGAAGAAGAAAATGTTGATGATCAAGATAGAAGCCCCGTACAACACTGGCTCGTAGAA…
	Protein	ILQVVKDGYQWRKYGQKVTRDNPSPRAYFKCSFAPLCPVKKKVQKSVEDPTVLVVTYEGEHTHKKPSSQATSLTPSTMIPPLSPIDLSPSSINSTASDHLIRNLLVSDHTNENSEEENVDDQDRSPVQHWLVEQMASSLIKDPKFASALATAISEKVLEQTFC
FtPinG0008708000.01.T01	CDS	ATGGATTATTCAGCTTGGTTAAGTACTTCATTGGATCTCAAGGTTGGAAGCAATCTCACCATCAATGGAAGTACTAGCACTCTTCGTCTTTTCGATGATTCGCCCGTCGGAATTCTCAAGAAGGAGCTCCAAAGTATCACTGCCACTACTTCTTCTGATCATGCTCAAGTTAGTAGTAGCAGCATAACCATCAAAGATGAATTTCCTAAGGTGGCTGCAGCAGAAGCTAGTGCTTTGTTAGCAGAAGAATTGAGTAGAGTAAGTGCAGAAAACAAGAAGTTGACTGAGATGTTGGTTGTGGTTTGTGAGAAGTATAATTCATTGAGAACTCAAATGGTTGATTTCATGGGCAAGAAAAATGATCAAAACAACAACAACAACGAAAACAATTGCGTCGAG…
	Protein	MDYSAWLSTSLDLKVGSNLTINGSTSTLRLFDDSPVGILKKELQSITATTSSDHAQVSSSSITIKDEFPKVAAAEASALLAEELSRVSAENKKLTEMLVVVCEKYNSLRTQMVDFMGKKNDQNNNNNENNCVEINHSTASSGSKKRKSADSTTNNSSSDEEHDSCAKKSKGEPISGVTKISKAYVKTEAADTSLIVKDGYQWRKYGQKVTRDNPSPRAYFKCSFAPSCPVKKKVQRSLEDQSILVATYEGEHNHPPLSQPQDMSAASTPATGANRRVVSNNTLNSSSSSSGQGTIILDLTKPRSVLVPHPTTIVDTSSKVPTTSNQQQRINNSSPEFQKFLVEQMASSLTKDPTFTAALAAAISGRFMQPQQHNSKDKW
FtPinG0004132200.01.T01	CDS	ATGGAGTGTCATGAAGGAGGATACAAAGCCAAACGTGTAGTACTCAAGGAGATGGACTTTTTCGGAACCTCCAATGCCGCCAAGGCTGGTGGTGGTGATAAGAGACCGGAAGTTGTAGAACTTGATGATGATATCAAACTTGGTATTGATACACGTTTAGATCTCGGAATAACTCAAACCGATATTGACGAAGACAAGGCTTCTGCCGGTCATGGTGAAGTTTTATCCCACACAGAAGACAAACAAACTGCTGAGAAGCTTGCTATTCTAAGGGCTGAGGTTGAACAAAAGAATGTAGAAAACCAAAATTTGAAGAAGATTCTTGGTCAAGTGACTAACAACTACACATCTCTACGTATGCATCTTTCGACTTTCCTCCAACAACAACAACAACAAAAC…
	Protein	MECHEGGYKAKRVVLKEMDFFGTSNAAKAGGGDKRPEVVELDDDIKLGIDTRLDLGITQTDIDEDKASAGHGEVLSHTEDKQTAEKLAILRAEVEQKNVENQNLKKILGQVTNNYTSLRMHLSTFLQQQQQQNKVYQNPIKECNRDKMANGQDGGNESTPIQMIDCSSGSRDNQDNSKERLKRKINGLGECDEDDRGKSSSMNRQEDCTKQGQERTKIPRLNGGPEEGESQHEMTMRRARVSVRARSEASMISDGCQWRKYGQKMAKGNPCPRAYYRCTMGTSCPVRKQVQRCAEDKSILITTYEGQHNHPLPAAAMAMASTTSAAASMLVAGTMPSGDGIMSYPTNLLSRTILPGLPTLATISASAPFPTITLDLTNPPPTPSGGPPPPNNTNNSPFA…
FtPinG0009798800.01.T01	CDS	ATGGATCAGAGGTTTCGACGGAGCACATTTGCCGCCAGTCGTGATCACGATGAGCCACAGAGCTCATCGGAGACTGGCGGGGATGACTCTCCTCACTCCGGAGATGACACCCGTGCCACAGCCACCACCGCAACCACCACAGCTCTCTCTCCTAAGAAAGGGAGGCGGAGCATACAGAAAAGGGTGGTGACTCTTCCGTTTAGTGACGTGGATGGATCTCGAAGCGGGAAAGGAGAAGCATATCCACCGTCCGATTCGTGGGCTTGGAGGAAGTATGGCCAGAAGCCTATCAAAGGATCTCCTTATCCAAGGGGATATTATCGATGCAGCAGCTCCAAAGGTTGTCCCGCTAGAAAACAAGTCGAGAGGAGCCGTGTGGACCCCACTACACTCATCATC…
	Protein	MDQRFRRSTFAASRDHDEPQSSSETGGDDSPHSGDDTRATATTATTTALSPKKGRRSIQKRVVTLPFSDVDGSRSGKGEAYPPSDSWAWRKYGQKPIKGSPYPRGYYRCSSSKGCPARKQVERSRVDPTTLIITYASEHNHPAPATKHHHHHHNHHQSSAAAPATPISPATPTPPETTPSDDVDTDATTCTEEFPSEERKELLACAAELGLGGAVIMDFSWLSDVVKEAPSFVGPRWDDDDADVSGLSMTSTTTVNMREEDVSLFADLDELPECSAVFRTRRGTSTCTLRTAAAASLCGTTG
FtPinG0007732600.01.T01	CDS	ATGGGTCCAGTTTCCCCTCACATCTTTTCTCTTCAAAGACCAAATCCTTCTAATCCGTGGGAGTTGAGATCTAGCGGAAGTGAGTGTTTGGTAAGCAAGAGATCATTCAACGGAGACAGTGAACCAAGTTTAGAGGATCATGATAGTGTTAATGCTACCAATGATAACATGATTGATAAAAAGAGTCTATTAGGGGTTTCGGCATTACGAATGAAGAAGATGAAGGGAAGAAGAAAGGTAAGGGAACCAAGGTTCTGTTTCAAGACCCTTAGTGATGTCGATGTACTTGACGATGGCTACAAATGGAGGAAGTATGGCCAGAAAGTTGTCAAGAACACCCAGCATCCTAGAAGCTACTACAGGTGCACGCAAGACAAGTGTAGGGTGAAGAAGAGGGTG…
	Protein	MGPVSPHIFSLQRPNPSNPWELRSSGSECLVSKRSFNGDSEPSLEDHDSVNATNDNMIDKKSLLGVSALRMKKMKGRRKVREPRFCFKTLSDVDVLDDGYKWRKYGQKVVKNTQHPRSYYRCTQDKCRVKKRVERLAEDPRMVITTYEGRHVHSPSHDNPDEDSNNGLPTLNNFFW
FtPinG0006388000.01.T01	CDS	ATGCCGAGCTCTTCAGTTTCCACTATGGGAAGTCCTAAGAGCGAGGATCTGCATGTTGGGTTCAACAACTCTTATCAAGATGACAAACAAAAGTCGAAAAAGAGGAAAGCCGACTCTACGTGGACAGAAAAATTGACAGTGAATTCGGGAACTAGATCTGATGCTCCCCCAGCTGATGGCTATAACTGGAGAAAATATGGCCAGAAAGATATCCTCGGAACCAAGCATCCTAGGAGCTACTATAGATGCACGTACCGAAGTGTCCATAACTGTTGGGCCACAAAGCAGATTCAAAAATCAGACGAGGACCCCACGATGTTCCACATCACATACAAAGGAAAGCACACGTGTACTGTGGACAGTCGGTCCAAGTCAGCACCCACGTCACCAGGAATACAA…
	Protein	MPSSSVSTMGSPKSEDLHVGFNNSYQDDKQKSKKRKADSTWTEKLTVNSGTRSDAPPADGYNWRKYGQKDILGTKHPRSYYRCTYRSVHNCWATKQIQKSDEDPTMFHITYKGKHTCTVDSRSKSAPTSPGIQQAKPNDLLNTEYQQQQQDSAMSLSLENALIANTQNTDIFPFSWTEFGLLRGESSHFLPSTINNTDNFYRSFSPSLTPSTSGSNYFSMSPCTTDTFASLHHQEHNFEPDIAEMLSVTISGTESATIEQDFSADTWFVNPNLPANNQ
FtPinG0005008400.01.T01	CDS	ATGGAGTCTTGGAATCTAAGTGGTAACCACCAGATGATGATACCGAACACATCGTTTACTACTACTACTACTACAACCACTATTGGCTCTTTTGAGTCATCTGGAAGTGATCCCTATGATCCTTCTGAATTTGAGGTCTCGGATTTCTTCACGTTTAATACTGCTACTGATGATCTTTCCACCATGGTTTCTGGGTATTTACAGAATGGTGGATTTGCGACAAATGAACCGGTTCACATTACTAGTAGTGGTCATAATCAAGGAGAGAGTAGTAGAAGAGCTAACAGGGGCAATGAAAGGGAAGCGAAAGTGCGGATTGCATTCAAAACCGAATCAGAGATTGAGTCACTCGATGATGGCTTCAAATGGAGGAAGTATGGGAAAAAGATGGTAAAAAAC…
	Protein	MESWNLSGNHQMMIPNTSFTTTTTTTTIGSFESSGSDPYDPSEFEVSDFFTFNTATDDLSTMVSGYLQNGGFATNEPVHITSSGHNQGESSRRANRGNEREAKVRIAFKTESEIESLDDGFKWRKYGKKMVKNSPNPRNYYRCSINGCPVKKRVERDRDDPRYVITTYEAVHNHQSSI
FtPinG0004460400.01.T01	CDS	ATGGGACAAGTAGCAGAAGAGAACAAGAGACTCAAATCCAACCTAGACCGAATGATGAAGGACTACCAAACCCTCCAAATGCGCTTTTACCAAATCACTCAACAAGGATCCAAAGCTCCCGTAGTAGACGTCGACGTCACTCCACAATCGGAGGATGATACGCATGAGCTCTCGCTAAGTCTCGGGAGAAACTCAAGCATCGATTCAAAGAACAAAGATGAGACCAACAAGAACAACTTTCCTGAGTTAAGCCCACAAGAAACCCTAGTTAAACAGAATAGTGGATTGTCTCTTGCCTTAGATTACAAAAATCAAGGTGGGTCCAAAACCTCAGTGGAACCAACCGGAACGAAGCAAAACTCGAGCACGGAAAATAGTTTCGATGAGCCCAAGGATGAT…
	Protein	MGQVAEENKRLKSNLDRMMKDYQTLQMRFYQITQQGSKAPVVDVDVTPQSEDDTHELSLSLGRNSSIDSKNKDETNKNNFPELSPQETLVKQNSGLSLALDYKNQGGSKTSVEPTGTKQNSSTENSFDEPKDDVAETWPPSKALKTVRSGGGSRDDEVVQQPPVKKARVSVRARCDTPTMNDGCQWRKYGQKIAKGNPCPRAYYRCTVAPNCPVRKQVQRCADDMSILITTYEGTHNHPLPISATAMASTTSAAAYMLVSGSSTSNSGIGSNSNASNTNTTTNFPSNYVSNFPGLNFNLSDTSRSRPFFLPNSSFLPSPSQPTITLDLTTSSSSSSSASQFSKLASTNYTPRPYPNTTTNLTFNSLELSNPNPNSNPLPFSWPPNGHQTYNKDGFYQTL…
FtPinG0004319300.01.T01	CDS	ATGCAGAGGATGTGTTTATATAATCAACAACAGCAACAAATGAAGTATCATGCTGAGATGTATAAATCTAGGAGCAGAATGTCTTCAAATAGGTCTTTTATGTCAGGTTTGAGCATGGATGTTAGTGTGGCGAATTCGTTTCAGGTGACCGGACTTCCTAAACCGTCCGATCAGACTTCTGAGCAACTCATGAGAAGGAGGTGCACCTTCAAAGGTGAAGATGGGAGTTTGAAGTGTGTTAGTAATGGGAAATGCCATTGTTCAAAGAGAAGGAAAGTGAGGATGAAGAGATCAATTAAAGTGCCTGCTATCAGTAACAAAATTGCAGACATCCCAGCTGATGAATATTCATGGAGGAAGTACGGACAAAAGCCAATTAAAGGCTCTCCATATCCTAGG…
	Protein	MQRMCLYNQQQQQMKYHAEMYKSRSRMSSNRSFMSGLSMDVSVANSFQVTGLPKPSDQTSEQLMRRRCTFKGEDGSLKCVSNGKCHCSKRRKVRMKRSIKVPAISNKIADIPADEYSWRKYGQKPIKGSPYPRGYYKCSSIRGCPARKHVERCVDEPAMLVVTYEGDHNHSRLTS
FtPinG0000497200.01.T01	CDS	ATGGAGAATTATCAGTTTATATTCCCAAACCCGTCGTCCTCTTCGTCGCCGGCAGCTCACAGTGAGCACCGTCAGTATTTCCCCTTCTCCTTAAACATGGATCACCACCAAAGCAGTACTTCCAATCAAGATTATTCGAGTCGTAAAGGAAGTGATGATACGAATGAAGAAGAGACAACGACCAATCCTAAATTGGGGATATCGAACAAGGGAGATCATAAGAAGGCGAAGAAACATCGGTATGCTTTTCAGACAAGAAGCCAAGTTGATATTCTTGATGATGGATATCGATGGAGGAAGTACGGTCAAAAGGCCGTCAAGAATAACAACTTCCCACGAAGCTACTATCGGTGCACGCACCAAGGTTGCAGTGTGAAGAAGCAAGTTCAAAGACTTTCA…
	Protein	MENYQFIFPNPSSSSSPAAHSEHRQYFPFSLNMDHHQSSTSNQDYSSRKGSDDTNEEETTTNPKLGISNKGDHKKAKKHRYAFQTRSQVDILDDGYRWRKYGQKAVKNNNFPRSYYRCTHQGCSVKKQVQRLSKDEGVVVTTYEGIHSHPIEKSTDNFEHILTQMQIFTAY
FtPinG0006201300.01.T01	CDS	ATGGAAAGGGGATGGGGATTGGCCATTGAATCTGGTAAGAGTAATTTTTTAGTTGAACATCATCGCCGGCGTACTCAAGGTCCTCCGATCGTTGAATCTCTGGTGAACAACACCAACGATCAGATCAAAAGTAGGATGTTTGATTTTTCCGGCGTGAATTCGAATGAGTTAAGGAGGTTGAAGGCGGAGCAGGAGGAGGACGTCGGTGACCGCTTGCCGGTTGATGAGGTTGACTTCTTTTCCGGTCACCGGGGAAACGATGAACGCGTTAAGGAGGAGAATTCGAATTCTCAAACTGGTCAAACTTCTGATATGGGTGTAAATACTGGTTTGCACCTCCGGACGATTAACACCGGAAGCGATCAATCAACAGTTGAAGATGGAGTTTCATTTGTGACA…
	Protein	MERGWGLAIESGKSNFLVEHHRRRTQGPPIVESLVNNTNDQIKSRMFDFSGVNSNELRRLKAEQEEDVGDRLPVDEVDFFSGHRGNDERVKEENSNSQTGQTSDMGVNTGLHLRTINTGSDQSTVEDGVSFVTVPKKTKAANELAMLQGELERMNAENQRLKGSLAQVSQNYNSLQMHLIAFMQHKQNPSTNLHHDTQIKPKPDNNRNSNVNGVDNHPARLMPRQFLDLVSSTTSVAVDDESSERTSSEDQATDNKKREESPGSEEQGWVASKVPKLTGLSNPSGINHPTATTTAAEATMRKARVSVRARSEAPMISDGCQWRKYGQKMAKGNPCPRAYYRCTMANGCPVRKQVQRCAEDRSILITTYEGNHNHPLPPAAMAMASTTTAAASMLLSGSM…
FtPinG0003001300.01.T01	CDS	ATGCAATCAATCATGGCGGTTGAATTGATGGTTGGGAGTTACCGGAGCAAAACATTCGCAGCTGAAATGGAAGAAACCGCCGTCCGAGAAGCCACAACCGCCGGCCTTCAAAGCGTCGAGAAACTTATTCATCTTCTCTCTCAAACACAACCTCAATCTTCTTCTTCAACAAATTCCGATTACAAATTCGTCGCTGATGTAGCGGTTAACAAATTCAAGAAGGTGATATCCTTACTTGACCGGACTCGAACCGGTCATGCACGGTTTAGACGAGGACCGGTTTCTACTTCATCGTCTTCTTCACCACCACCTCAACCTCCTCCTCCGATGATGATGACCAAACCTCATCCCTCTGCTTTCACTAGAGTTCAATCTGGATCACAGATCTCGCAACGGTTA…
	Protein	MQSIMAVELMVGSYRSKTFAAEMEETAVREATTAGLQSVEKLIHLLSQTQPQSSSSTNSDYKFVADVAVNKFKKVISLLDRTRTGHARFRRGPVSTSSSSSPPPQPPPPMMMTKPHPSAFTRVQSGSQISQRLLPPLPVNVNKIVDRKEATTTINFTSSPANSFMSSVTGDTDSVTPSMSSGFQITNLSNISSAGKPPLSNSLKRKCNSVDDKCVLAGVSSSGRCHCSKRRKSRVKRVVRVPAISLKMADIPPDDYSWRKYGQKPIKGSPHPRGYYKCSSVRGCPARKHVERALDDPSMLIVTYEDEHSHSRSTTDATTSAIVLESS
FtPinG0004829100.01.T01	CDS	ATGGACTATTCCACTTCTCGCTCTCCTTCTCCCTCTTCTCCGGCTATAATCCACCGCCGTAGCCTCGTTCTCGAGCTACAGAAAGGCCATCACGCTGCTCAACAGTATCGCCGACGCCTCATTCGCTCCCAGCCTTCTTCACCGGCTGATGATCCGACGGTCTCCAACTTCGATCTCCTCGACATGATTTTCAAATCGTTTGATAACAGTCTGTCGATTGTTAGGAGCTGTGACGCGTCGCTTGTTTCTCGATCTTCTGATGACTGTAAAATTGAGGATCCAGGTTGCGATGGTGGTGGTGAGAGCTCGCGGATCAAGGACCGGAGAGGCTGTTACAAACGGAGAAAGAGAGGGCAGGCCTGGACAACCGAGGGCGAGGGTCCTTCTGAGGATGGTCAC…
	Protein	MDYSTSRSPSPSSPAIIHRRSLVLELQKGHHAAQQYRRRLIRSQPSSPADDPTVSNFDLLDMIFKSFDNSLSIVRSCDASLVSRSSDDCKIEDPGCDGGGESSRIKDRRGCYKRRKRGQAWTTEGEGPSEDGHAWRKYGQKMILNSAYPRNYYRCTHKTDQGCQAIKQVQRTSEQPSRYKTTYNGHHTCKNPLKTPQIILPSSSPDQSDSSILLSFERFSNNNHPFFPPSNNFNSAIKQEQPPTTSAVNQAMMTTMMNQTSPSEFNYLSSSDPTTFSSGPHTGLPTTSGSDYGGDVISAGTYSCPESPHSLPVLDDIFLGQDHLQYIAFDCDTDN
FtPinG0005548400.01.T01	CDS	ATGGATCATTCAACATGGTTGAGCTCATCCTTAGATCTCAAGGTTGGAAAAACCATGAGCAGCAATAGCACCCTTCAGCTTTTCGAGGACTCTCCTGTTCGAGAGCTCGAGAACGAGATCAAAGACGAGCCTCATCAGGAGACAACAGCTGCTTTGCTAGAAGAGGAGTTGAAGAGGCTAAGTGCAGACAACAAGAGGCTTACAGAGATGTTAGTGTTTGTTTGTGACAAGTACAATACTTTAAGAACCCAGATGGTTGATTACAACATTATCCCTTCGAATGTTCTCAACAACAACGAAAACAATTTTATCGAGTTTCATAACAGCTCGGGAAGTTGTGCATCGAAGAAGAGGAAATCGGGAGATAGCAGCTCGAGTGATGAGGAAGAAGATTTGTGT…
	Protein	MDHSTWLSSSLDLKVGKTMSSNSTLQLFEDSPVRELENEIKDEPHQETTAALLEEELKRLSADNKRLTEMLVFVCDKYNTLRTQMVDYNIIPSNVLNNNENNFIEFHNSSGSCASKKRKSGDSSSSDEEEDLCAKKSKGEAIIGVTKISKAYAMTEASNTSLIVKDEYQWRKYGQKVTRDNPCPRAYFRCSFAPRCPVKKKVQRSLEDQSILVATYEGEHNHPPTSQSQPSPANRIVVSSSSLGPSTVTLDLSKPKPIPNATTSQNIDSSCSQQRIKNYPPEFQKFLAEQMASSLTKDPSFTASLAAAISGRFMQKNLEDK
FtPinG0000403800.01.T01	CDS	ATGGAGCTTTTGAGATACCAGAGGTTTGAGAGCTTGTCATCTGTACTAGATGGTATGAGTGAGATGATAACTCCAAGTGGTCATGAGGTTCAAGAAGCTTCTGAGGTCTCAAATCCATTTCCTGCAACTCCTAATTCCTCTTCAATCTCATCTGCTTCAAATGATGAGCAACCTGCTCTTGATCATAATCTTGTCAAGGAGGAAGAACAAGAAGATCAAAACCCACAAAACAAAACTTGCACAAAACAGCCGCTGAAACCCATGAAAACAAATCAGAAGAGGAAGAAGAAGGAGAGAGAGCCAAGGATTGCTTTCATGACAAAGAGCGAAGTTGATCACCTTGAAGATGGCTATAGATGGAGAAAGTACGGCCAAAAAGCTGTCAAGAACAGCCCTTTC…
	Protein	MELLRYQRFESLSSVLDGMSEMITPSGHEVQEASEVSNPFPATPNSSSISSASNDEQPALDHNLVKEEEQEDQNPQNKTCTKQPLKPMKTNQKRKKKEREPRIAFMTKSEVDHLEDGYRWRKYGQKAVKNSPFPRSYYRCTSTACNVKKRVERCLHDPSIVITTYEGQHTHPSPIMGRGIGFPTGFLPNSGFSSILSNTPTANPCTLPAQMGSTYLIQDNYVNGCFPTLSFNQISSNSTTNLQSSLVQGTRVRNPSGDGVGLPRDDGLLEDVVPSHVYDRSMINEG
FtPinG0005111700.01.T01	CDS	ATGTCTGATTCCAGAGAACGAATTTCGGCGCCGAACCGACCCAGCATAACGATTCCACCGCTACGTCCACCGTCAGAAGCTCTAGCGCCGACCACCACAAGTCCTAGTCCGATGACGATCGTCTCCAATTTCTTTGCCGACAACTTTCCCGACATGGGCTCTGATTTTCGCGGTTCGTTCTCTCAGCTCCTTGCTGGAGCTATGGTTTCTCCGTCAACGGTTAGCTTTTTTGGAGACGGCTCTTCTTTGCCTGATCGTCCGGTTGACGGAAACTCCGGTTTGGGGTTTAAGCAGAATAGACCGGCTGAGTTGACGGTCCCGGTTCAAGCTCCGATTTCTCCGTTGTTTCCGATCTCTCCTGGGTTTAGTCCTTCCGCTTTCTTCAATTCTCCCACCGCT…
	Protein	MSDSRERISAPNRPSITIPPLRPPSEALAPTTTSPSPMTIVSNFFADNFPDMGSDFRGSFSQLLAGAMVSPSTVSFFGDGSSLPDRPVDGNSGLGFKQNRPAELTVPVQAPISPLFPISPGFSPSAFFNSPTAGFFSSALSPFGMSHQQALAQVTAQAALSQSVFPSTSSAPPSMDQVMMSQQPFSFSSPAQDPSISLSITEPTKQRASKPPQDSRVDTRVNIPLPAPVDKPADDGYNWRKYGQKQVKGSEYPRSYYRCTNSICPVKKKVERSKNGHITEIIYKGQHNHDPPQPSRRGRDNSNIDNDSKWSNGAEDSAQATSIQLHGPSDSEESGDGYQGFDENDDEEEPNAKRRNTGAGTSEAGLSQKTVTEPKIIVQTRSQVDLLDDGYRWRKYGQK…
FtPinG0004671500.01.T01	CDS	ATGAACAGAGCTCGGAGCTTCGACGACCGGCTGGCGGAGCCTTCAGCTGATCAGGATGCTTTGTCTGATTCGGTTGATTACGCTCCAGAACCGAGCGCTGAAGATGAGGTCGGAAGAGGCGGATCCATCGGCGGTGGGAAGCTTCGGATCTCGAATTCGCCGTGTATGTCAATTCCGCCAGATCCCAGTCCGTCGTCATTTCTCGAGCCTCCTGTTCTCATCTCTAACATTAAGGTAGAGCCATCCCCCACAACTGGCTCTTTCTGCGAACCTCAGATAATGCATGGATATGGAGGATCCAAAATGTTTTCAATTATAAATACCTCTGGTGCCATGAGTAGGAGTAAATCAAACTGCTTAGAGTTCGCACCCACTTCAGGATCAAATTCTGCTGCAATC…
	Protein	MNRARSFDDRLAEPSADQDALSDSVDYAPEPSAEDEVGRGGSIGGGKLRISNSPCMSIPPDPSPSSFLEPPVLISNIKVEPSPTTGSFCEPQIMHGYGGSKMFSIINTSGAMSRSKSNCLEFAPTSGSNSAAIFSHLGPLACADISNQQSDIDMQVEGQSLPHYLASSKQTDSDESNQKLISDFEVQAPHTDQSSIASTMNETMSDDGYTWRKYGQKLVKGCEYPRSYYKCAYPNCEVKKLFERAPDGQIPEIIYKGSHDHPKPQPNRRLTDGSVTSIQENRSEKFSSLTEKNSTISGQMTPNKDPTVTAELSPTIGIIDDVEAGTSQLNRIPDDADDTFVKRRKMEMGGLDINPIFKPIREPRVVVQTLSEVDVLDDGYRWRKYGQKVVRGNPNPRSY…
FtPinG0007313500.01.T01	CDS	ATGGAGAAGGTGGAAATGGCGAACAAAGTGGCTGTGGAGAGTGGGCATAGATTACTCAGCCTTCTGGAAAATGAAGTTGTTTCAAGAAATCTAACCGCAGAAACTAATGAATCTGTTTATAAGTTTAAGAAAGTGGTTTCTCTTCTTGACAGCAATAGGTTTGCTGTTGCTAAAGCTAGAAGGATGAAGACATTAACCATACCCAATTTGCCTAAACGCCTCTTCCTAGAAACCTACCCAAATCCAAATCCAAATCCAAATCCTTTAACCAACAACAAGAGGCCTCTCCAATTACTTCCAGCTACTTATTACCCCCAAAACCAGTTCATCGATACCCGCTTGTCGATTAGGCCTCCTTGCGATAGAACTGCAGAGCCAAATGAGTTGCAGAGGATGCAT…
	Protein	MEKVEMANKVAVESGHRLLSLLENEVVSRNLTAETNESVYKFKKVVSLLDSNRFAVAKARRMKTLTIPNLPKRLFLETYPNPNPNPNPLTNNKRPLQLLPATYYPQNQFIDTRLSIRPPCDRTAEPNELQRMHFHHQQEKMKYDADMCSWGEGPSTVSSIVSSLSLEGSVNNQSGQNESGSAGKCHCSKKRKVRVKRTIKVPAISNKMADIPTDEFAWRKYGQKPIKGSPHPRAYYKCSTVRGCPARKHVERCAEEPSMMLVSYEGEHVHPRFITIEALPIMGHQPGINEQFKH
FtPinG0003722700.01.T01	CDS	ATGGCGATCCAGCTTTCCGGCAGGTATTTGGCAGAAGACGATGAGAGGATGGCAATACAGGAAGCCGCGACTTCCGGTCTTAAATCCATGGAGCATCTCATCCGTCTTCTCTCCGAGCAAGATTCCAACAACCGCCACAATCACCACCACCAGAAGCAGCAACAGATGGATTGCAAAGATCTGACCGACGCTACTGTCGGAAGCTTTAAACGACTCATCTCTGTTCTCAACCGCACCGGCCACGCTCGCTTTCGCCGCGGACCTACTTCCGATTTCTCTTCTTCCTCTTCTCCGTCTCTTCCTCCTCCTCCACCTCCGGTTAAGAGCTTCGTTCAACCTCAGCCTCAGGCGTTAACGCTTGATTTCAGCAAGCCGAACGATCCGCTGCCGGTACCTTCG…
	Protein	MAIQLSGRYLAEDDERMAIQEAATSGLKSMEHLIRLLSEQDSNNRHNHHHQKQQQMDCKDLTDATVGSFKRLISVLNRTGHARFRRGPTSDFSSSSSPSLPPPPPPVKSFVQPQPQALTLDFSKPNDPLPVPSKLVDLSCASQSFSLSSANSSFMSSITGEGSVSNGKQFGTSSSLFLQPAAKPPLSSSSSFSRRCHDSDDFSGKVSGSSSSRCHCSRKRKLRVKKTIRVPAVSSKISDIPVDEYSWRKYGQKPIKGSPYPRGYYKCSTVRGCPARKHVERASDDPTMLIVTYEGEHRHSHQPASQDKISPPSLSLGIGFPVNATLGALN
FtPinG0001732900.01.T01	CDS	ATGTCATCCACTCGGTCCTTTATATCTTCGCTGAGTTTGGATGGAAGTATGGCTAACTTGGATGGTAACGCGTTTAGCTTAATGCGAGCAACACAGTCATCTGGCCAGATTTCAAATCAGCATAAAAAGAGGTGCAGAGGGCAAGATGGGACAATGAGATGCGCGAGCAGTGGAAGATGTCATTGCTCTAAGAAGAGGAAACACAGGATTAAGAGATCAATTAAAGTTCCTGCCATAAGTAACAAGGTTGCGGATATTCCACCAGACGAGTATTCATGGAGAAAGTATGGACAGAAGCCAATTAAAGGTTCACCACACCCAAGGGGTTACTATAAGTGTAGCAGTGTGAGAGGCTGCCCTGCAAGAAAGCATGTGGAAAGATGCTTAGAAGACCCTTCA…
	Protein	MSSTRSFISSLSLDGSMANLDGNAFSLMRATQSSGQISNQHKKRCRGQDGTMRCASSGRCHCSKKRKHRIKRSIKVPAISNKVADIPPDEYSWRKYGQKPIKGSPHPRGYYKCSSVRGCPARKHVERCLEDPSMLIVTYEGEHNHPRVPSQSANV
FtPinG0005364100.01.T01	CDS	ATGGAAAGAGGATGGGGATTGACTCTTGAATCTGATCGAAGTAACAACGCAACTTTACCAATTGATCCTCGTCAATCCATCTTGTTCAAGAGAAACCTACTTTCTAACGCTATGCAGATCGTTCCCGTTAGTCTGAATCGGAGAGATCAGGAGGAGGCCGGAGATGAACATCGAACCACCGTTGAGGTTGACTTCTTCTCTGATCGCCGGAGAAGGGATGATCGTGTGAATTACGACGATCAGAGTTCTCAAGCTAAGCCTGATCTAAATTTAAATACCGGTCTGCACCTTCTCACCACGAACACAGGGAGCGATGAGTCAACGATGGATGATGGCGTTTCATCTGACGCGGAAGATAGAAAATCCAAGACTGAGCTAGCGAAGCTGCAAGTGGAATTA…
	Protein	MERGWGLTLESDRSNNATLPIDPRQSILFKRNLLSNAMQIVPVSLNRRDQEEAGDEHRTTVEVDFFSDRRRRDDRVNYDDQSSQAKPDLNLNTGLHLLTTNTGSDESTMDDGVSSDAEDRKSKTELAKLQVELEQMNIENERLKGMLAQVSQNYTALQMHVVAIMQQHQNQIQQEKQNQNLQVINSQEMVQAKPEPSENKPHQFMEPGPYEPSDQTSLEERTVDDPLGKRDESPDSDNQGWVANKVPKLSPPIDNQQTTASTEATMRKARVSVRARSEAPMISDGCQWRKYGQKMAKGNPCPRAYYRCTMAVGCPVRKQVQRCAEDRSILITTYEGTHNHPLPPAAMAMASTTSAAASMLLSGSMPSSDGATLMNPSFLARTILPCSSNMATISASAPF…
FtPinG0005089800.01.T01	CDS	ATGTTTAAGCCCTTTGTGGCTCAAGTGCACGAGTCTTCTGCCGAGACGACTTCGCCTTGTTCGTCTTCCGTTGTCGTGTTTGATCATGATGATGATGTCGAGAAGCCGAAGGAGGAGATGAAGGTGCCCGTTGTGGAAGATCGAATAGAAGCAAGATGTTCTTCTAGAAGAAGGAAAAGTAAGCAGAAAATAATGAGGATGGTACATAAGGGTGTAGGAGAAGATGTTGTTGTGATGGATAAGTGGAATTGGAGAAAATATGGCCAGAAAGCTATCAAAGATTCTCCATACCCAAGGAGCTACTACAGATGCAGCAGCTCAGGAGGGTGTCACGCAAAGAAGCACGTAGAGCAAAGCAAAGACGACCCACAAACCTTCATCGTTACCTACATCGCCGAT…
	Protein	MFKPFVAQVHESSAETTSPCSSSVVVFDHDDDVEKPKEEMKVPVVEDRIEARCSSRRRKSKQKIMRMVHKGVGEDVVVMDKWNWRKYGQKAIKDSPYPRSYYRCSSSGGCHAKKHVEQSKDDPQTFIVTYIADHTHSPPTRRHAQAGRKITKFSSSTTRMKINNNTNKNTPPCSDSMTWTISDPSIVEDENHRIVLGERVSEDSFGSSFDHDWSIWEFDPFFATTSVN
FtPinG0001577500.01.T01	CDS	ATGAATTTCACCTTCACATCCGACCACCTCAGCTCCGGCGACAAGCAGCCTTCCTCTGGCGTCGTCAGCGCCTCCAGGGTACTACTCTCCGGCGTCCCTAAATTTAAGTCCACACCACCCCCTTCTCTTCCGATCTCATCTCCTTCTTCTTCCTTCTTTTCTATCCCTCCTGGCCTTAGCCCTGCCGAGCTCCTCGATTCCCCCGTTCTCCTTAATTCCTCATCCATATTGCCGTCTCCTACAACTGGGGCTCTTATAGGACAGAGCTTCAACTGGAAGATCAACAGTAATCCCACAACCGCAGCCCCAAATTACAACACTAGGGAAGACAATTTCTACCCCGACTTCACCTTTCAGACTCAACCTCAATCCTCATCTGAGGCCGTGAAACAAGAGCAG…
	Protein	MNFTFTSDHLSSGDKQPSSGVVSASRVLLSGVPKFKSTPPPSLPISSPSSSFFSIPPGLSPAELLDSPVLLNSSSILPSPTTGALIGQSFNWKINSNPTTAAPNYNTREDNFYPDFTFQTQPQSSSEAVKQEQTQSYQQEQKPWSFQDQKSESNGEIKPQTVQRNSDDGYNWRKYGQKQVKASENPRSYYKCTFPGCPTKKKVEKSLDGQITEIVYKGTHTHPKPVKARRSSSSSASMALAIVNHSEQGKVVDGQENSFGSGQIEPNSVGTPENSSISIADDEIERGSQRSRSVGDEFDGGEEVFHGGDEREAKRWKGEAENECMSAATGNRTVREPRVVVQTKSDIDILDDGYRWRKYGQKVVKGNPNPRSYYKCTYPSCSVRKHVERAAHDLGSVIT…
FtPinG0007458900.01.T01	CDS	ATGGGGTTTATGGAGTTGCTAGGTTTACAAGACTTTCAAGGTTTTGATTCTCTTTTGGATGGTATGAGTACTAGTACTAGTATTATTAGTAATAATGATAATAAGAATAGCTATGGTGGGTTTCTAGAAGCTTCTGAGGTGTTGAATCAGGTGCCCACCACTCCAAATTCTTCCTCCATTTCTTCTGCCTCCATTGATGAGCAAGGTGGTGATAATACTAACCTTGCTAAGGAAGAAGGTGAAGTGCAAGATGAAGACCTCAAGAACAAGACTACTACTAATAAACAGTTGAAGGTGAAGAAGGCAAATCAAAAAAAGCAGAGAGAGCCAAGATTTGCTTTCATGACAAAGAGTGAAGTTGATCATCTTGAAGATGGTTATAGATGGAGGAAGTATGGC…
	Protein	MGFMELLGLQDFQGFDSLLDGMSTSTSIISNNDNKNSYGGFLEASEVLNQVPTTPNSSSISSASIDEQGGDNTNLAKEEGEVQDEDLKNKTTTNKQLKVKKANQKKQREPRFAFMTKSEVDHLEDGYRWRKYGQKAVKNSPFPRSYYRCTAPACNVKKRVERCFNDPSTVITTYEGQHIHPSPAMTRGASGGSYLTGLLPDTGFSRGVANVPGMFNLPLQMGVIANSLSSTYSSNINNVIGSLPSSNTNHIRSNTLSNGSYDQSSQASAAILRDNGLLQDIVPSLMRVNED
FtPinG0006617300.01.T01	CDS	ATGGCAGAAAACGACGGCGTATCGTCCTCGAAACAGCCGCCACGGCCCACGATTGCACTTCCTCCACGGAGCTCCATGGATTCGTTATTCGGGTCGGGCGGGTTCGGGGCGAGCCCTGGTCCGATGACCCTCGTATCCAACTTTTTCACCGATACGGATCCTGAATCCGATTGCCGGTCTTTTTCTCAGCTTCTCGCCGGCGCTATTGTTTCTCCGGCCGGTGAAGGTACGAGCTCCGGCGTCGATATGCGGTTTAAGCAGAGTCGGCCAACGGGTCTGATGGTGACTCAGCCGCAGTTGTTTACTATCCCTCCCGGGCTTAGTCCGGCGAGTTTGCTCGAGTCTCCTGGCTTATTTCCTTCTCAGAGTCCGTTTGGCATGTCGCACCAACAAGCGTTG…
	Protein	MAENDGVSSSKQPPRPTIALPPRSSMDSLFGSGGFGASPGPMTLVSNFFTDTDPESDCRSFSQLLAGAIVSPAGEGTSSGVDMRFKQSRPTGLMVTQPQLFTIPPGLSPASLLESPGLFPSQSPFGMSHQQALPQVTSRVQHQHQHQSSMYMLQGSLPTSLSMNTIPASMAPFTSMHQDLLAPAQNSTMIRSREEYPHFLNPDERPQPSSIVVDKPADDGYNWRKYGQKQVKGSEFPRSYYKCTHPSCPVKKLVERSVDGQVTEIIYKGQHNHAPPQSNKRGKESNLNLQNQTNDAGLAFSLGRRDPEASHGAGECLSSSEDVGEEGDDGESDAKRRSLEGGMSEPGGANHRTVTEPRIIVQTTSEVDLLEDGYRWRKYGQKVVKGNPYPRSYYKCTHQ…
FtPinG0003761600.01.T01	CDS	ATGTCTTCTTCTACTACTTGCCAGTTTCCGGTCAACCTTAACTGCAGCGCCACCGCCACCCAAGAAAACCACCACGACCACAACCACCACAAAGACGATGAAGGCCGTGGTAAACTCCCCATCATCAATGAAGTTGATTTCTTCGCTGCTAACAATAACAAGGAAGAATTAGAACGCCCCATCAATGGTGAATCTGAGTCCAAGGATCGTGATAGTCCCAACAAGCTCGATTGCCTTGTTAATACCGGATTGAACTTGCTTACTACCAACACGAGTAGTGATCAATCCATGGTAGATGATGGAACTTCTTCGAATTGTGAGGACAAGAGATCCAAAAACAATGAGCTTGTGATGCTTCAAACGGAGTTACAAAATGTGAACTCCGAGAACCAAAGACTG…
	Protein	MSSSTTCQFPVNLNCSATATQENHHDHNHHKDDEGRGKLPIINEVDFFAANNNKEELERPINGESESKDRDSPNKLDCLVNTGLNLLTTNTSSDQSMVDDGTSSNCEDKRSKNNELVMLQTELQNVNSENQRLKDMLNQVTGNYNDLQLHFMTLVQQQQQQERHNNKDEVMNMEERKSSNNNGGQVVPSRQLLDLVLSSGKGRAETNDQISLSTSDQRSRERSSSPVNNTEVASRKEAVARDGSPEEQAGHGWNPHKVARLSPPKSSADQSAAEATMRKARVSVRARSEAPMITDGCQWRKYGQKMAKGNPCPRAYYRCTMAAGCPVRKQVQRCAEDRSILITTYEGNHNHPLPPAAMAMASTTSSAARMLLSGSMPSADGLINPNFLARTLLPCSSSM…
FtPinG0006017000.01.T01	CDS	ATGGAAGCAGCAGTAATCAAGATTGGGTGTCCAAATCGGTCGTCGGAGTTAGTTCGCCGTCGTGAGGGTACCACTGCAACACAACCGTCCGATGTTTATAAGACGGTTTCCAATCGCCTTATCTCCACCGTCTATTCCGGTCCCACTCTCGTCGATATCCAGAATGCCCTATTTGTCACCGGCTCCGATGCCTCTGTAGAACCTCCGTCTTCCGCTACTGATGACGTCTGCTTGTTAAGGGTGATGGGAATGGAGAGGGAGATGAACAAAGCAGAAAGTAAATATACATTGAAGATGAAGTGCAACGGTAATGGGGTTGCTGATGATGGGTATAAATGGAGGAAATATGGTCAAAAATCCATCAAGAACAATCCTAATCCTAGGAGCTATTATAAGTGC…
	Protein	MEAAVIKIGCPNRSSELVRRREGTTATQPSDVYKTVSNRLISTVYSGPTLVDIQNALFVTGSDASVEPPSSATDDVCLLRVMGMEREMNKAESKYTLKMKCNGNGVADDGYKWRKYGQKSIKNNPNPRSYYKCTNPRCGAKKQVEMSLEDPETLIITYEGLHLHFSFPHFFSGQSHADSPARKKLKTAEEENTHKQDDQQKQEEEINLVGLSHDSPGPTSELRGAGPLGLLEDMVPSNILKPSSSESSFSDNSYSPPVDSPPSPPSLLSWSPAYSPLFFEFDSNLDFILDVGI
FtPinG0002524500.01.T01	CDS	ATGGAATTCAAGGGGGAATTGGACGTCCGGGATGTAATGATCGACGAGCTAGCTCAAGGGAAGGAGCTAATAAAGCAATTACAGAGTCTTCTAATGGATGCTTCTGTTTCAATGGAGAAACGTCAGTTCTTGATGAATCAGATCATCTCAATCTACAATAAAGCTCTGAACTTGATTCGGTTTAATGGAGAGCCGATTGTACCAGATCCTTCTTTCTCGAGTTTGTTTGGTGGGGTACCTCAGAATTCGCCTTTTTCAGTCGCCGGAAATAGTCACATGAGTTGCAGGAGCTCCGACGTTGATGAAGAACAACTCCGGCCATCCAAAAAGAGAAAAACATTACCTCGTCGAGTTGAGATGGTGAAGATGAACAACGGAGAAGAGCTTCCCGGCGATGGG…
	Protein	MEFKGELDVRDVMIDELAQGKELIKQLQSLLMDASVSMEKRQFLMNQIISIYNKALNLIRFNGEPIVPDPSFSSLFGGVPQNSPFSVAGNSHMSCRSSDVDEEQLRPSKKRKTLPRRVEMVKMNNGEELPGDGYSWRKYGQKFILGAKFRRGYYRCTHRHSQGCAALKQVQRSDEDPTVSQVIYVGDHTCNTTIQITGPSTSTHEPRVHLTLTQHPPQQQPQIPTKPQLTVQTEELNNGDQDKFYFRCFSFSTAVIDSDNADVDVAGWLLDESPVTSGSDQFQASPGKMNTPESDIRQVFTLEELDILDPNFGFDNPDLFI
FtPinG0005486000.01.T01	CDS	ATGGAGGATTACTGTTTCCCTGTAGGAGTTCATCCCTTTTCGTCGTCGTCATCGATGGCGGTCCCGCAGTTTTCGAGCTCTTTTAACCTAAACGAAGGGCTCGGTTTGATCTTTCAACCGAAGATGGAAGAAGCGGTGCAAGTAGGCGATGATCGGAATCGGATAATTCTTGATGGCAAGCATAAGGAAGGAGATCAAAATCGGATCGGTAAGAAACCGAAACCGAAACCGAAGAGGCACAAGTATGCGTTTCATACAAGAAGTCGTGTCGATATTCTTGATGATGGGTATCGCTGGAGAAAGTACGGTCAGAAAGCTGTTAAAAACAACGTCTTTCCAAGAAGCTACTACAGATGCACACATTCAGGATGCGACGTGAAGAAGCAAGTGCAGAGGCTG…
	Protein	MEDYCFPVGVHPFSSSSSMAVPQFSSSFNLNEGLGLIFQPKMEEAVQVGDDRNRIILDGKHKEGDQNRIGKKPKPKPKRHKYAFHTRSRVDILDDGYRWRKYGQKAVKNNVFPRSYYRCTHSGCDVKKQVQRLSKDDEIVVTTYEGIHTHPVEKCTDNFEHILKKMHIYVPP
FtPinG0007227700.01.T01	CDS	ATGACATCAACAACTCCAGCTCCAGAATTTGAGGTCTCTGAATTCTTCATGTTTGAGAGTTACAACAGTACAGATGATCTTTCCACCGTGGTTTCTGCCTATTTTCAAGAGGCCAGTGGCGGGATTCGTTGCAGCCCGACTCAAGTAGAGACTAGCTCAAGAGTTGATAGGAGTGCAGAAAGAGAAGCAAGGGTGCGCATTGCATTCAAGACCGAATCTGAGATTGATTCACTTGACGATGGTTACAAGTGGAGAAAGTATGGAAAGAAGATGCTCAAGAACAGTCCAAACCCAAGGAATTACTACAAGTGTTCCGTCAATGGGTGCCCCGTAAAGAAGAGAATCGAACGAGACAAATATGATACGAGGTATGTCATCACAACCTACCAAGACGTCCAC…
	Protein	MTSTTPAPEFEVSEFFMFESYNSTDDLSTVVSAYFQEASGGIRCSPTQVETSSRVDRSAEREARVRIAFKTESEIDSLDDGYKWRKYGKKMLKNSPNPRNYYKCSVNGCPVKKRIERDKYDTRYVITTYQDVHSHPTSN
FtPinG0006962300.01.T01	CDS	ATGGATATTCAAGAAACCCTAATGGTTGAAGACGAGCTTTTGGAGCTGTACGAGGCGTTCTACCCAAACACAATGGCTCGGCCACCGCATCCTCAACCACCGCCACTAACACCAGTCGAGGAGCAGCTTCAGCAGCTAGCTGTGCTGCAGAATCTTCAAGTTCAGCATCAGTTTCAGCAGCCACAAGAGCTACAGCAGACCCAGCGCAAGGGCACTGGAATCAGAAACAAGAAGACAAAGCAGTTGAAGACGGTTTACAGGGTGCCGGCGGAGAGTATCCTGACTGTTGATAAATGGGCTTGGCGCAAATATGGACAAAAGCCCATCAAAGGCTCTCCCTTTCCCAGGAATTACTACAGGTGCAGTAGCACAAAGGGGTGTACGGCCAGAAAACAAGTG…
	Protein	MDIQETLMVEDELLELYEAFYPNTMARPPHPQPPPLTPVEEQLQQLAVLQNLQVQHQFQQPQELQQTQRKGTGIRNKKTKQLKTVYRVPAESILTVDKWAWRKYGQKPIKGSPFPRNYYRCSSTKGCTARKQVERSLAEPEVYVVTYTGEHFHPWPLHRNALAGISRADHRSCSGAHRDVRPSNTVSHVEFRSPQLPPPEEEEEGEGLLIPNRMYVDEDMLRGMEELGKWKTTNASYTGSGLDGPGFS
FtPinG0006202300.01.T01	CDS	ATGAGGAAGGCTAGTGTCTCGTTTCGTGCCCGATCCGAAGCACCTATGATTAGTGATGGCTGTCAATGGAGGAAATATGATCAAAAGATGGCCAAGGAAAACCCATGTCCTCGAGCTTATTATCAGTGTACAATGGCTAACGGGTGCCCAGTTCGTAAACAGGTACACAGATGTGCCGAGGATATATCTATTCTTATAACAACGTATGAAGGCAACCACAACCACCCATTGCCACCAGCCGCCATGGCTATGGCGTCGACCACCACAGCCGCCGCTAGCATGCTCTTATCGGGCTCGATGCCGAGCGCAGACGGGTTAATGAACCCTAATTTTCTAGGAAGAACAATCCTTCCATGTTCCTCAAGCATGGCAACAATCTCCACTTCAGCACCGTTTCCT…
	Protein	MRKASVSFRARSEAPMISDGCQWRKYDQKMAKENPCPRAYYQCTMANGCPVRKQVHRCAEDISILITTYEGNHNHPLPPAAMAMASTTTAAASMLLSGSMPSADGLMNPNFLGRTILPCSSSMATISTSAPFPTVTLDLTHSSSTNPIPHFQGGESPQAQVPPPTRPIGPAQAQQISRMPNQVLYNQSKFSGLQMSNQEVHHQEAGANNHTLLPHLQQTQQHGTAFADSFNAATIVIAYDPNFTLP
FtPinG0003815100.01.T01	CDS	ATGGAGCTTACTGAGGTAGACATGACCAGTGCTTCAAAGCCGAGCTCTTCGAGTCTCGAAACCTTCTCAGAGCTTCTAACCGGTGCTATTGATTCCTCGCCGTCTTCCGTTACTGTTCCTTCGGAGATTTCTGTGGCCGCCATTAGACCTAAGACTGTAAGAGTTAATCCAATGGGCGAAGTATTGAGTACGTCTACTCTTTCTCCATCATCTCATAATGTATCTAAGCAATTGGAAGGGAAACCCTCGGTGGTATACAAGCCATTAGCAAAAGTTGTGTCTAAGGCAACACTCTCACTTTTAGCCACTATGGGAGATCCGAAGATTGCCCAACCACATATTCTATCACAAGTCAATTCGGATCCACAACGAATGAGGTTTGATACACTTCGTTTGACA…
	Protein	MELTEVDMTSASKPSSSSLETFSELLTGAIDSSPSSVTVPSEISVAAIRPKTVRVNPMGEVLSTSTLSPSSHNVSKQLEGKPSVVYKPLAKVVSKATLSLLATMGDPKIAQPHILSQVNSDPQRMRFDTLRLTNQPPKPVPSQVVVTTEEEPKSFGGNVNVDRSSYDGYNWRKYGQKQVKGSEYPRSYYKCTHPNCPVKKKVERSFDGQIAEIVYEEQHNHPKQQQPPKRSLSNAHGLMSKSSSIVSDRIGGLDIRLRNGEGFGLSTQSTYPNKLQSLDDDEPKRKRRKNENEEQEAGTSGEEVKEPRIFGHNVIGSET
FtPinG0002325700.01.T01	CDS	ATGTCTGATGAACTATCAGCAAAACTGTACCCAGATCATCAAGATCCAGATAGTTTTCCATTTACCACTAACGATTCACCAAACAGTTACTATTTTCACGAAAACTACCAGCAACAAGAACTAGGGTTCTTGGATGCTCCTCCATTTATGAACTTTAGTGATTTTAGTGATCAGAATCAACTGATCAATGAGATTACTCATCCACCAGAAACACCCAACTCGTCTTTCTCTTGTTCTTCGAATGACGAAGAATCTGACAAGCGAGATAAGCTCAAGGCGATCAAAGAGTCTGAAAATGAAGACTGCAATTCTAACAAAGGGGGTAAAATGAAGAAGAAAATAGAGAAGAAGGAAAAGGAGCCGAGAGTTGCGTTTATGACAGAGAGTGAGATTGATCAT…
	Protein	MSDELSAKLYPDHQDPDSFPFTTNDSPNSYYFHENYQQQELGFLDAPPFMNFSDFSDQNQLINEITHPPETPNSSFSCSSNDEESDKRDKLKAIKESENEDCNSNKGGKMKKKIEKKEKEPRVAFMTESEIDHLEDGYRWRKYGQKAVKNSPYPRSYYKCTTQKCTVKKRVERSFQDPSTVITTYEGHHNHPVPATMRGHVAGIFSHSLQFKPSSSFQIPNLHDQDLFHLNYVNNNAATNPQSIINSLANQQQISDYGLLQDLVPSILFKQEP
FtPinG0003701200.01.T01	CDS	ATGGCTTCACCAACACAAGAAGACCCAAAAGCCCCCAAGGAATCAAACAATTCCCCTCGTCTTCCTCCCAATCCGACCCCTTTTTCTGGTGTTACCCCGATTTCTACTCACAAATTCAACTACCCGTCTTTCTCTGCGCTTTTAGAGGGCGTTGTCAAGGCTGCAAATTTGGGTGCTTCTTCACTTCAACCGCTTAACCCCTCGCTCCAAAATCTCACTTTCAAGGGACAATTTGGAATGTCTCATCAAGAAGCCTTGGCATCTGTCACAGCAAAAGCTGCTCAGGTGCAACCTCCTGCCGAGTTTGCGAAGTTTGCACTAGTTACATTACCGAAAAATAAACCTGGGTTATCAGTCCCTCTGTCCTCAGATATACAATTGCCTGAGAAAAAGGATAAT…
	Protein	MASPTQEDPKAPKESNNSPRLPPNPTPFSGVTPISTHKFNYPSFSALLEGVVKAANLGASSLQPLNPSLQNLTFKGQFGMSHQEALASVTAKAAQVQPPAEFAKFALVTLPKNKPGLSVPLSSDIQLPEKKDNIEEQSKRSPSKQIDNPANDIAKTPYADGFSWRKYGQKQVKSSESFRSYYRCTHAGCVAKKKVHHTDCILGVDYKGNHNHDPPTKFKEKSPKTRTTDTMPFCKTPDVDTISAKKKLGDSDISASGTVNEQVEESNKCQGTTSMDVDEHDKKSNVVQRVTGQEQMLLPEEPDRSVDVNEQSMINVIKQTNSPSGLKRRMKDRARAHSEQLQKPPKQTKIVVHAAGDVGTSADGYRWRKYGQKIVKGSTNPRSYYRCTSAGCPARKHVE…
FtPinG0009522600.01.T01	CDS	ATGCCTCATCAGGGTTCTTCATCAACGTGGGCTAACCATGACCAACATACTTCAAACTTTGAACTCTCTCAAGCTCGAAAGGAGGTTAAACTAGACAAGCCTAAGGATGATGGTCACAACTGGAGGAAGTATGGGCAAAAGCCAACCAAGGATGGCATTTACTCGCGGAGTTATTACAAGTGTACTCATCGAGATTGTCACCCCGTAAGAAAGAGAGTGCAGCACGCAGTGGCTGGACACATAACCGAGGTCATCTATACGGGTCATCACAATCATCCACCATCTCGGCTAGTGCAAAGAGACACATCTACTCAAAAGCGTGAGATAATTGATTCGGTTGACACTTATACGACATTTGAGAAGGAGGAAGAAGAGAATGTGGCTTCTGCTCAAGGAACA…
	Protein	MPHQGSSSTWANHDQHTSNFELSQARKEVKLDKPKDDGHNWRKYGQKPTKDGIYSRSYYKCTHRDCHPVRKRVQHAVAGHITEVIYTGHHNHPPSRLVQRDTSTQKREIIDSVDTYTTFEKEEEENVASAQGTFEVVMSNGRVMEAKIVVQTKSDINVLDDGYRWHKYGQKAVKGNPNPR
FtPinG0004682800.01.T01	CDS	ATGGCAGAAAACGATGCCGTTTCATCCACAAAATCGACGGCACGGCCCACTATCGCCCTCCCTCCTCGAGCTCCAATTGAATCGTTTTTTGGGTCAGGTGGGTTCGGGGTGAGTCCGGGTCCGATGACCCTCGTCTCCAGCTTCTTCTCTAATACGGATCCTGAATCGGAATTTGGCTCCTTTTCTCAGCTTCTCGCCGGAGCTATGACTTCTCCAGCTACAGCTCCGGCTAATGAATTGGGATTTAAGCAGAATCGGCCGGAGGAATTGGTGGTTACTCAGCCTGTAGTATTCTCGATTCCACCTGGTCTCAGTCCCGCGTGTTTGCTTGGATCGCCTGGTTTGTTTCCGGGTCAGGGGCCGTTTGGTATGTCACATCAACAAGCACTAGCACACGTT…
	Protein	MAENDAVSSTKSTARPTIALPPRAPIESFFGSGGFGVSPGPMTLVSSFFSNTDPESEFGSFSQLLAGAMTSPATAPANELGFKQNRPEELVVTQPVVFSIPPGLSPACLLGSPGLFPGQGPFGMSHQQALAHVTAQAVQAQSNMYMQGSLPTSVATAPPPAMEQESLPSAPDSGVGSKEESPGETPPPSYIAIDKPANDGYNWRKYGQKPVKGSECPRSYYKCTHPGCPVKKKVERSHDGHVTEITYKGQHNHTPPQAKRGKDTGNPTSKVAEEQALLLSRRETESSQATGECLSGSEEAGDEATTHEDEPDAKRRNLEVGVSEPTAPHRTVTEPKIIVQTRSEVDLLDDGYRWRKYGQKVVKGNPNPRSYYKCTYQGCNVRKHIERASTDQKAVITTY…
FtPinG0005089400.01.T01	CDS	ATGAATTACCCTAATTCTGAAACCCTAAATCTACCAAATTTTACCCAATTACTACCCACCGATCAAAACCAATTTCAAATTGATCATCAGCAAGTTTACCCACAACTTCAGCAAGTTCCTTTAGATATTGATTGGGTTAGTCTTCTTTCCGGCAACCCGCCCCCCACCGCGGGATCGTCATCCACTTCGTTTCCGAACGGTGGCTGTGGTGGCGGCGATTGCGTAAATGATGGTGGTCGTAAAGGGAGAGATGGTGTGGGAAGAAGGCGTAATGTTACTGATAAGAAGACAACTCCTCCGAGGTTTGCTTTTCATACACAAAGTGTCGATGATGTTCTTGATGATGGTTATAAGTGGAGAAAATATGGGCAAAAGGCTGTTAAGAATAACATTCATCCT…
	Protein	MNYPNSETLNLPNFTQLLPTDQNQFQIDHQQVYPQLQQVPLDIDWVSLLSGNPPPTAGSSSTSFPNGGCGGGDCVNDGGRKGRDGVGRRRNVTDKKTTPPRFAFHTQSVDDVLDDGYKWRKYGQKAVKNNIHPRSYYRCTYHTCNVKKQIQRLSKDTSIVVTTYEGIHNHPSEKLMETLTPLLRQLQFLAQF
FtPinG0004814300.01.T01	CDS	ATGCTTGAAACGACGCTGTTTCAGATCTCAACCGCGAGTGATAAATATAACAGCAATAGCAATAGTAGTATGAATCATGAAATGGTTAGTGCTTCTGCGTTTCAGCCTTTACCCACTTGCGATTTACAAGGCGTGAGTCGTGATAATGGTGTCATGAATCATTCAATAAGCCCTAACCCACCTTCCTCAACTGATAGACTTCAGATGTGTTCGCCCAGAAATCCGATTACTAAGAGAAGGAAAAGCCAAGTAAAGAAGGTGGTGTGCATACCAGCAGCAAATAGCAAACAAGGTGGGGGAGAAGTTGTACCTTCTGATCTCTGGGCTTGGAGAAAGTATGGTCAGAAACCCATCAAAGGCTCACCTTATCCCAGAGGATACTACAGATGTAGTAGCTCA…
	Protein	MLETTLFQISTASDKYNSNSNSSMNHEMVSASAFQPLPTCDLQGVSRDNGVMNHSISPNPPSSTDRLQMCSPRNPITKRRKSQVKKVVCIPAANSKQGGGEVVPSDLWAWRKYGQKPIKGSPYPRGYYRCSSSKGCPARKQVERSRTDPNMLVITYTSEHNHPWPTQRNSLAGSTRIPFKPGPHKVVYMKEETDADNSLIKDKVEETGDGDDRKGLNDVVPDDQLMVSHMPSDYNDLFSDLRDLEADLFSQTGNRGDLEGDNIGGSKSMLDPYSSLYDWTTNRSQHEDK
FtPinG0002493300.01.T01	CDS	ATGGAAGGCAGCTTCAACAACACCATTCTACAAGCAATCGCCGACGACCCTTTTGAAGAGAGAGGAATCTCCTCCTCCGACAACAGCGGTGGCTCTCCTCCCTCCACCGCCCGTCTCTCCGGTACTTCCTTCTCTTCCCCTAAAACAAGGAGAGGATTACAGAAGAGAGTAGTGAAGGTGCCGATTGGAGATAGCAGCTCTACTACACCGCCGTCTGATTCATGGGCGTGGCGCAAGTATGGTCAGAAACCGATCAAAGGATCTCCTTACCCTAGAGGATACTACAGGTGTAGCAGCTCAAAGGGATGTCCAGCACGAAAGCAAGTGGAGAGAAGTCGATCAGATCCATCGGTTTTAATGGTGACTTACTCGTACGAACACAACCACGCTCTCCCTATC…
	Protein	MEGSFNNTILQAIADDPFEERGISSSDNSGGSPPSTARLSGTSFSSPKTRRGLQKRVVKVPIGDSSSTTPPSDSWAWRKYGQKPIKGSPYPRGYYRCSSSKGCPARKQVERSRSDPSVLMVTYSYEHNHALPISRNNHHISAAAQAQSTGTSLNATSSSHVDLKKEESHHSVNATTSSNNIQNRQLVDEKYADLTSADVESMVTMTDDLDWTFGHMETTSSAILDHPIFSSSSTPPAGDDLSRYFRPAMGDEDESLFADLGELPECSVVFGS
FtPinG0002142900.01.T01	CDS	ATGGCTGTTGAACTAATGATGGGAAATTACAAAGGCACCACCTCCTTAGCCACCAAGATGGAGGAGAACGCCGTCCGGGAAGCCACTACCGCCGGCCTTCAAAGCGTGGAGAAGCTAATCAAACTCCTCTCTCAATCTCACCAACAAAACTCCCCTGAAAACCCCAGCTCCTCCTCAGATTCCGACGACTACAAAACCGTCGCCGATGTAGCCGTCAACAAGTTCAAAAAGGTAATTTCTCTACTAGACCGGAACCGAACCGGTCATGCCCGGTTCAGACGCGGCCCACTTCCACCACCTGAACCCAGTCAAACCCCAATTATAGAGCCCAAGCCTCACAGATCCGCTTTCACCAGAATCTACAGCTCCTCCCACATCTCTCAACGGTTACCTCCGCTC…
	Protein	MAVELMMGNYKGTTSLATKMEENAVREATTAGLQSVEKLIKLLSQSHQQNSPENPSSSSDSDDYKTVADVAVNKFKKVISLLDRNRTGHARFRRGPLPPPEPSQTPIIEPKPHRSAFTRIYSSSHISQRLPPLPISGSHHLPKTVKETSTTINFSASPSISQANSYISSLTGDTESMTASMSSGFQITNLSNVSSAGKPPLSTSSLKRKCTSVDDKCGGSSSGRCHCSKRRKSRVKRVVRIPAISQKIADIPPDEYSWRKYGQKPIKGSPHPRGYYKCSSVRGCPARKHVERALDDPAMLIVTYEGDHNHSQSVTEVAGAVVLESS
FtPinG0008726200.01.T01	CDS	ATGAGCTTCACAGATTACAGCTTCCATGGATCCATGGATAATTACAGTTCGCTTTCTCCATTGCAGATGATATCAGCGTCGATCGAAGGCGATCCGAAGCTGAACTCGTCGTCGGTGTCGTCATCGTCAACTGAAGGCGGCGCCGGTGGAAGCAATGATCACCGGAAAGAAAAAGATCAGCAGGTTCAAGGATCTGAAGATAATCATCTAGGAGCAGAAGACTCCACTAGTAAAAAAGGTGGGAAAGGGAAGAAGAAAGTGGAGAAGAAGAAAGAGCCGAGAGTTGCATTCATGACGAAGAGTGAGATCGATCAACTTGAAGATGGTTATCGATGGAGAAAATATGGGCAAAAAGCAGTAAAGAATAGTCCTTATCCAAGGAGCTACTACAGATGCACA…
	Protein	MSFTDYSFHGSMDNYSSLSPLQMISASIEGDPKLNSSSVSSSSTEGGAGGSNDHRKEKDQQVQGSEDNHLGAEDSTSKKGGKGKKKVEKKKEPRVAFMTKSEIDQLEDGYRWRKYGQKAVKNSPYPRSYYRCTTQKCTVKKRVERSFEDPSTVITTYEGQHNHQIPVTLRGHLSTATGIFSHPLLSSTTPTSLLFPQHHQNLFLHTNNGFGRGNIGSLGYNTNNHNATPVQSSALSSDVGYRPHDLTHLMRQQQIHDHGLLQDLVPSFILKQEP
FtPinG0001921200.01.T01	CDS	ATGGAGGGGATTGTAGAAGCTAACAAAGCAGCTGTGGAGAGTTGTCATGCTGTGCTTAATTTACTATCCCAACCACAAGATGAAGCTCAGAAAAGAAGTTTAATGGCTAAAACTGAAGAATCAGTGACCAAGTTCAAGAGGGTTGTGTCTCTTCTTAACAATGCGATGCATTACCAGCTTCTTCATCAACAACAACAGCAGATGCAACAAAGGATTCAGCTTCAACCACAGCAAAAAAATCCAGCTGAGATTTGGTACCGGAAAAGCAACAGTGGTGTGAATCTGAATTTGGATAGCTCTAATTGCACACAGACCGTTTCGTCTACTACTAGGTCATTCATATCATCATTGAGCTTGGATGGAAGCGTGGCGAATGGGAGTGGCAATGGGTTCAGTTTA…
	Protein	MEGIVEANKAAVESCHAVLNLLSQPQDEAQKRSLMAKTEESVTKFKRVVSLLNNAMHYQLLHQQQQQMQQRIQLQPQQKNPAEIWYRKSNSGVNLNLDSSNCTQTVSSTTRSFISSLSLDGSVANGSGNGFSLIGAAQSSDHNSSLHKKRCSGRGQDGSVRCGSSGKCHCSKKRKHRVKRSIRVPAISNKNADIPTDDYSWRKYGQKPIKGSPHPRGYYKCSSMRGCPARKHVERCLEDSSMLVVTYEGEHTHPCLQSQSTNA
FtPinG0001428200.01.T01	CDS	ATGAATGAGAGTAATGACAGAGCAACAAAGACCTCAGAAGAAGATGGATATAAATGGAGAAAATATGGACAGAAGCAGGTGAAGGGTAGTGAATACCCTCGAAGTTACTACAAATGTACACATCCTACTTGTCTGGTTAAGAAGAAAGTCGAACGCTCTCATGATGGTCAGATTACAGAAATCATATATAACGGAGATCATAATCATTCTAAATCACAACCTAGTCGCAGACCCACAGTTGGTTCAGCTGTTCTCTGTGGAGACTCGTTCGAGATCGGCAAAGGTAGCGGTAGCGGATCAGACGTCAAGGCTGACCCGGTTTGGGAAGAGATGCAACAAGGCTTGGACATGACACCGCCAACATCTGTTGTCACTCAAGTTTCTGACATCGCTTCAACA…
	Protein	MNESNDRATKTSEEDGYKWRKYGQKQVKGSEYPRSYYKCTHPTCLVKKKVERSHDGQITEIIYNGDHNHSKSQPSRRPTVGSAVLCGDSFEIGKGSGSGSDVKADPVWEEMQQGLDMTPPTSVVTQVSDIASTLSSHDEEDEDDVTQGKRRYK
FtPinG0004464200.01.T01	CDS	ATGTTTCTGTTCAGCGGAAACAGGAAAAAAAAGGAGGCGCGTGGGGCTCAGCCGCCTCCGTGTAGTGTGGTTCAGCCAGACGAAGATCAGACACGACTTGTGCCCAATGAGGTTGACTTTCTTTCCCGTCATGGTCAAGCGACTGGATGGATTGAGAAGCAAAAATCTCAAGCTGCTGATTTGAATGTAAATACTAGGTTGCAGCTTCTCACCGGGATCGTGAATGACGGAATACCTAATCCGCATGCACAAGACAAAAACTCAACAACCCAGGTAGCAACATTACAAGCGGAACTTAAACGGGTGATCGACGAGAACCAGGCGCTGAGGTCAATGCTTGAAGAAGTTATCCAAAGTCACAATTCTCTACAAATGCACATACTTACATTCTTGCAACAA…
	Protein	MFLFSGNRKKKEARGAQPPPCSVVQPDEDQTRLVPNEVDFLSRHGQATGWIEKQKSQAADLNVNTRLQLLTGIVNDGIPNPHAQDKNSTTQVATLQAELKRVIDENQALRSMLEEVIQSHNSLQMHILTFLQQQQNQNQNLQATSQELGVQAIPETGDHNQGGSRQCSGMVPFGTAHNQEDHETSLEEPRVDDMDMSQDSEEEERVVNKVNKLSDSLNPSWTSHQASGSMELVTRKARVSVRARSDEPIINDGCAWRKYGQKMARDNPFPRSYYRCSMADGCPVRKQVRFFRSLSIYLIISLFH
FtPinG0002177700.01.T01	CDS	ATGAATGGGAGTGATGATTCGGTTGATGGTTGGAGGAGGGAGCTCATGTTGAGCCCTACGGAGCCTTTTCCAGGTTTTGCATCAGATCCTTGTTTTAATAAACCTGACGGTGAAGTCACTGTGCTTGATTCCAATGGTAAGATTGATGATCATGATTCTGCGCTGGAACATGAAAATAAGTTGGAAGAACGTGAAAATGGATTGAGTTTATTGGTTGACACGGATAATTATGTGGTAAAGTCTGGTGGTAGTATAGCCGAGAGGAGAGCGGCGAAATTTGGCTTTGATGTGTCAAAGATTTCTACCTCTGGGTTTAAATCTAGCAGTTCTTTGGCTTCACCAACTGCTAAGTCACCATATCTTCTCAGAACCCCTGGTATTAGCCCAAGTGCTCTGTTG…
	Protein	MNGSDDSVDGWRRELMLSPTEPFPGFASDPCFNKPDGEVTVLDSNGKIDDHDSALEHENKLEERENGLSLLVDTDNYVVKSGGSIAERRAAKFGFDVSKISTSGFKSSSSLASPTAKSPYLLRTPGISPSALLESPMMLPNLQPSPTTGAFGLPHLGSESGIINSASSVAEKDSDDTYSFTFNPHGKPVSLSSYSVIQNQHPPKSLAQSSKFEVDCQHLASAQHPVNTGFEFPTQLQSDDIGNSSEINSPPDPKVSSDMVVKAVSMDYQTSNNSQDAANEMQQNECTQGEDAGIDYQDGDQKVVDLSGGTVSTSEDGYSWRKYGQKQVKGSEFPRSYYKCTHPNCPVKKKVEHSHDGQITEIVYKGVHNHVKPQPSRRSTFGSSVSCGEPLKVDEGGSV…
FtPinG0003093800.01.T01	CDS	ATGAAGGGCGAATGCGCTGGTTTCCAACTCTCCTCTCATTCATACGGTGTGCCTGATAAGGAAATGAGAGAGACAACAAAAATAGTAAATAGCGTCGGAGGTCAGTCTCTAGATGGAATCAAGAAAGGGGTCTATCCTAATCCTACAAAGACCTCAGAAGATGGATACAACTGGAGAAAATATGGTCAGAAACAAGTGAAGGGGAGTGAATACCCTCGAAGTTATTACAAGTGTACACATCCTACTTGTGTAGTTAAGAAGAAAGTCGAACGCTCTCATCACGGTGAAATTACAGAGATTATTTATAAAGGAGCACATAATCATCCTAAACCACAACCAACTCGGAGATCCACATTTGGGTCCGCGGTTCCTGGTGGGTACGTCAACCCGCCTGACCCT…
	Protein	MKGECAGFQLSSHSYGVPDKEMRETTKIVNSVGGQSLDGIKKGVYPNPTKTSEDGYNWRKYGQKQVKGSEYPRSYYKCTHPTCVVKKKVERSHHGEITEIIYKGAHNHPKPQPTRRSTFGSAVPGGYVNPPDPLWKDDTKVVLLLGSDWKSQGFDMTSSTSVVTQLSEKPVSSVETRSSPPHLLAMMMRRKKKKILLLKEAYL
FtPinG0004155300.01.T01	CDS	ATGTGGGCATGGAGGAAATATGGACAAAAACCCATCAAAGGCTCACCATATCCTAGGGGTTATTACAGATGTAGCAGCTCAAAAGGATGTTTAGCAAGGAAACAAGTAGAGAGGAACAGATCTAATCCAAAGATGTTCATAGTAACATACACAGCTGAACACAATCATCCTATGCCAACACACCGGAATTCTCTAGCCGGAAGTACTCGACAGAAGCCGGCAACAGCATCAGATGAGGCATCCCCTTCGAATAACAGTACTGGAAACGCTTCATCTCCGACAGTGAGCCATTCATCCGCCATGACAGAGAAAGCAGAGGTGAAAACGGAGTACGAGGAGGAAAACATGGCGAAAGATGAATCATCAGGGAATGAAATGGATTTCCCTGAAATGAATGAT…
	Protein	MWAWRKYGQKPIKGSPYPRGYYRCSSSKGCLARKQVERNRSNPKMFIVTYTAEHNHPMPTHRNSLAGSTRQKPATASDEASPSNNSTGNASSPTVSHSSAMTEKAEVKTEYEEENMAKDESSGNEMDFPEMNDDFFAGFEELDDMDTGDMFLEHQIQGRIEMEYPWLSNNSSSSSSTTTAAGGS
FtPinG0002334500.01.T01	CDS	ATGGAGGCTAAGGACTTGATTGAAGAGACGAATCAGATGAAACGCAGCGTTTCAACTCGATCCAGTCAAGATCGAGATGATATTTGTCTTAAGAAAGATGAACTGGAAGCAGCAAAAGCAGAAATAGGAGAAGTAATCAAAGAGAACGAACGACTGAGATTCAATCTTGACCGAATTATGAAAGAATACAAAACACTTGAGATGAGATTTCATGAAATCACTGGACAACAAGAATCGAAACCTAGGTTGGAAGATGAACAGCATTTAAATAAAACTGATGATGATGGTGATGATCGGCTTTCGCTTAGCCTTGGAAGAAATTTGAGTATCGATTCAAAGAACAAGGAGAAGATGATCGACGACTATCCTGAATTTAAGCAACAAGAAATGTTTAATGAG…
	Protein	MEAKDLIEETNQMKRSVSTRSSQDRDDICLKKDELEAAKAEIGEVIKENERLRFNLDRIMKEYKTLEMRFHEITGQQESKPRLEDEQHLNKTDDDGDDRLSLSLGRNLSIDSKNKEKMIDDYPEFKQQEMFNESRETRSPSKAFPVPTTGSDDGGGDDEDGQQPPVKRARVSVRARCDTPTMNDGCQWRKYGQKIAKGNPCPRAYYRCTVAPSCPVRKQVQRCVDDMSILISTYEGTHNHPLPISATAMATTTSAAAYMLMSGSSSSNNITLGSNHSAVTTTTANDLSTTLNFISDATRSTPPLFSSNSFSTAYPSSQPTITLDLTTNTNSSSSSSFAPRSSYSYPPITNLTFNSSDQNCSYRTRMGQPSMSVGPHDQNSLFYQTLLQNMTRNPNPNHR…
FtPinG0002710400.01.T01	CDS	ATGGAAGAGAAGCTTATAGTTCACGAAGCAGCCGCTGGTCTTGAAAGTGTTGAGAATTTTATCAAACTCATCTCGAAAACAGAACAACCTTTGCAACAGAGCGATAATGGCGGTTCTTCTAGTTCTAGGATCGATTCGAACTGCCAAGCGGTTGCTGAAGATGCCGTTTCCCGGTTCAAGCGTGTAATTTCACTTCTTGGTCGTACTCGAACCGGTCATGCCCGGTTCCGACGCGGTCCGGTTGTGCCTTCTGCTACCTTTGTTCCATTTAAGCCAAAAACAGAGCAAGAACAGAACCTTGTGCTGGAAAGCAGCGTCCCTGTTCTATGTCCAAAGCCGATCAAACAAGTTCCTATGGGAGTTCATCGCCAACCGTTCGATCTAGGAAAAGAACCAACT…
	Protein	MEEKLIVHEAAAGLESVENFIKLISKTEQPLQQSDNGGSSSSRIDSNCQAVAEDAVSRFKRVISLLGRTRTGHARFRRGPVVPSATFVPFKPKTEQEQNLVLESSVPVLCPKPIKQVPMGVHRQPFDLGKEPTTTINFSCSPTVMSGANSIKSTLTGDNEGVKPPPGLSTSSFQFTNYSNYSSYSGGGKPPLSTTSFKIKKCSFSDTTGRCGGSSSGRCHCSKKRKMRIKRVVRVPAISSRMADIPPDDYSWRKYGQKPIKGSPHPRGYYKCSTVRGCPARKHVERALDDPAMLIVTYEGEHNHSLPTLETTNLVLESS
FtPinG0003025100.01.T01	CDS	ATGCTCTTCTTTCAACTCAAATTCAATTCATCAATGGATTTCATTGGTTACAACAGCTTTGAGCGAGCCTCACTGATTAACGAGCTAACTCATGGGGTGGAGGCGGCTAAACAGCTGAAGGTGCAAATGGGTCCTGAGTATTCTGTTGAAAACAAAGAAATGCTTCTGCAGCAGATGATAGCATCCTATGATAAGGCTCTTTTCATCCTAGGATGTGGTGTGGTCTCTGAGCCGCCACATCAGCTTTTGCCCATGTCATCGCTTGCCATGCCAAGCACGCCACTTTCTGCCATGGAGAGTTCCAAGAGCGATGATCTGTATGCAGCATTAAGATCTCATCAGGATGCTAAAGGGCATTCAAAGAAAAGGAAAGCAAAGTCTAATTGTATAAAGCAAGTG…
	Protein	MLFFQLKFNSSMDFIGYNSFERASLINELTHGVEAAKQLKVQMGPEYSVENKEMLLQQMIASYDKALFILGCGVVSEPPHQLLPMSSLAMPSTPLSAMESSKSDDLYAALRSHQDAKGHSKKRKAKSNCIKQVKVNCGSIHDVPPSDGYSWRKYGQKDILGSKHSRSYYRCTYRSVQDCWATKQVQRSDDDPTVLNITYKEKHTCNMPRRSKSAPTSPGKQEHKSVVDLPITEYHTDSNMALNFQNTISADAQNIDSFLFSPTPVENPSVPPSTINLTSEFYGSIPQSLISQETSGSNFFLTSPSTMDTFASVQHTEQNFERDITEILSAATSVTNSPAIDPDFSLDSWSYGLNFQFNNL
FtPinG0000354800.01.T01	CDS	ATGGAAACATCAGAAGATTTGAAGAGATGGAGTGTGATGATGAATGAGCTGAGCCAAGGGAGGGAGCTTGCAAAGCAACTTCAGAACCATCTAGATCCTTCCAGCCCACAGGAGACGCGCGAGTACCTTATTGAAAAGATCCTCTCAACTTACAACAAGCTTCTCCACATGACCAATCTTGATTCCATTCAAGTAGATCCAAACTCCTTGATCGCCTTCAATGGCGAGTGTCCGAGTTCCATCTACCCTAGCTCAGACCTCCAGAATATCCATCGCGCCTCCAAGAAAAGGAAGACTTGGCCCAAAAGGGTTGAGACAGTAAAAGTGAGCACACAGGAAGGAGGAGCGGAGGGAAATGTAAATGATGGATATAGTTGGAGGAAATATGGACAAAAGACT…
	Protein	METSEDLKRWSVMMNELSQGRELAKQLQNHLDPSSPQETREYLIEKILSTYNKLLHMTNLDSIQVDPNSLIAFNGECPSSIYPSSDLQNIHRASKKRKTWPKRVETVKVSTQEGGAEGNVNDGYSWRKYGQKTILGATFPRGYYRCSHRSSRNCYATKQVQKSTEDPTLLQLVYKGHHTCGQPSASKNPPPVHHGSVRVLKPDSQPVKLQQTPQPQLMVKIEEPDTLDFDKILEEFLETAGETPASQWFVSGSPATSDSNQLPGCNAIWTPESDVIEHFGSGPDSPFGTLEFTFDEFGVIDPFFSFDDPKFF
FtPinG0001532600.01.T01	CDS	ATGGAGAAAGACAATCGAAGCCCGGAGAGACGAGAAGTGAAGACGTCGAGGAGTGAAAGTAAAGAAGAGGGCTCGGAAAGTAATGTTGCGAAAAGAGCAAGAGTTTCCATTAGAGCAAGATGTGAAGCGCCTACGATGCATGATGGATGTCAATGGAGGAAATATGGACAGAAGACTGCTAAAGGAAATCCATGTCCACGAGCATATTATCGATGCACCATAGCGCCTTCATGCCCCGTAAGAAAACAGGTTCAAAGATGTCCACAAGACATGTCGATCCTAACAACGACCTACGAAGGAACACACAACCATCCATTACCCGTTGCAGCAACAGCCATGGCTTCAACAACTTCAGCAGCAGCAACCATGTTAATGTCAAGATCATCAACCTCACAAGGC…
	Protein	MEKDNRSPERREVKTSRSESKEEGSESNVAKRARVSIRARCEAPTMHDGCQWRKYGQKTAKGNPCPRAYYRCTIAPSCPVRKQVQRCPQDMSILTTTYEGTHNHPLPVAATAMASTTSAAATMLMSRSSTSQGLSSITAPVTSTTANINGVNFTLFDNSTTRPYNFPNGSSLAPPTITLDLTTNTSTHLINRFSQAPKFSSTSLDFSSSSENIKFPTPWGNNSNYLNYNPSPPFNKTPFGSIGTLDFSKQPNGLTGNVRNSQSSSPSQQLFTETIAKVLTSAPSFQHAVAAAISNMVGSGNSTNSWRATGNGPNGYQNQVTGLATMAKPSFTSYTSNHSQSTLMSSLSHSKGSSSMAPSTSIDANNNQ
FtPinG0007552800.01.T01	CDS	ATGGTTACTGAAGAAGAAGTTATATCTGCTGCAACTCCTCAGAAAAACGAAATCCATGTTTCTGCCGGGCATGTTGTAGGCTCTGATCAAGATGGAAATACTCCGGCGGTACCCAAAAAGCCTTCTGAGGATGGGTATAGTTGGCGAAAATATGGGCAAAAGAATGTTAAAAGAAATGAATTTATTAGAAGCTACTACAAATGCTCATATCATAGCTGTCAAGTGAAGAAACAAGTGGAACATGCACATGATGGGCAGATTACGGATACTACTTACTTTGGGGAGCATGATCATCCCAAACCTCTAAATAATCTCCCAATTACCGTGCCATCCGTTGTCTCTGTCAAAGTTCAAATTGCAGATAGATCTCCGTCAACTATTGCTGAAGACAAGTCAACA…
	Protein	MVTEEEVISAATPQKNEIHVSAGHVVGSDQDGNTPAVPKKPSEDGYSWRKYGQKNVKRNEFIRSYYKCSYHSCQVKKQVEHAHDGQITDTTYFGEHDHPKPLNNLPITVPSVVSVKVQIADRSPSTIAEDKSTNALALKTEEGEPTDTNKLAVVETSTDRRVLAPPPTSE
FtPinG0008419400.01.T01	CDS	ATGAACTACATGGAAGGAGAAGGTGAACAACAACATCAACCATCATATATGAACACCACAAATATAGTACCTTATCCGACCCCAACCAACAACAACCAATATCTTCCTCAACTCGATCAAGAACCATTGCCCTTAGACATCGACTGGGTTACCCTTCTCAACGGATCGGCAAACCCTGGTTGTTCTTCTTTGGGGCCCGGAAAGAGTGGCGATGCGGGTGGGAGTAGTAGTAGATCGAGCAAAGGAAGAGTTTGTGGTGGTGGGAAGAGTAAGAAATCTAGGGTTACTCCGAGGGTTGCGTTTCATACGACAAGTGTTGAAGATGTTCTTGATGATGGGTATAAGTGGAGGAAATATGGACAGAAGTCAGTCAAAAATAGCCTTCATCCCAGGAGCTAT…
	Protein	MNYMEGEGEQQHQPSYMNTTNIVPYPTPTNNNQYLPQLDQEPLPLDIDWVTLLNGSANPGCSSLGPGKSGDAGGSSSRSSKGRVCGGGKSKKSRVTPRVAFHTTSVEDVLDDGYKWRKYGQKSVKNSLHPRSYYRCTYHTCNVKKQIQRLSKDTSVVVTTYEGVHNHPSEKLMETLAPLLKQLQFLGRF
FtPinG0002810600.01.T01	CDS	ATGTCTTCCATCACCGAGGAGGGAAGCGTCTCCAATGGAAAGCAATTCGGAACCTTGTCTTCCTTGTTCTTACAGCCGGCTGCAAAACCTCCGCTATCCTCCTCTTCCTCATTCAGCAGGAGGTGTCATGATTCCGATTATTTCTCAGGCAAAGTCTCAGGTTCCAGCTCCTCCCGCTGCCACTGCTCCAGGAAGAGGAAATTGCGTGTTAAGAAGACAATTAGGGTTCCTGCTGTAAGTTCAAAGATATCAGACGTTCCGGTAGACGAGTACTCATGGAGGAAATACGGCCAGAAGCCAATCAAAGGCTCTCCATACCCACGAGGGATACTACAAATGCAGCACAGTGAGATGATGTCCAGCCAGGAAGCATGTGGAGAGGGCATCGGATGA
	Protein	MSSITEEGSVSNGKQFGTLSSLFLQPAAKPPLSSSSSFSRRCHDSDYFSGKVSGSSSSRCHCSRKRKLRVKKTIRVPAVSSKISDVPVDEYSWRKYGQKPIKGSPYPRGILQMQHSEMMSSQEACGEGIG
FtPinG0003193100.01.T01	CDS	ATGCCGAACTCGTCACCGGCCGCAAAACCCCCGCCGTGCACGTCTGCACAGAGGCCCGCTAAGTGCACCGGCGGGACTTCAGGCCGTTGCCACTGCGGCTTTTGCAGAAAGTCAAGGATGAAGAGGGTGATCATAAGAGTACCAGCAGTGAGCATGAAAATGGCGAATATGCCAATGCCGATGGATGACTACTCATGGGCAAACGTCCCTCCGGATGACTTCACGTGGCGCAAATACGGGCAGAAATTCATCAAGGGTTCACCTCACCCCAGGGGATACTACAGATGCAGTAGCGGGTCGGGCTGCCCGGCGAGGAAGCAAGTGGAGAGAGCTCTGGACGACCCGTCGATGTTAAATGTAATCTACGAGGGCGAACACAACCACTGCGGCTCCCATAAC…
	Protein	MPNSSPAAKPPPCTSAQRPAKCTGGTSGRCHCGFCRKSRMKRVIIRVPAVSMKMANMPMPMDDYSWANVPPDDFTWRKYGQKFIKGSPHPRGYYRCSSGSGCPARKQVERALDDPSMLNVIYEGEHNHCGSHNSVVSKFVLESS
FtPinG0009186100.01.T01	CDS	ATGTCATCCTCCATCGCTACTTTCAACGACTTATCACCTTCGCAATTCATGAACTTCTTCCCCGCCGACGACGACAACAATCATCATGATAGAATTGATTCCGTCGGTTGGAGTGCTTTCGAACAACAAAATGCAATCACTAATCAAACTTACTCTGAACAGCCTAAGTTCAAATCCATGGCTCCTCCTTCGCTTGCTCCTGTTTCATCCTCTTCTTCGTCTTACCTAATTAGCCCTCTTTCGTTTAGTCCTTCTGTTTTCCTTGATTCTCCCTTGCTTTTCCCTAATTCCACTAATTTCTCATCTCCAACTGTCGGAATTGCTTTTACTGGGAACAACGAGCAGAAACCAGATGCTTCTGTTACTGGACTACAAGATGGAGGCTCCGCCTTCTCCTTC…
	Protein	MSSSIATFNDLSPSQFMNFFPADDDNNHHDRIDSVGWSAFEQQNAITNQTYSEQPKFKSMAPPSLAPVSSSSSSYLISPLSFSPSVFLDSPLLFPNSTNFSSPTVGIAFTGNNEQKPDASVTGLQDGGSAFSFQPQIRSSTTASASSSMFQSLISNESSFENQFQEMNNSKSEVQLIHREKPKIEQVVQRSGSQPSYQYIRSSKTSEDGYNWRKYGQKQVKGSENPRSYYKCSYPNCPTKKKVEMTIEGHITEIVYKGSHNHPKPQPRRSSYDNSEPSLPLTMDPSPALTPETSSVSMEDDDEFDQTSAMSLIRPVKDDINEPESKRWKGETETEAMSAYGSRAVKEPRVVVQTTSEIDILDDGYRWRKYGQKVVKGNPNPRSYYKCTSIGCPVRKHIE…
FtPinG0000171800.01.T01	CDS	ATGAACGGGAACTTCCATGGCGATTTAGCTGATGTTGTTCGAGACGTCGTCGGAAACCCTAGCTTAAGTAACTGCAGTAGCTTTCCGGTGTCTGAACTTCCGGTGGCTGATCCGTTGAACATCGATGAAGGTTTCGGGTATCCATTTTCGAGTATGAGAGACCCGTTGCTCACGGAGCTTGAAGTCGATATTCATGGCGATTTCATTAGAGATTTGAGTGATGATACTGAAGTTGTTCTTCCTGATGCGTTTCAGATCTCGAGTATTAGTGGGAATATTAGTGATGATCTTAACTGTACTGGATTTGCACCTGTGAATCCAAGTAGCCCTAAAACGACGTCTTCTTCTTCTTTGATTGATACGTCCAGAGTTCAGATCTCTTCGCCGAGAAATACGATC…
	Protein	MNGNFHGDLADVVRDVVGNPSLSNCSSFPVSELPVADPLNIDEGFGYPFSSMRDPLLTELEVDIHGDFIRDLSDDTEVVLPDAFQISSISGNISDDLNCTGFAPVNPSSPKTTSSSSLIDTSRVQISSPRNTIIKRRKSQAKKVVCIPAPTTANIRQGGGEVVPSDLWAWRKYGQKPIKGSPYPRGYYRCSSSKGCSARKQVERSRTDPNMLVITYTSEHNHPWPTQRNSLAGSSRISASTSSSSSKPSPPPLTTAATVKEEKTTVDDSSIKTVHETINNRIEPEDQSKRNGVVVMPSQMSMNELVFDYNKSYRPVMQDDVTNSDNHHQDFFAELRELEEIDPLNKSMLEIDPFSSLFDWSSNSTSNNDEYRNRHENSS
FtPinG0002864000.01.T01	CDS	ATGGAGTTAAATTTGAATCTCAAGATTGGAAGTAATATGGACATTGATCATGGCGACAGCACTCTTCGGCTTTTCGATGAATCGCCCCCTCGCAGTCAAGCTGATCATCGTGATTCTCAGGGTGAAGTAGGAGAATCAACTGTTTTGTTAGCTGAGAAAGTGAAGAGAGTAACTGCAGAAAACAAGAGACTTACTGAAATGCTTGCTGTGGCGTTTGAGAAGTACAATGCATTGAAAACTCAAATGGTGGATTATATGTCCAATACTAATGATAACACCGGTAAGAGAAAATCTCCAGAAGTAAACAACAGCAACAATAACAACGACAAAACGAGTTCTAGTGACGAGGAAGACGACTCGAGTGTGAAGAAGCATAAGGGGGAGACTGTAAGTACAGTT…
	Protein	MELNLNLKIGSNMDIDHGDSTLRLFDESPPRSQADHRDSQGEVGESTVLLAEKVKRVTAENKRLTEMLAVAFEKYNALKTQMVDYMSNTNDNTGKRKSPEVNNSNNNNDKTSSSDEEDDSSVKKHKGETVSTVTNISKTYVKTEASDTSLIVKDGYQWRKYGQKVTRDNPCPRAYFRCSFAPRCPVKKKVQRSLEDQSILAATYEGEHNHPPPSLPQDSTSGAAAITHQSTGTTVTLDLTKPEPVTNLSAATYTTIVESSSNKAPELEFQKLIVEQMVCSLTKDPSFTAALATAISASFMQQQQESKAKLRRIRKKEEDFNG
FtPinG0007226700.01.T01	CDS	ATGAACCACAAGCCCAAGATCTCTACCGCGTTCATCCGCGTAGACGAGTCTGATACAAGCCTTGCTGTCAAGGATGGATATCAATGGAGGAAATACGGCCAAAAGGTGACGAGAGATAACCCATCTCCGAGGGCTTATTTCAAATGCTCATTTGCTCCACTTTGTCCTGTTAAAAAGAAAGTGCAAAGGAGCGTGGATGACTCAACGGTTTTGGTGGTGACATACGAAGGGATGCACAACCACAAGAAGCCTCCAAGCGGAGCAACCCTTTCGCCTTCGGCTACTGAGGTTCTTATTGAAGCCGATGATGATGTTGCAGCAGGAGTGTTACAACCTCGGCTGATCGAGCAAATGGCTTCTTCTTTGACAAAAGACAACGCTTTCACATCCGCATTAGCA…
	Protein	MNHKPKISTAFIRVDESDTSLAVKDGYQWRKYGQKVTRDNPSPRAYFKCSFAPLCPVKKKVQRSVDDSTVLVVTYEGMHNHKKPPSGATLSPSATEVLIEADDDVAAGVLQPRLIEQMASSLTKDNAFTSALAAAIYSKVLQQKTSF
FtPinG0004914600.01.T01	CDS	ATGCTACAGTCTTACTGTAAGGATGAAGAGAAGGGAATGTGTTCTTTAGGGGCCGGAGACAATTTGGGTGTGAAATGTGGTGGTAGTATAGCTGAGAGAAGAGCGGCTAAGTTTGGGTTTGATGCATCAAAGATTAATACATCTAGGTTCAAATCTAGCAGTGCACTTGTGACTTCCCCGGCTTCTCCATCGCCATATCTTCTTAGAACACCTGGTATCAGCCCAGGTGCATTATTGGAGTCTCCTATGATGCTGCCAAATCTTCAGCCATCTCCGACCACAGGAGCTTTTCCTTTACCTCATTTGCCTTGTGAGAGTGGAGTGATCAAGTCAGAATCATCTAATGCAGAAAAGGACTGTGACGATACATCTTCTTTCACTTTTAATCCTCATGGAATA…
	Protein	MLQSYCKDEEKGMCSLGAGDNLGVKCGGSIAERRAAKFGFDASKINTSRFKSSSALVTSPASPSPYLLRTPGISPGALLESPMMLPNLQPSPTTGAFPLPHLPCESGVIKSESSNAEKDCDDTSSFTFNPHGISVPLSSYSAMQNQYPPGSSAQNSGLNFEFQHPAATLPPVTDDFEFPTQFPCEATGNISELNSPPDSKMSNDVAVKTDSNNQGDNTGNSGIDHPVEGDQRVVESSAGSVVNSEDGYNWRKYGQKQVKASEFPRSYYKCTHPNCPVKKKVEHSGDGLITEIVYKGAHNHPKPQPNKRSTFGSSLSCCESSIGYDDLKLGPDRRLDGLDTTCSTSITTENSNPPLVNEGKSPGELESEGTPERSSTLASNEENEEDTATEGNMQIAVNG…
FtPinG0006311800.01.T01	CDS	ATGAATGATGGATGCCAATGGAGAAAGTATGGACAAAAGATTGCCAAAGGAAACCCTTGCCCTCGAGCTTATTATCGTTGCACGGTTGCTCCAAACTGTCCCGTCAGAAAACAGGTTCAAAGATGTGCCGATGACATGTCGATCTTGATCACAACCTACGAAGGCACACACAATCACCCATTGCCAATCTCTGCTACCGCCATGGCCTCAACCACATCCGCGGCTGCGTATATGTTAGTATCCGGCTCATCTACGAGTAATAGCGGCATTGGATCAAATAGCAACGCATCTAACACAAACACAACCACAAACTTCCCTAGCAACTACGTCTCAAACTTCCCAGGCTTAAACTTCAACCTTTCAGACACCTCGAGATCAAGGCCATTCTTCTTACCCAAC…
	Protein	MNDGCQWRKYGQKIAKGNPCPRAYYRCTVAPNCPVRKQVQRCADDMSILITTYEGTHNHPLPISATAMASTTSAAAYMLVSGSSTSNSGIGSNSNASNTNTTTNFPSNYVSNFPGLNFNLSDTSRSRPFFLPNSSFLPSPSQPTITLDLTTSSSSSSSASQFSKLASTNYTPRPYPNTTTNLTFNSLELSNPNPNSNPLPFSWPPNGHQTYNKDGFYQTLFQKINPNPNPNVVSTPNPSNKPPPPPLDPVAAAAKAITSDPSFQSVLTAALSSLIGVNNNVNVGVNTGNQSSSTSSLLQATTDGGAKGNGCASSVIGIAPNNTTNAQTRNLMLLSSPLPFSNSSKSTSSSPGASREHHS
FtPinG0002688700.01.T01	CDS	ATGTTACCTTCTTCGATTCCAGGAGATGATGGTGATGATGATGAAGATCCTGATGATACTCGTGAGGATCTTCATCATCATCATCAGGGTGCGAGTTCTAACAATAGTAGCAACGATCTATGTGAAGCTCTTTTATTTTCATGTGCTAATAATAACCCTAAACCTAGAAATCTTCACCATGATCCTTCTTCTTTCATGGGTATTCCTTCAAATTCATGGGAGTGGGGATCTAGTATAAGGGAATCCATGGTGAACAAAGGGTTATTAGAAGGAGACAACGAAAGTGTCGAAGAAGATCATTACGACAACATTACTAATACGAACACGCTGAATAAGAAGATTAATCCTTTAGGGGTTTCGGCTTTTAGGATGAAGAAGATGAAGGCAGGGAGAAGGAAG…
	Protein	MLPSSIPGDDGDDDEDPDDTREDLHHHHQGASSNNSSNDLCEALLFSCANNNPKPRNLHHDPSSFMGIPSNSWEWGSSIRESMVNKGLLEGDNESVEEDHYDNITNTNTLNKKINPLGVSAFRMKKMKAGRRKVREPRFCFKTLSDVDVLDDGYKWRKYGQKVVKNTQHPRSYYRCTQDNCRVKKRVERLAEDPRMVITTYEGRHVHSPSHDNLDEDSNSSQPLLNKFFW
FtPinG0001770900.01.T01	CDS	ATGTCAGATCCTCAGGAATTCCCCTTTCCAAACGACATTTCATCATTTGATGATCATCAATTAGGGTTTTTTGGTGGTTCATACATCCATGGATCCATGGATTATGATTCTCTTTCAAACGCATTCGGACTCTCTCCTTCTAACTCCGAAGTGTTTTCCTCCATCGACAGCGATCAGAAGCAGCACCAAATTAAAGCGGTGGCCGCCGGCGGTGCTAATGCTTCGTCGGTGTCGTCGTCTTCAACTGAGGAAGTTTCAGAGAGGGTAGATCTCAAGGGTAAAGAGATGAAAGACGATGATTCCAGCAGTAAGAAAGGTGGGAAAGGGAAGAAGAAAGGAGAGAAGAAGAAGAAAGAGGCGAGAGTAGCGTTCATGACGAAGAGTGAGGTGGATCATCTA…
	Protein	MSDPQEFPFPNDISSFDDHQLGFFGGSYIHGSMDYDSLSNAFGLSPSNSEVFSSIDSDQKQHQIKAVAAGGANASSVSSSSTEEVSERVDLKGKEMKDDDSSSKKGGKGKKKGEKKKKEARVAFMTKSEVDHLEDGYRWRKYGQKAVKNSPYPRSYYRCTTQKCTVKKRVERSFEDPSIVITTYEGQHNHHVPATLRGHASGILSHPLSLMTSQGFHIPNHQELFLQMGGGSMAYATPQPPALPVSDHHLPDYGLLQDMMLPSFLYKQNP
FtPinG0007629700.01.T01	CDS	ATGGAGATCAATAATTATAGCCAGTTTGAACAATCCTATCTGATCAATGAACTCAGCCAGGGAATGGAGCTTGCTAGACAGTTAAGGGATCAAATGGGTCCTGAGCATTCAATTCAAGCCAAAGAGATGTTATTGCAACAGATTGTATCATCCTACGACAAAGCCCTTTTCATTCTAGGATGCGGTGCAGATGCTGAACAGCCACATCAGCTTATGCCCGTGCACTCACCCGCCATGCCCAGCTCTCCGAGTTCCATTGTCGAGAGCCCTTATGGAAATGATCTCAATACGAGATCAAATGGTCTTCAAGATGGCTCATTGAAGAGAAAATCGGCATCTACCTGGACGAAGCAAGTGAAAATGAACCCGGAGAATGGCCTTGATGGACCTCCTGATGAT…
	Protein	MEINNYSQFEQSYLINELSQGMELARQLRDQMGPEHSIQAKEMLLQQIVSSYDKALFILGCGADAEQPHQLMPVHSPAMPSSPSSIVESPYGNDLNTRSNGLQDGSLKRKSASTWTKQVKMNPENGLDGPPDDGYSWRKYGQKDILGAKNPRSYYRCTYRNTQKCWATRQVQRSEKDDTVFDITYRENHTCTMVRRSKSAPTSPGKQQEPKQEDFISAEYQQDSAMVMSFQTAPSQNNADIHNMDGFNSMALVSLESASPTYSTSTLNNSGLYGNLSTSLISPSTSSSNYFSMEADLADMMLAATSSTNSSTIPDFSLDSWNFNQELSFNDPGFFYEQKGSF
FtPinG0007768300.01.T01	CDS	ATGGAAGAAGCAGTAATCAAGATTGGGTGTACAAACCGGTCGTCGGAGTTAGTTGGCCCTCGTGAGGGTAGCACTCCAACACAACCGTCCGATGATCATAAGACGGTTTCCAATCGCCTTATCTCCACCGTCTATTCCGGTCCCACTATCGTCGATATCCAGAAAGCCCTATTTGCCACCGGCTCCTATGCATCTGTAGAACCTGGAAATATTTGCAGGGGGGTGGGAAAGGAGAGGGAGATGAACAAAGGAGAGAGTAAATATACATTGAAGATGAAATGCAACGGTAATGGGGTTGCTGACGATGGGTATAGATGGAGGAAATATGGTCAAAAAATCATCAAGAACAACCCCAATCGTAGGAGCTACTATAAGTGCTCACCAAGATGTGGGGCAAAG…
	Protein	MEEAVIKIGCTNRSSELVGPREGSTPTQPSDDHKTVSNRLISTVYSGPTIVDIQKALFATGSYASVEPGNICRGVGKEREMNKGESKYTLKMKCNGNGVADDGYRWRKYGQKIIKNNPNRRSYYKCSPRCGAKKQVEISLEDPTLIITYEGLYLHFSFPNFFSGQSHADSPAGKKLKTREEEKPHKLDDRQKQYGPVP
FtPinG0006083600.01.T01	CDS	ATGTCGAACAGAATCCCCAAAGTTCCCGTCAACGCCCCCGACAATCCCGTTCCAGTAGTTACCGGTTCGAACGCCGACTCCTGCTGGTCTTCGCTTGCAGCTGAACCGCTCTCCAATTACTATCCATCCTACTTCGGCGACTTCAGCTTGAGCATCAACCAGGACTCCTGCGTTTTAGATCGGAACTCCGACGTTTTGGCAAATCAGATAGGCATCAATGATGATCGGGAACGGAGTCACTTCTCGAGGTCCGCGGTGGCGTACGCTTCGGGAACTACTACGACTTCATCAAACCAATCGGTTTCCTCCTACTCGTCGGAGGATCTGCCGAAGAAGTCCAACGACTCTGGTGGTGGAGGATTTAATGCGACCACCGCTACATCGACTAAGGTTAAGAAG…
	Protein	MSNRIPKVPVNAPDNPVPVVTGSNADSCWSSLAAEPLSNYYPSYFGDFSLSINQDSCVLDRNSDVLANQIGINDDRERSHFSRSAVAYASGTTTTSSNQSVSSYSSEDLPKKSNDSGGGGFNATTATSTKVKKKVQKRVRLPRFAFMTKSEVDHLEDGYRWRKYGQKAVKNSPFPRSYYRCTHTECKVKKRVERFWEDPTVVITTYEGQHCHHTIGLTRGGFMSYENVLSTQFALPPPRFYYPGAKVQTGQDGSVDTIQSIDHLQDEVTRENSGVLAICNQSSGKIRMDQGLLEDIVSPRPRDS
FtPinG0005105500.01.T01	CDS	ATGGAAGTGAAGGCGGACTTGCCGGATTTAGGTGCTGCAGAGAAGGATGTAAAGATTGCAGATGAAGAAACCTCTGCAAGGGTTGAGATCAAAGATGAAGGAGACTGCTCAAAGACCTCTTCATCCAGAAAGGGAAACACCAGTTTCAATAAAGAGATTGAGATCAAAGATGAAGGAAATCCTAACAACAATATGGAGGATGAAGAACTGAAATCTACAAAAGCAGAGATGGGTGAAGTGAAAGAAGAAAATGAAAGATTAAGAAATATGCTAGACAAGGTTGAAAATGATTACCGAACTCTACAAATGCGCTTCTTTGACATACTGAAACGGGATCCTCCTCCAAAACCAATGGACAATCCCGAAACCAATGAGTTTGAAGGGTCTGAAATTTCTCTT…
	Protein	MEVKADLPDLGAAEKDVKIADEETSARVEIKDEGDCSKTSSSRKGNTSFNKEIEIKDEGNPNNNMEDEELKSTKAEMGEVKEENERLRNMLDKVENDYRTLQMRFFDILKRDPPPKPMDNPETNEFEGSEISLSLGISPVEPKFRDENTNTSEKSSKDQKFEVSDGLTLGLDLKCQSETDISDMATDDVSNEVGEAKEDELGETWPPGKVQKTLRSETEEPSESSVAKRARVSVRARCETPTMNDGCQWRKYGQKTAKGNPCPRAYYRCTLSPTCPVRKQVQRSPEDMSILITTYEGTHNHSLPVAATAMASTTSAAASILLAKSSTSQDVSSSIAPPTTTTNINGLNFTLYDTSRTRPFNLPNASSPTPPTIVLDLTTNPSPHLINHHHQPPRLASTS…
FtPinG0001878200.01.T01	CDS	ATGGCAGTCGAATTAATGGTGGGTAACTATAAAACAAATAGCTTCGTAGCCAACATGGAGGAAAATGCCGTCCATGAAGCTGCTACCGCCGGCCTTCAAAGCGTCGAGAAGCTCATCAAACTCCTCTCTCATAGACAACAACAACAAGTCTCCGATTATCAAGCCGTCGCCGATGTCGCAGTCGACAAATTCAAAAAGGTCATTTCCTTATTGGACCGGAATCGAACTGGTCACGCCCGATTTAGACGCGGTCCATTGGTTCCCACACCGCAGCAACCACAGTCCCAACGGTTGTTTCCACCGGTTCAGCCGGATCAGCCAAACCCGAATTTTTTTGACTCGAAACCAAATGGGTCCGGATCTGGATCCTCCTTCACCAGGGTCTACAGCTCTTCTTCC…
	Protein	MAVELMVGNYKTNSFVANMEENAVHEAATAGLQSVEKLIKLLSHRQQQQVSDYQAVADVAVDKFKKVISLLDRNRTGHARFRRGPLVPTPQQPQSQRLFPPVQPDQPNPNFFDSKPNGSGSGSSFTRVYSSSSQRSLPPIPNHLPPANMVLPKKAAIATAKTINFATSPAVSGANSYISSLTGDTESITPSMSSGFQITNMSNVSSAGKPPLSTSSLKRKCSPDDAKCGAGSSGRCHCSKRRKSKVKRVVRVPAISMKLAEIPPDDFSWRKYGQKPIKGSPHPRGYYKCSSVRGCPARKHVERALDDPSMLIVTYEAEHNHTLSVTDVTVLESS
FtPinG0006322300.01.T01	CDS	ATGGTGGATCAAAGGAGGACACAGGAGGAGCGATACATTATGGCCCCGATGCATAACATGGACACAAAAGAGCAACTTGTGCTTTCAAGACAAACTCATATGCAAAACCAACAACATCTGCAAAACCTACAACACCTACAATATCTGCAACAAGTTCATCAAGAACTTGTTCGAGAACAACATCCAATGATGCAAACTGTCCCGCGTAGTGTGAAGATCGGTGTCCCCCAAAAGAGAAAGGGGCCATCAAAGATCAAAACCGTGTACATGGTGCCTGCGGCGAATATCCATGCAGTAGACAGGTGGGCTTGGCGTAAGTATGGCCAAAAACCAATTAAAGACGCTACATTTCCAAGAAGTTACTACAAGTGTAGTAGCTCAAAGGAGTGTAATGCAAGG…
	Protein	MVDQRRTQEERYIMAPMHNMDTKEQLVLSRQTHMQNQQHLQNLQHLQYLQQVHQELVREQHPMMQTVPRSVKIGVPQKRKGPSKIKTVYMVPAANIHAVDRWAWRKYGQKPIKDATFPRSYYKCSSSKECNARKQVEMCKLEPEIYLVTYIGDHIHPSPIQPAQMPESILASLFPPVPPQSNIPLFQLHQQPEIFSSEPFKLPEAPSMLSETTLVPEEIPLKSSKIPTISEIMSAPIEKEVEDLLIPNMSKFVDEDTWGAMEELEMWKNWNSNYEPGSGIGFDSFGTTLKNWNNKNVDDSG
FtPinG0002374400.01.T01	CDS	ATGCAACTGCCGCCTCCGTCTCCTGAGCTAGGGTTTGATGGGTTAGGGTTCGAGTTCGATGAGCCGGGATTCGTGGGAGGAGATATCAATGAGCTGGAAGAGATGTATAAGCCCTTTGTGGTTCAAGTGGAGGAGCCTAAGCATGAGTCTCCTATGTCTAGTCAGACTGAGACGACTTCGCCTTGTTCGTCTTCCTTCGTCGTGTTTGATCATGATGATGATCTGGAGAGGCTAAATGAGGAGATGAAGGTGCCGGTTGATTTGGATGGGGAAAATCAAATCCAAGCAAAATTATCTTCTAAAAAAAGGAAAAGCAAGCACAAGAGAGTTAGGGTGGTCCATAGGGGTGTAGGAGAAGATGGAGCAGTGGTGATGGATAAGTGGAATTGGAGAAAATAT…
	Protein	MQLPPPSPELGFDGLGFEFDEPGFVGGDINELEEMYKPFVVQVEEPKHESPMSSQTETTSPCSSSFVVFDHDDDLERLNEEMKVPVDLDGENQIQAKLSSKKRKSKHKRVRVVHRGVGEDGAVVMDKWNWRKYGQKAIKGSPYPRCDL
FtPinG0009255800.01.T01	CDS	ATGATGATGCAGAGATCAGATGGAAGAGAAGCTGCTTCGAATAGTAATTTCGAGCATCAGCTTCGTCAAGTTCAATCTTTCTCAGTAAACCCATCTCCAGCAATTCAAGAATTAGGGTTTCCGCAGTTTGAAATTGATGCTCAAGAAACTCATCAGCTAATGATTATGAATTTCTTGAGTGCGTCTTCTTCGCGTGTATTGCCTCCACCGCCGGTTGGTGGTGGTGCGAGAGGCGGCGCTGGTGGGTCATCCGCTAATATGGAGTTTTCTTCCCGGAGTTCTGGGTTTGATAACTATGGCCACCGGGAAAAGCAGATTGATGTTCATCCTCAGGAGGAGATGGCGGCGGGTAATAAGGTTGTTGATAATGAAGATGTAGCCATTGATCCTAGTGGAGAT…
	Protein	MMMQRSDGREAASNSNFEHQLRQVQSFSVNPSPAIQELGFPQFEIDAQETHQLMIMNFLSASSSRVLPPPPVGGGARGGAGGSSANMEFSSRSSGFDNYGHREKQIDVHPQEEMAAGNKVVDNEDVAIDPSGDGGSSSSWWRSSSLERNKMKVRRKLREPRFCFQTRSDIDVLDDGYKWRKYGQKVVKNSLHPRSYYRCTHNNCRVKKRVERLSEDCRMVITTYEGRHNHIPCDDSNSSDPECFSSF
FtPinG0001212400.01.T01	CDS	ATGGAGAACAAGAAGCCATGTCAAAGAGACGATAATTACAGTCCTACCCTGACCAACGAGCTTCAACAAGGGAAGGATTTGGCAAGACAGCTTCAGATGCTTCTTCTTCAAGATCCACATTCTTCTACTTCATCTTCTAGAAGCTTCCATGATACTCGCGAGTTTCTGGTGCAGCAGATTATAGCTTCCTTTGATCGCGCCGTCTCCATGGCCAATCACCCATCCGATCCGCTCGCCCCGTCGCCTCCGCCGCTACCGCCGGTCAAATCAGAATCTCCGCTCAGCGGCAGCGAAGATTCCGATCCTGTTGGGGAAGATTCTACTCGAAGAAAAAGGGTGCAGCCGAGATGGACGACAAAGGTGCAGGTGAGCCCGGAAACCGGGTTCGAAGGACCACCC…
	Protein	MENKKPCQRDDNYSPTLTNELQQGKDLARQLQMLLLQDPHSSTSSSRSFHDTREFLVQQIIASFDRAVSMANHPSDPLAPSPPPLPPVKSESPLSGSEDSDPVGEDSTRRKRVQPRWTTKVQVSPETGFEGPPGDGYNWRKYGQKDILGANFPRAYYRCALKHQTNCPATKQVQRCDEDPCIFEVTYRSLHACNHPVINPNQPSSSSYNPNQPPPQRETLISFDPNNASFIIPKNSDLHNQHLLANPNPEFHFHASSMTATSAVLSTTTTAVRATSSASATSSPINITHDFPFDPFDDFDSTFFH
FtPinG0004764100.01.T01	CDS	ATGGACTACAAACACCGGAGCAGCTCATTTCCCGCCGGTGCCGATCAGGACGACCCACAAACCTCGTCGGAGCACGGCGGCGCTGATTCTCCAATCTCCGGTGACGATTCCCGTCCTACCACCACTGCTCTCTCCCCCAAGAAAGGGAGGAGAGGGATACAGAAAAGGGTGTTGTCCGTACCGATTGGTGACGTGGAAGGATCGAGGAGCGGCGGAGGAAGAGGGGAGACGTATCCGCCGTCGGATTCGTGGGCGTGGAGGAAGTACGGCCAGAAGCCGATCAAGGGATCTCCTTATCCAAGGGGATATTATCGATGCAGCAGCTCAAAGGGGTGTCCGGCTAGAAAACAAGTAGAAAGGAGTCGTGTGGATCCCACTATGCTCATCGTCACCTACGCT…
	Protein	MDYKHRSSSFPAGADQDDPQTSSEHGGADSPISGDDSRPTTTALSPKKGRRGIQKRVLSVPIGDVEGSRSGGGRGETYPPSDSWAWRKYGQKPIKGSPYPRGYYRCSSSKGCPARKQVERSRVDPTMLIVTYAGDHNHSLPASKQHHSSTSAAPTTAGSPPASPVAQPSATVNADMDDLELANSTDEVGLENGDELFTCAVELGLGGDALLPGFGWFSDVAIDAPCFVGPSCDDADMAMLPLGLSMREEDESLFADLDELPECSAVFSRGSSISTYQLGAAAAAAPLCSRTG
FtPinG0000299100.01.T01	CDS	ATGTGGAACTCAAATGAGCTGGAAACTTCCGCTGCTGAGTCGAACGGCGACGATGAGGTCGGAAGAGTCGGATCCAGTGGCGGTGGAGCGAGGTACAAGCTCATGTCTCCGGCGAAGCTTCCGATCTCGAGGTCACCTTGTCTAACGATACCTCCTGGCCTCAGTCCTTCTTCGTTTCTCGAATCTCCGGTTCTTCTTTCGAATATTAAGGCAGAGCCATCACCCACCACTGGCTCTTTCTTCAAACCTCAATTGATGCATGGATACGGAGGCTCCACCATATTCTCATCAATTATAAATAGCTGTAGTTCCATGGTTGGGAGTTCTTCAAGCCGCTTTGAGTTCCAACCCGCTTCAGGATCAATGTCTACTGCAGGTTTCTCTCTTGCAAGGCCGTCG…
	Protein	MWNSNELETSAAESNGDDEVGRVGSSGGGARYKLMSPAKLPISRSPCLTIPPGLSPSSFLESPVLLSNIKAEPSPTTGSFFKPQLMHGYGGSTIFSSIINSCSSMVGSSSSRFEFQPASGSMSTAGFSLARPSAPADSSNQQSGQSMQVQAQTLSRPFASSSIVRNEVAASSSQLSLSAPILEVSPIDTVPAPTDSDESNQKSLEVVQYTDHSGVASSMNERTSDDGYNWRKYGQKLVKGSEYPRSYYKCTHPNCEVKKLFERAPDGKIAEIIYKGTHDHPKPQPNRRLSAGSMVSIQEDRSDKFSSLASQEDKPSTISGQTPQNKDPTVIGELPAPKANENIVEVGLSPLNRPTDDADDDDDPFAKRRKMEIGGVDINSVIKPIREPRVVVQTLSEVD…
