# Supplementary material for: Genome-wide investigation of WRKY transcription factors in Tartary buckwheat (Fagopyrum tataricum) and their potential roles in regulating growth and development
Source: PeerJ. 2020 Mar 5;8:e8727. doi: 10.7717/peerj.8727 (PMC7060923; doi:10.7717/peerj.8727)
Supplement: Table S2 [file peerj-08-8727-s002.xls]

## Sheet: tartary buckwheat
Supplementary Table 2 Analysis and distribution of conserved motifs in tartary buckwheat WRKY proteins.
Motif	Width	Best possible match
MEME-1	29	LDDGYRWRKYGQKMIKGNPCPRAYYRCTH
MEME-2	15	DPSMLITTYEGEHNH
MEME-3	11	GCPVRKHVERC
MEME-4	50	DDGYNWRKYGQKQVKGSEYPRSYYKCTHPNCPVKKKVEHSHDGQITEIIY
MEME-5	21	RKHRKVREPRVAFMTRSEVDI
MEME-6	50	PLPIAAMAMASTTSAAAYMLLSGSMPSNDGIMNMNFLARTITICNFLMAT
MEME-7	30	VEQMAAAITKDPSFTAALAAAISSIIMQGN
MEME-8	48	EELAMLQAELERVNAENQRLKEMLAQVCQNYNSLQMHMVDFMQQQQNQ
MEME-9	20	ISASAPFPTITLDLTHNSST
MEME-10	29	VADVAVNKFKKVISLLDRNRTGHARFRRG

## Sheet: multi-species
Supplementary Table 2 Analysis and distribution of conserved motifs in multi-species WRKY proteins.
Motif	Width	Best possible match
MEME-1	22	YRWRKYGQKMIKGNPYPRSYYR
MEME-2	28	CTAQGCPVRKHVERCAEDPKMVITTYEG
MEME-3	35	DDGYNWRKYGQKQVKGSEFPRSYYKCTHPNCPVKK
MEME-4	15	VCFQTRSEVDILDDG
MEME-5	21	KHNHPWPAARNAMAGTTRAAA
MEME-6	36	VERSHDGHITEIIYKGQHNHPKPQPNRRYSAGSIMQ
MEME-7	29	LVEQMTAAITADPNFTAALAAAISSIIGG
MEME-8	40	VLQEELERMKEENQRLREMLDQVCKNYNALQMHFMEIMQQ
MEME-9	29	CYFSMATISASAPFPTITLDLTHNPNPLQ
MEME-10	15	KWRKMRVKWVVRVPA
