# Supplementary material for: Genome-wide investigation of WRKY transcription factors in Tartary buckwheat (Fagopyrum tataricum) and their potential roles in regulating growth and development
Source: PeerJ. 2020 Mar 5;8:e8727. doi: 10.7717/peerj.8727 (PMC7060923; doi:10.7717/peerj.8727)
Supplement: Table S3 [file peerj-08-8727-s003.xls]

## Sheet: Tarary buckwheat-Arabidopsis
Supplementary Table 3 One-to-one orthologous relationships between tartary buckwheat and arabidopsis thaliana.
FtWRKY Gene Name	FtWRKY Gene ID	AtWRKY Gene ID
FtWRKY13	FtPinG0004319300.01	AT3G04670.1
FtWRKY12	FtPinG0003025100.01	AT4G23810.1
FtWRKY12	FtPinG0003025100.01	AT4G11070.1
FtWRKY7	FtPinG0004829100.01	AT5G01900.1
FtWRKY29	FtPinG0005089400.01	AT1G64000.1
FtWRKY26	FtPinG0006083600.01	AT1G69310.1
FtWRKY31	FtPinG0000403800.01	AT2G47260.1
FtWRKY27	FtPinG0007458900.01	AT3G62340.1
FtWRKY31	FtPinG0000403800.01	AT3G62340.1
FtWRKY28	FtPinG0005089800.01	AT4G23550.1
FtWRKY30	FtPinG0006388000.01	AT4G23810.1
FtWRKY30	FtPinG0006388000.01	AT4G11070.1
FtWRKY49	FtPinG0006202300.01	AT1G62300.1
FtWRKY45	FtPinG0004682800.01	AT1G13960.1
FtWRKY45	FtPinG0004682800.01	AT2G03340.1
FtWRKY49	FtPinG0006202300.01	AT4G04450.1
FtWRKY49	FtPinG0006202300.01	AT4G22070.1
FtWRKY56	FtPinG0000354800.01	AT2G46400.1
FtWRKY52	FtPinG0002710400.01	AT2G23320.1
FtWRKY51	FtPinG0002688700.01	AT4G39410.1
FtWRKY67	FtPinG0002325700.01	AT1G29860.1
FtWRKY70	FtPinG0009255800.01	AT2G44745.1
FtWRKY71	FtPinG0005364100.01	AT4G04450.1
FtWRKY71	FtPinG0005364100.01	AT4G22070.1
FtWRKY67	FtPinG0002325700.01	AT4G18170.1
FtWRKY67	FtPinG0002325700.01	AT4G18170.1

## Sheet: Tartary buckwheat-Beet
Supplementary Table 3 One-to-one orthologous relationships between tartary buckwheat and beat vulgaris.
FtWRKY Gene Name	FtWRKY Gene ID	BvWRKY Gene ID
FtWRKY8	FtPinG0001878200.01	KMT19173
FtWRKY5	FtPinG0003193100.01	KMT19173
FtWRKY13	FtPinG0004319300.01	KMT13434
FtWRKY2	FtPinG0000299100.01	KMT12903
FtWRKY12	FtPinG0003025100.01	KMT11948
FtWRKY11	FtPinG0001921200.01	KMT10289
FtWRKY5	FtPinG0003193100.01	KMT09751
FtWRKY8	FtPinG0001878200.01	KMT09751
FtWRKY7	FtPinG0004829100.01	KMT06512
FtWRKY4	FtPinG0002493300.01	KMT04447
FtWRKY20	FtPinG0003001300.01	KMT19173
FtWRKY15	FtPinG0005008400.01	KMT17893
FtWRKY17	FtPinG0006962300.01	KMT16161
FtWRKY18	FtPinG0007313500.01	KMT13434
FtWRKY19	FtPinG0004914600.01	KMT14758
FtWRKY20	FtPinG0003001300.01	KMT09751
FtWRKY16	FtPinG0005548400.01	KMT01048
FtWRKY30	FtPinG0006388000.01	KMT20339
FtWRKY29	FtPinG0005089400.01	KMT20402
FtWRKY28	FtPinG0005089800.01	KMT20406
FtWRKY28	FtPinG0005089800.01	KMT16161
FtWRKY27	FtPinG0007458900.01	KMT09995
FtWRKY30	FtPinG0006388000.01	KMT11948
FtWRKY28	FtPinG0005089800.01	KMT12028
FtWRKY32	FtPinG0001732900.01	KMT10289
FtWRKY31	FtPinG0000403800.01	KMT09995
FtWRKY26	FtPinG0006083600.01	KMT08972
FtWRKY38	FtPinG0007629700.01	KMT20339
FtWRKY39	FtPinG0005111700.01	KMT17318
FtWRKY38	FtPinG0007629700.01	KMT11948
FtWRKY41	FtPinG0006617300.01	KMT06985
FtWRKY47	FtPinG0004237400.01	KMT18115
FtWRKY44	FtPinG0004671500.01	KMT12903
FtWRKY42	FtPinG0000497200.01	KMT07420
FtWRKY45	FtPinG0004682800.01	KMT06985
FtWRKY49	FtPinG0006202300.01	KMT04131
FtWRKY56	FtPinG0000354800.01	KMT20339
FtWRKY54	FtPinG0006322300.01	KMT16161
FtWRKY56	FtPinG0000354800.01	KMT11948
FtWRKY51	FtPinG0002688700.01	KMT09258
FtWRKY52	FtPinG0002710400.01	KMT09751
FtWRKY55	FtPinG0008708000.01	KMT01048
FtWRKY62	FtPinG0004155300.01	KMT20406
FtWRKY60	FtPinG0009522600.01	KMT17318
FtWRKY62	FtPinG0004155300.01	KMT12028
FtWRKY59	FtPinG0002864000.01	KMT01048
FtWRKY69	FtPinG0002142900.01	KMT19173
FtWRKY73	FtPinG0009186100.01	KMT06634
FtWRKY71	FtPinG0005364100.01	KMT04131

## Sheet: Tartary buckwheat-Soybean
Supplementary Table 3 One-to-one orthologous relationships between tartary buckwheat and glycine max.
FtWRKY Gene Name	FtWRKY Gene ID	GmWRKY Gene ID
FtWRKY12	FtPinG0003025100.01	KRH77637
FtWRKY8	FtPinG0001878200.01	KRH77041
FtWRKY8	FtPinG0001878200.01	KRH28430
FtWRKY8	FtPinG0001878200.01	KRH15403
FtWRKY2	FtPinG0000299100.01	KRH14276
FtWRKY8	FtPinG0001878200.01	KRH05637
FtWRKY9	FtPinG0005486000.01	KRH06916
FtWRKY10	FtPinG0006017000.01	KRG99982
FtWRKY7	FtPinG0004829100.01	KRH00435
FtWRKY7	FtPinG0004829100.01	KRH64216
FtWRKY12	FtPinG0003025100.01	KRH68901
FtWRKY4	FtPinG0002493300.01	KRH59007
FtWRKY12	FtPinG0003025100.01	KRH60029
FtWRKY9	FtPinG0005486000.01	KRH59804
FtWRKY8	FtPinG0001878200.01	KRH57965
FtWRKY9	FtPinG0005486000.01	KRH54160
FtWRKY10	FtPinG0006017000.01	KRH49123
FtWRKY7	FtPinG0004829100.01	KRH40720
FtWRKY9	FtPinG0005486000.01	KRH41119
FtWRKY12	FtPinG0003025100.01	KRH41300
FtWRKY4	FtPinG0002493300.01	KRH42896
FtWRKY20	FtPinG0003001300.01	KRH77041
FtWRKY17	FtPinG0006962300.01	KRH35230
FtWRKY20	FtPinG0003001300.01	KRH28430
FtWRKY16	FtPinG0005548400.01	KRH23643
FtWRKY23	FtPinG0003761600.01	KRH22585
FtWRKY20	FtPinG0003001300.01	KRH15403
FtWRKY16	FtPinG0005548400.01	KRH09652
FtWRKY20	FtPinG0003001300.01	KRH04545
FtWRKY20	FtPinG0003001300.01	KRH05637
FtWRKY19	FtPinG0004914600.01	KRH00919
FtWRKY24	FtPinG0003815100.01	KRG95903
FtWRKY24	FtPinG0003815100.01	KRH67619
FtWRKY14	FtPinG0008726200.01	KRH58435
FtWRKY23	FtPinG0003761600.01	KRH56161
FtWRKY15	FtPinG0005008400.01	KRH52231
FtWRKY16	FtPinG0005548400.01	KRH47344
FtWRKY14	FtPinG0008726200.01	KRH42308
FtWRKY16	FtPinG0005548400.01	KRH44560
FtWRKY19	FtPinG0004914600.01	KRH40304
FtWRKY30	FtPinG0006388000.01	KRH77637
FtWRKY26	FtPinG0006083600.01	KRH75009
FtWRKY31	FtPinG0000403800.01	KRH31775
FtWRKY27	FtPinG0007458900.01	KRH31775
FtWRKY32	FtPinG0001732900.01	KRH32115
FtWRKY28	FtPinG0005089800.01	KRH35230
FtWRKY29	FtPinG0005089400.01	KRH00862
FtWRKY27	FtPinG0007458900.01	KRG96545
FtWRKY31	FtPinG0000403800.01	KRG96545
FtWRKY27	FtPinG0007458900.01	KRH69197
FtWRKY31	FtPinG0000403800.01	KRH69197
FtWRKY26	FtPinG0006083600.01	KRH70870
FtWRKY32	FtPinG0001732900.01	KRH71315
FtWRKY28	FtPinG0005089800.01	KRG91594
FtWRKY31	FtPinG0000403800.01	KRH68280
FtWRKY32	FtPinG0001732900.01	KRH67313
FtWRKY27	FtPinG0007458900.01	KRH68280
FtWRKY30	FtPinG0006388000.01	KRH68901
FtWRKY30	FtPinG0006388000.01	KRH60029
FtWRKY30	FtPinG0006388000.01	KRH41300
FtWRKY38	FtPinG0007629700.01	KRH77637
FtWRKY41	FtPinG0006617300.01	KRH74950
FtWRKY38	FtPinG0007629700.01	KRH06499
FtWRKY40	FtPinG0005105500.01	KRH01137
FtWRKY41	FtPinG0006617300.01	KRH01236
FtWRKY40	FtPinG0005105500.01	KRG93506
FtWRKY41	FtPinG0006617300.01	KRG89512
FtWRKY41	FtPinG0006617300.01	KRH70820
FtWRKY38	FtPinG0007629700.01	KRH60029
FtWRKY38	FtPinG0007629700.01	KRH47935
FtWRKY41	FtPinG0006617300.01	KRH50544
FtWRKY38	FtPinG0007629700.01	KRH41300
FtWRKY40	FtPinG0005105500.01	KRH40121
FtWRKY45	FtPinG0004682800.01	KRH74950
FtWRKY49	FtPinG0006202300.01	KRH25355
FtWRKY49	FtPinG0006202300.01	KRH11472
FtWRKY49	FtPinG0006202300.01	KRH02033
FtWRKY46	FtPinG0001532600.01	KRG93506
FtWRKY42	FtPinG0000497200.01	KRG94564
FtWRKY45	FtPinG0004682800.01	KRG89512
FtWRKY45	FtPinG0004682800.01	KRH70820
FtWRKY44	FtPinG0004671500.01	KRH73864
FtWRKY48	FtPinG0007732600.01	KRH64132
FtWRKY49	FtPinG0006202300.01	KRH56161
FtWRKY48	FtPinG0007732600.01	KRH53810
FtWRKY49	FtPinG0006202300.01	KRH51128
FtWRKY45	FtPinG0004682800.01	KRH50544
FtWRKY49	FtPinG0006202300.01	KRH36485
FtWRKY52	FtPinG0002710400.01	KRH77041
FtWRKY56	FtPinG0000354800.01	KRH77637
FtWRKY54	FtPinG0006322300.01	KRH35230
FtWRKY52	FtPinG0002710400.01	KRH28430
FtWRKY55	FtPinG0008708000.01	KRH09652
FtWRKY56	FtPinG0000354800.01	KRH06499
FtWRKY52	FtPinG0002710400.01	KRH04545
FtWRKY56	FtPinG0000354800.01	KRG97154
FtWRKY54	FtPinG0006322300.01	KRG91594
FtWRKY56	FtPinG0000354800.01	KRH68901
FtWRKY51	FtPinG0002688700.01	KRH64132
FtWRKY51	FtPinG0002688700.01	KRH53810
FtWRKY51	FtPinG0002688700.01	KRH59476
FtWRKY52	FtPinG0002710400.01	KRH57965
FtWRKY56	FtPinG0000354800.01	KRH47935
FtWRKY55	FtPinG0008708000.01	KRH47344
FtWRKY51	FtPinG0002688700.01	KRH43340
FtWRKY55	FtPinG0008708000.01	KRH44560
FtWRKY62	FtPinG0004155300.01	KRH06582
FtWRKY60	FtPinG0009522600.01	KRH01236
FtWRKY62	FtPinG0004155300.01	KRH00856
FtWRKY59	FtPinG0002864000.01	KRH47344
FtWRKY62	FtPinG0004155300.01	KRH41244
FtWRKY59	FtPinG0002864000.01	KRH44560
FtWRKY62	FtPinG0004155300.01	KRH40377
FtWRKY71	FtPinG0005364100.01	KRH25355
FtWRKY69	FtPinG0002142900.01	KRH15403
FtWRKY71	FtPinG0005364100.01	KRH11472
FtWRKY69	FtPinG0002142900.01	KRH05637
FtWRKY71	FtPinG0005364100.01	KRH02033
FtWRKY70	FtPinG0009255800.01	KRH66475
FtWRKY66	FtPinG0002334500.01	KRH56941
FtWRKY71	FtPinG0005364100.01	KRH56161
FtWRKY71	FtPinG0005364100.01	KRH51128
FtWRKY70	FtPinG0009255800.01	KRH40187
FtWRKY68	FtPinG0002177700.01	KRH40304
FtWRKY71	FtPinG0005364100.01	KRH36485

## Sheet: Tartary buckwheat-Sunflower
Supplementary Table 3 One-to-one orthologous relationships between tartary buckwheat and helianthus annuus.
FtWRKY Gene Name	FtWRKY Gene ID	HaWRKY Gene ID
FtWRKY11	FtPinG0001921200.01	OTG09881
FtWRKY11	FtPinG0001921200.01	OTF94067
FtWRKY4	FtPinG0002493300.01	OTF92191
FtWRKY8	FtPinG0001878200.01	OTG27755
FtWRKY8	FtPinG0001878200.01	OTG16048
FtWRKY20	FtPinG0003001300.01	OTF91280
FtWRKY23	FtPinG0003761600.01	OTG29889
FtWRKY24	FtPinG0003815100.01	OTG20676
FtWRKY16	FtPinG0005548400.01	OTG16715
FtWRKY20	FtPinG0003001300.01	OTG16048
FtWRKY32	FtPinG0001732900.01	OTG09881
FtWRKY32	FtPinG0001732900.01	OTF94067
FtWRKY30	FtPinG0006388000.01	OTG32308
FtWRKY27	FtPinG0007458900.01	OTG27995
FtWRKY28	FtPinG0005089800.01	OTG21941
FtWRKY29	FtPinG0005089400.01	OTG21945
FtWRKY31	FtPinG0000403800.01	OTG22128
FtWRKY37	FtPinG0008419400.01	OTG21945
FtWRKY42	FtPinG0000497200.01	OTG04355
FtWRKY49	FtPinG0006202300.01	OTG23771
FtWRKY45	FtPinG0004682800.01	OTG17360
FtWRKY52	FtPinG0002710400.01	OTF91280
FtWRKY62	FtPinG0004155300.01	OTF87471
FtWRKY62	FtPinG0004155300.01	OTG29307
FtWRKY61	FtPinG0004132200.01	OTG23771
FtWRKY62	FtPinG0004155300.01	OTG22333
FtWRKY71	FtPinG0005364100.01	OTG23771

## Sheet: Tarary buckwheat-Rice
Supplementary Table 3 One-to-one orthologous relationships between tartary buckwheat and oryza sativa.
FtWRKY Gene Name	FtWRKY Gene ID	OsWRKY Gene ID
FtWRKY7	FtPinG0004829100.01	Os01t0820400-01
FtWRKY7	FtPinG0004829100.01	Os11t0116900-01
FtWRKY7	FtPinG0004829100.01	Os12t0116400-00
FtWRKY7	FtPinG0004829100.01	Os05t0478400-00
FtWRKY7	FtPinG0004829100.01	Os07t0680400-01
FtWRKY32	FtPinG0001732900.01	Os03t0798500-01
FtWRKY26	FtPinG0006083600.01	Os03t0758000-01
FtWRKY32	FtPinG0001732900.01	Os03t0741400-01
FtWRKY41	FtPinG0006617300.01	Os03t0758950-01
FtWRKY41	FtPinG0006617300.01	Os07t0596900-00
FtWRKY45	FtPinG0004682800.01	Os07t0596900-00
FtWRKY70	FtPinG0009255800.01	Os02t0652100-01
FtWRKY70	FtPinG0009255800.01	Os04t0545000-01

## Sheet: Tarary bucwheat-tomato
Supplementary Table 3 One-to-one orthologous relationships between tartary buckwheat and solanum lycopersicum.
FtWRKY Gene Name	FtWRKY Gene ID	SlWRKY Gene ID
FtWRKY12	FtPinG0003025100.01	Solyc01g095630.2.1
FtWRKY5	FtPinG0003193100.01	Solyc02g093050.2.1
FtWRKY9	FtPinG0005486000.01	Solyc02g094270.1.1
FtWRKY4	FtPinG0002493300.01	Solyc02g072190.2.1
FtWRKY8	FtPinG0001878200.01	Solyc02g093050.2.1
FtWRKY5	FtPinG0003193100.01	Solyc04g078550.2.1
FtWRKY8	FtPinG0001878200.01	Solyc04g078550.2.1
FtWRKY12	FtPinG0003025100.01	Solyc08g008280.2.1
FtWRKY12	FtPinG0003025100.01	Solyc08g082110.2.1
FtWRKY10	FtPinG0006017000.01	Solyc09g010960.2.1
FtWRKY24	FtPinG0003815100.01	Solyc10g084380.1.1
FtWRKY14	FtPinG0008726200.01	Solyc02g071130.2.1
FtWRKY20	FtPinG0003001300.01	Solyc02g093050.2.1
FtWRKY16	FtPinG0005548400.01	Solyc03g116890.2.1
FtWRKY17	FtPinG0006962300.01	Solyc03g007640.1.1
FtWRKY20	FtPinG0003001300.01	Solyc04g078550.2.1
FtWRKY16	FtPinG0005548400.01	Solyc06g068460.2.1
FtWRKY22	FtPinG0003722700.01	Solyc08g006320.2.1
FtWRKY31	FtPinG0000403800.01	Solyc01g079260.2.1
FtWRKY28	FtPinG0005089800.01	Solyc01g095100.2.1
FtWRKY27	FtPinG0007458900.01	Solyc01g079260.2.1
FtWRKY30	FtPinG0006388000.01	Solyc01g095630.2.1
FtWRKY30	FtPinG0006388000.01	Solyc10g009550.2.1
FtWRKY28	FtPinG0005089800.01	Solyc10g011910.2.1
FtWRKY26	FtPinG0006083600.01	Solyc05g012500.2.1
FtWRKY34	FtPinG0004460400.01	Solyc06g070990.2.1
FtWRKY28	FtPinG0005089800.01	Solyc08g081610.2.1
FtWRKY29	FtPinG0005089400.01	Solyc08g081630.1.1
FtWRKY30	FtPinG0006388000.01	Solyc08g082110.2.1
FtWRKY30	FtPinG0006388000.01	Solyc08g008280.2.1
FtWRKY32	FtPinG0001732900.01	Solyc09g066010.2.1
FtWRKY38	FtPinG0007629700.01	Solyc01g095630.2.1
FtWRKY41	FtPinG0006617300.01	Solyc02g088340.2.1
FtWRKY39	FtPinG0005111700.01	Solyc02g088340.2.1
FtWRKY40	FtPinG0005105500.01	Solyc02g067430.2.1
FtWRKY41	FtPinG0006617300.01	Solyc05g012770.2.1
FtWRKY37	FtPinG0008419400.01	Solyc08g081630.1.1
FtWRKY38	FtPinG0007629700.01	Solyc08g082110.2.1
FtWRKY38	FtPinG0007629700.01	Solyc08g008280.2.1
FtWRKY45	FtPinG0004682800.01	Solyc02g088340.2.1
FtWRKY49	FtPinG0006202300.01	Solyc02g080890.2.1
FtWRKY46	FtPinG0001532600.01	Solyc02g067430.2.1
FtWRKY49	FtPinG0006202300.01	Solyc02g032950.2.1
FtWRKY45	FtPinG0004682800.01	Solyc05g012770.2.1
FtWRKY42	FtPinG0000497200.01	Solyc05g015850.2.1
FtWRKY56	FtPinG0000354800.01	Solyc01g095630.2.1
FtWRKY56	FtPinG0000354800.01	Solyc10g009550.2.1
FtWRKY52	FtPinG0002710400.01	Solyc02g093050.2.1
FtWRKY52	FtPinG0002710400.01	Solyc04g078550.2.1
FtWRKY51	FtPinG0002688700.01	Solyc04g051540.2.1
FtWRKY62	FtPinG0004155300.01	Solyc01g095100.2.1
FtWRKY62	FtPinG0004155300.01	Solyc10g011910.2.1
FtWRKY62	FtPinG0004155300.01	Solyc05g050060.1.1
FtWRKY62	FtPinG0004155300.01	Solyc08g081610.2.1
FtWRKY70	FtPinG0009255800.01	Solyc01g089960.2.1
FtWRKY71	FtPinG0005364100.01	Solyc02g080890.2.1
FtWRKY71	FtPinG0005364100.01	Solyc02g032950.2.1
FtWRKY67	FtPinG0002325700.01	Solyc02g071130.2.1
FtWRKY29	FtPinG0002142900.01	Solyc04g078550.2.1
FtWRKY66	FtPinG0002334500.01	Solyc06g070990.2.1

## Sheet: Tarary buckwheat-Grape
Supplementary Table 3 One-to-one orthologous relationships between tartary buckwheat and vitis vinifera.
FtWRKY Gene Name	FtWRKY Gene ID	VvWRKY Gene ID
FtWRKY9	FtPinG0005486000.01	VIT_01s0010g03930.t01
FtWRKY4	FtPinG0002493300.01	VIT_10s0003g01600.t01
FtWRKY7	FtPinG0004829100.01	VIT_13s0067g03140.t01
FtWRKY9	FtPinG0005486000.01	VIT_14s0068g01770.t01
FtWRKY5	FtPinG0003193100.01	VIT_18s0001g10030.t01
FtWRKY8	FtPinG0001878200.01	VIT_18s0001g10030.t01
FtWRKY2	FtPinG0000299100.01	VIT_19s0090g01720.t01
FtWRKY12	FtPinG0003025100.01	VIT_02s0025g01280.t01
FtWRKY5	FtPinG0003193100.01	VIT_07s0031g00080.t01
FtWRKY8	FtPinG0001878200.01	VIT_07s0031g00080.t01
FtWRKY7	FtPinG0004829100.01	VIT_08s0058g01390.t0
FtWRKY10	FtPinG0006017000.01	VIT_08s0007g00570.t01
FtWRKY14	FtPinG0008726200.01	VIT_10s0003g02810.t01
FtWRKY23	FtPinG0003761600.01	VIT_12s0059g00880.t01
FtWRKY18	FtPinG0007313500.01	VIT_14s0081g00560.t01
FtWRKY20	FtPinG0003001300.01	VIT_18s0001g10030.t01
FtWRKY19	FtPinG0004914600.01	VIT_04s0023g00470.t01
FtWRKY15	FtPinG0005008400.01	VIT_04s0008g01470.t01
FtWRKY18	FtPinG0007313500.01	VIT_07s0141g00680.t01
FtWRKY20	FtPinG0003001300.01	VIT_07s0031g00080.t01
FtWRKY24	FtPinG0003815100.01	VIT_08s0040g03070.t01
FtWRKY26	FtPinG0006083600.01	VIT_01s0011g00720.t01
FtWRKY30	FtPinG0006388000.01	VIT_15s0046g01140.t01
FtWRKY28	FtPinG0005089800.01	VIT_16s0050g01480.t01
FtWRKY28	FtPinG0005089800.01	VIT_02s0025g00420.t01
FtWRKY30	FtPinG0006388000.01	VIT_02s0025g01280.t01
FtWRKY31	FtPinG0000403800.01	VIT_07s0005g01710.t01
FtWRKY27	FtPinG0007458900.01	VIT_07s0005g01710.t01
FtWRKY32	FtPinG0001732900.01	VIT_07s0141g00680.t01
FtWRKY41	FtPinG0006617300.01	VIT_14s0108g01280.t01
FtWRKY40	FtPinG0005105500.01	VIT_14s0108g00120.t01
FtWRKY39	FtPinG0005111700.01	VIT_14s0108g01280.t01
FtWRKY38	FtPinG0007629700.01	VIT_02s0025g01280.t01
FtWRKY42	FtPinG0000497200.01	VIT_01s0010g03930.t01
FtWRKY49	FtPinG0006202300.01	VIT_10s0116g01200.t01
FtWRKY49	FtPinG0006202300.01	VIT_12s0059g00880.t01
FtWRKY45	FtPinG0004682800.01	VIT_14s0108g01280.t01
FtWRKY46	FtPinG0001532600.01	VIT_14s0108g00120.t01
FtWRKY42	FtPinG0000497200.01	VIT_14s0068g01770.t01
FtWRKY49	FtPinG0006202300.01	VIT_19s0090g00840.t01
FtWRKY44	FtPinG0004671500.01	VIT_19s0090g01720.t01
FtWRKY47	FtPinG0004237400.01	VIT_04s0008g05750.t01
FtWRKY56	FtPinG0000354800.01	VIT_15s0046g01140.t01
FtWRKY54	FtPinG0006322300.01	VIT_16s0050g01480.t01
FtWRKY52	FtPinG0002710400.01	VIT_18s0001g10030.t01
FtWRKY51	FtPinG0002688700.01	VIT_07s0031g01840.t01
FtWRKY52	FtPinG0002710400.01	VIT_07s0031g00080.t01
FtWRKY55	FtPinG0008708000.01	VIT_09s0018g00240.t01
FtWRKY61	FtPinG0004132200.01	VIT_10s0116g01200.t01
FtWRKY64	FtPinG0007552800.01	VIT_12s0057g00550.t01
FtWRKY62	FtPinG0004155300.01	VIT_15s0046g02190.t01
FtWRKY61	FtPinG0004132200.01	VIT_19s0090g00840.t01
FtWRKY62	FtPinG0004155300.01	VIT_02s0025g00420.t01
FtWRKY57	FtPinG0003093800.01	VIT_04s0023g00470.t01
FtWRKY71	FtPinG0005364100.01	VIT_10s0116g01200.t01
FtWRKY67	FtPinG0002325700.01	VIT_10s0003g02810.t01
FtWRKY71	FtPinG0005364100.01	VIT_12s0059g00880.t01
FtWRKY70	FtPinG0009255800.01	VIT_15s0021g01310.t01
FtWRKY71	FtPinG0005364100.01	VIT_19s0090g00840.t01
FtWRKY68	FtPinG0002177700.01	VIT_04s0023g00470.t01

## Sheet: Duplicated FtWRKY
Duplicated FtWRKY gene pairs
FtWRKY14	FtWRKY76
FtWRKY14	FtWRKY67
FtWRKY1	FtWRKY25
FtWRKY17	FtWRKY54
FtWRKY5	FtWRKY8
FtWRKY5	FtWRKY69
FtWRKY5	FtWRKY20
FtWRKY27	FtWRKY31
FtWRKY8	FtWRKY20
FtWRKY48	FtWRKY51
FtWRKY29	FtWRKY37
FtWRKY30	FtWRKY38
FtWRKY39	FtWRKY60
FtWRKY40	FtWRKY46
FtWRKY11	FtWRKY32
FtWRKY49	FtWRKY61
FtWRKY49	FtWRKY71
FtWRKY20	FtWRKY69
FtWRKY20	FtWRKY52
FtWRKY12	FtWRKY30
FtWRKY12	FtWRKY38
FtWRKY41	FtWRKY45
FtWRKY13	FtWRKY18
