# Supplementary material for: Genome-wide investigation of WRKY transcription factors in Tartary buckwheat (Fagopyrum tataricum) and their potential roles in regulating growth and development
Source: PeerJ. 2020 Mar 5;8:e8727. doi: 10.7717/peerj.8727 (PMC7060923; doi:10.7717/peerj.8727)
Supplement: Table S4 [file peerj-08-8727-s004.xls]

## Sheet: Sheet1
Supplementary Table 4 Primers of sequences
Gene ID	Forward primer (5`- 3`)	Reverse primer (5`- 3`)	Specific regions
FtWRKY7	TGAGGATCCAGGTTGCGATG	TTCTCCAAGCGTGACCATCC	TAGGAGCTGTGACGCGTCGCTTGTTTCTCGATCTTCTGATGACTGTAAAATTGAGGATCCAGGTTGCGATGGTGGTGGTGAGAGCTCGCGGATCAAGGACCGGAGAGGCTGTTACAAACGGAGAAAGAGAGGGCAGGCCTGGACAACCGAGGGCGAGGGTCCTTCTGAGGATGGTCACGCTTGGAGAAAG
FtWRKY9	ACCGAAACCGAAACCGAAGA	ACGTCGCATCCTGAATGTGT	GGTAAGAAACCGAAACCGAAACCGAAGAGGCACAAGTATGCGTTTCATACAAGAAGTCGTGTCGATATTCTTGATGATGGGTATCGCTGGAGAAAGTACGGTCAGAAAGCTGTTAAAAACAACGTCTTTCCAAGAAGCTACTACAGATGCACACATTCAGGATGCGACGT
FtWRKY13	CGAGGATCTGCATGTTGGGT	TCCACGTAGAGTCGGCTTTC	ATGCCGAGCTCTTCAGTTTCCACTATGGGAAGTCCTAAGAGCGAGGATCTGCATGTTGGGTTCAACAACTCTTATCAAGATGACAAACAAAAGTCGAAAAAGAGGAAAGCCGACTCTACGTGGACAGAAAAATTGACAGTGAATTCGGGAACTAGATCTGATGCTCCCCCAGCT
FtWRKY15	TTTCCACCATGGTTTCTGGGT	CAATCCGCACTTTCGCTTCC	TGATGATCTTTCCACCATGGTTTCTGGGTATTTACAGAATGGTGGATTTGCGACAAATGAACCGGTTCACATTACTAGTAGTGGTCATAATCAAGGAGAGAGTAGTAGAAGAGCTAACAGGGGCAATGAAAGGGAAGCGAAAGTGCGGATTGCATTCAAAA
FtWRKY18	TACCCGCTTGTCGATTAGGC	TGGACCTTCACCCCAAGAAC	TACTTATTACCCCCAAAACCAGTTCATCGATACCCGCTTGTCGATTAGGCCTCCTTGCGATAGAACTGCAGAGCCAAATGAGTTGCAGAGGATGCATTTTCATCATCAACAGGAAAAAATGAAGTATGATGCTGATATGTGTTCTTGGGGTGAAGGTCCAAGTACTGTGTCGTCGATTGTGT
FtWRKY20	CGTCGATCGCAAGGAAGCTA	CCAGCGGATGAGATGTTGGA	CCATTGCCTGTTAACGTAAATAAAATCGTCGATCGCAAGGAAGCTACAACCACAATCAATTTTACATCATCACCTGCTAATTCGTTCATGTCCTCAGTCACCGGAGACACAGATAGCGTAACTCCATCGATGTCGTCTGGTTTTCAGATTACGAATCTCTCCAACATCTCATCCGCTGGA
FtWRKY23	TGGGTGGAATCCGCATAAGG	CTTCCTCCATTGGCATCCGT	GATCACCTGAAGAACAAGCGGGTCATGGGTGGAATCCGCATAAGGTTGCAAGGTTGAGTCCTCCTAAGAGTAGTGCTGATCAAAGTGCCGCTGAAGCTACCATGAGGAAGGCTCGTGTGTCGGTTCGAGCTCGCTCCGAAGCACCCATGATAACGGACGGATGCCAATGGAGGAAGTATGGCCAAAAG
FtWRKY28	GAGCAAAGCAAAGACGACCC	TCCGAAATCGTCCACGTCAT	AGAAGCACGTAGAGCAAAGCAAAGACGACCCACAAACCTTCATCGTTACCTACATCGCCGATCACACTCACTCTCCTCCGACCAGACGTCACGCTCAAGCCGGCCGGAAAATCACCAAGTTCTCTTCCTCAACCACCAGGATGAAGATTAATAATAATACAAATAAAAATACTCCGCCGTGCTCGGATAGTATGACGTGGACGATTTCGGACCCTTCGAT
FtWRKY29	GGGATCGTCATCCACTTCGT	TACGCCTTCTTCCCACACCA	GATCATCAGCAAGTTTACCCACAACTTCAGCAAGTTCCTTTAGATATTGATTGGGTTAGTCTTCTTTCCGGCAACCCGCCCCCCACCGCGGGATCGTCATCCACTTCGTTTCCGAACGGTGGCTGTGGTGGCGGCGATTGCGTAAATGATGGTGGTCGTAAAGGGAGAGATGGTGTGGGAAGAAGGCGTAATGTTACTG
FtWRKY33	AGGCGTCCAAGCAATACCTG	AGGTCTCGTGGTCCTCTTGA	TCACAATTCTCTACAAATGCACATACTTACATTCTTGCAACAACAACAAAACCAAAATCAAAACTTGCAAGCAACCTCTCAAGAACTAGGCGTCCAAGCAATACCTGAAACGGGCGATCATAATCAAGGAGGGTCTCGGCAATGCTCGGGCATGGTCCCTTTCGGAACGGCTCATAATCAAGAGGACCACGAGACCTCGT
FtWRKY34	GAGCTCTCGCTAAGTCTCGG	GTTCCGGTTGGTTCCACTGA	ATACGCATGAGCTCTCGCTAAGTCTCGGGAGAAACTCAAGCATCGATTCAAAGAACAAAGATGAGACCAACAAGAACAACTTTCCTGAGTTAAGCCCACAAGAAACCCTAGTTAAACAGAATAGTGGATTGTCTCTTGCCTTAGATTACAAAAATCAAGGTGGGTCCAAAACCTCAGTGGAACCAACCGGAACGAAGCAA
FtWRKY35	ACTGAGACGACTTCGCCTTG	CATCCAAATCAACCGGCACC	TGAGTCTCCTATGTCTAGTCAGACTGAGACGACTTCGCCTTGTTCGTCTTCCTTCGTCGTGTTTGATCATGATGATGATCTGGAGAGGCTAAATGAGGAGATGAAGGTGCCGGTTGATTTGGATGGGGAAAATCAAATCCAAGCAAAATTATCTTCTAAA
FtWRKY37	TTACTCCGAGGGTTGCGTTT	CACGTTGCATGTGTGGTACG	TCTAGGGTTACTCCGAGGGTTGCGTTTCATACGACAAGTGTTGAAGATGTTCTTGATGATGGGTATAAGTGGAGGAAATATGGACAGAAGTCAGTCAAAAATAGCCTTCATCCCAGGAGCTATTACCGGTGCACGTACCACACATGCAACGTGAAGAAGC
FtWRKY39	CCATGATCCACCACAGCCTT	TTTTGCATTCGGCTCCTCCT	ATAACCATGATCCACCACAGCCTTCAAGAAGAGGTAGAGATAACAGCAATATTGATAATGACTCCAAATGGTCCAATGGAGCCGAGGACTCGGCTCAAGCTACGTCTATTCAGTTACATGGGCCGAGTGATAGTGAGGAGTCTGGTGATGGGTATCAAGGATTTGACGAGAATGATGATGAGGAGGAGCCGAATGCAAAAAGAAG
FtWRKY40	CGAAGGAACCCACAACCACT	TGGTGGTGGGAGGAGCTATT	AGAGGACATGTCAATCCTAATAACGACATACGAAGGAACCCACAACCACTCGCTTCCGGTTGCAGCCACAGCCATGGCTTCAACAACCTCAGCTGCTGCATCCATCCTATTGGCTAAATCATCAACCTCGCAAGATGTTTCATCATCAATAGCTCCTCCCACCACCACAACAAACATCAATGGCCTAAATTTCACACTAT
FtWRKY42	AGAAGGCGAAGAAACATCGGT	TTGACGGCCTTTTGACCGTA	ATTGGGGATATCGAACAAGGGAGATCATAAGAAGGCGAAGAAACATCGGTATGCTTTTCAGACAAGAAGCCAAGTTGATATTCTTGATGATGGATATCGATGGAGGAAGTACGGTCAAAAGGCCGTCAAGAATAACAACTTCCCACGAAGCTACTATCGGTGCACGCACC
FtWRKY43	CCATCGTCACTCACAAGGCT	GCTCGTGTGTACTGGTGGAA	TACTCGGAGCTAAGTTCAGAAGGGGCTATTACCGATGCACCCATCGTCACTCACAAGGCTGTGCAGCACTGAAGCAAGTCCAAAGATCCGATGAGGACCCCACAGTCTCACAGGTCATCTACGTAGGGGACCACACGTGTAACACAACCATCCAGATCACCGGTCCTTCCACCAGTACACACGAGCCACG
FtWRKY47	TCGCCCATTGATCTTAGCCC	CAGTGTTGTACGGGGCTTCT	TGTCGCCCATTGATCTTAGCCCTTCGAGTATTAATAGCACGGCTTCTGATCATCTGATCCGAAATCTTCTCGTCTCTGACCATACAAACGAAAATTCCGAAGAAGAAAATGTTGATGATCAAGATAGAAGCCCCGTACAACACTGGCTCGTAGAACAAATGGCTTCGTCTTTGATAAAAGATCCTAAATT
FtWRKY53	ATTTGCCACCGGCTCCTATG	GCTCCTACGATTGGGGTTGT	CTATTTGCCACCGGCTCCTATGCATCTGTAGAACCTGGAAATATTTGCAGGGGGGTGGGAAAGGAGAGGGAGATGAACAAAGGAGAGAGTAAATATACATTGAAGATGAAATGCAACGGTAATGGGGTTGCTGACGATGGGTATAGATGGAGGAAATATGGTCAAAAAATCATCAAGAACAACCCCAATCGTAGGAGCTA
FtWRKY55	TGCACCAAGTTGTCCTGTGA	ATTGTTTGACACCACACGCC	TGCTCATTTGCACCAAGTTGTCCTGTGAAAAAGAAGGTTCAAAGAAGTCTAGAAGACCAATCAATACTAGTAGCAACCTATGAAGGAGAACACAACCATCCACCACTATCTCAACCACAAGACATGTCAGCAGCATCAACTCCGGCCACCGGAGCTAACCGGCGTGTGGTGTCAAACAATACACTAAACT
FtWRKY60	CATCGAGATTGTCACCCCGT	TTTGCACTAGCCGAGATGGT	GTGTACTCATCGAGATTGTCACCCCGTAAGAAAGAGAGTGCAGCACGCAGTGGCTGGACACATAACCGAGGTCATCTATACGGGTCATCACAATCATCCACCATCTCGGCTAGTGCAAAGAGACACATCTACTCAAAAGCGTGAGATAATTGATTCGGTTGACACTTATACGACATTTGA
FtWRKY61	CCTAGGCTTAACGGTGGTCC	AATAAGCTCGAGGGCATGGG	TTCCTAGGCTTAACGGTGGTCCGGAGGAAGGTGAATCGCAACATGAAATGACGATGAGGAGGGCACGTGTGTCAGTTCGAGCTCGGTCCGAAGCATCTATGATAAGTGACGGATGTCAATGGAGGAAGTATGGACAGAAAATGGCTAAGGGAAACCCATGCCCTCGAGCTTATTATCGTTGCACCATGGGCACTTCTTGT
FtWRKY66	TGCCCTCGAGCGTATTATCG	ATGTATGCTGCTGCCGATGT	GAAAGGAAATCCATGCCCTCGAGCGTATTATCGGTGCACCGTCGCCCCATCTTGCCCAGTCAGAAAACAGGTGCAGAGATGTGTAGATGACATGTCTATCCTAATTAGTACATACGAAGGGACACACAACCACCCATTACCAATCTCTGCAACCGCCATGGCTACAACCACATCGGCAGCAGCATACATGCTAATGTCCG
FtWRKY72	AACGACACCCAGTGATGACG	TAATGACGGCTCCACCCAAC	ATCTCTCCAGCGACTCCAACACCACCCGAAACGACACCCAGTGATGACGTCGATACAGACGCCACTACTTGTACGGAAGAGTTTCCTTCTGAAGAGCGCAAGGAGTTGTTAGCCTGTGCAGCTGAGCTAGGGTTGGGTGGAGCCGTCATTATGGACTTTAGCTGG
FtWRKY74	GGCCAAAAGGTGACGAGAGA	CCACGCTCCTTTGCACTTTC	CCGCGTAGACGAGTCTGATACAAGCCTTGCTGTCAAGGATGGATATCAATGGAGGAAATACGGCCAAAAGGTGACGAGAGATAACCCATCTCCGAGGGCTTATTTCAAATGCTCATTTGCTCCACTTTGTCCTGTTAAAAAGAAAGTGCAAAGGAGCGTGGATGACTCAACGGTTTTGGT
FtWRKY76	TAGATGCACGACGCAGAAGT	TTGGGGATGTGGAACCCTTG	AGCTACTATAGATGCACGACGCAGAAGTGCACGGTGAAGAAGAGAGTGGAGAGATCATTCGAGGATCCATCGATTGTGATCACGACATACGAAGGACAACACAACCACCATGTTCCGGCAACACTAAGAGGTCATGCGTCCGGAATCCTCTCACATCCATTAAGTTTAATGACGTCACAAGGGTTCCACATCCCCAATCA
FtH3	GAAATTCGCAAGTACCAGAAGAG	CCAACAAGGTATGCCTCAGC
